# Supplementary material for: Copper-catalyzed deacetonative Sonogashira coupling
Source: Royal Society of Chemistry journal article supplement (doi:10.1039/d2ob01267g), 2022-01-01
Supplement: d2ob01267g1.pdf [file d2ob01267g1.pdf]

Supporting Information

**Copper-Catalyzed Deacetonative Sonogashira Coupling**

Yury N. Kotovshchikov,\* Artem A. Binyakovsky, Gennadij V. Latyshev,  
Nikolay V. Lukashev, and Irina P. Beletskaya

Chemistry Department, M. V. Lomonosov Moscow State University,  
Leninskiye Gory 1/3, Moscow 119991, Russia

E-mail: [kotovshchikov@org.chem.msu.ru](mailto:kotovshchikov@org.chem.msu.ru)

**Table of Contents**

|                                                                      |     |
|----------------------------------------------------------------------|-----|
| General information.....                                             | S2  |
| Experimental procedures and characterization data for compounds..... | S2  |
| Copies of NMR spectra .....                                          | S12 |
| References .....                                                     | S55 |

## General information

NMR spectra were recorded with Bruker Avance 400, Agilent 400MR ( $^1\text{H}$  400 MHz,  $^{13}\text{C}$  100 MHz), and Bruker Avance 600 ( $^1\text{H}$  600 MHz,  $^{13}\text{C}$  151 MHz) spectrometers at ambient temperature. Chemical shifts are presented in ppm ( $\delta$  scale) and referenced to tetramethylsilane ( $\delta = 0$  ppm) in the  $^1\text{H}$  NMR spectra and to the solvent signal in the  $^{13}\text{C}$  NMR spectra. MALDI-TOF spectra were recorded with a Bruker Daltonics UltraFlex instrument in a dithranol or a cinnamic acid matrix using PEG 300, PEG 400 or PEG 600 as the internal standard. ESI mass spectra were obtained from Thermo Scientific LTQ Orbitrap and Sciex TripleTOF 5600+ spectrometers. Column chromatography was carried out on Macherey–Nagel silica gel 60 (0.040–0.063 mm).

## Experimental procedures and characterization data for compounds

### Starting compounds

List of organic halides **2a–v** and **4a–d** used as coupling partners:

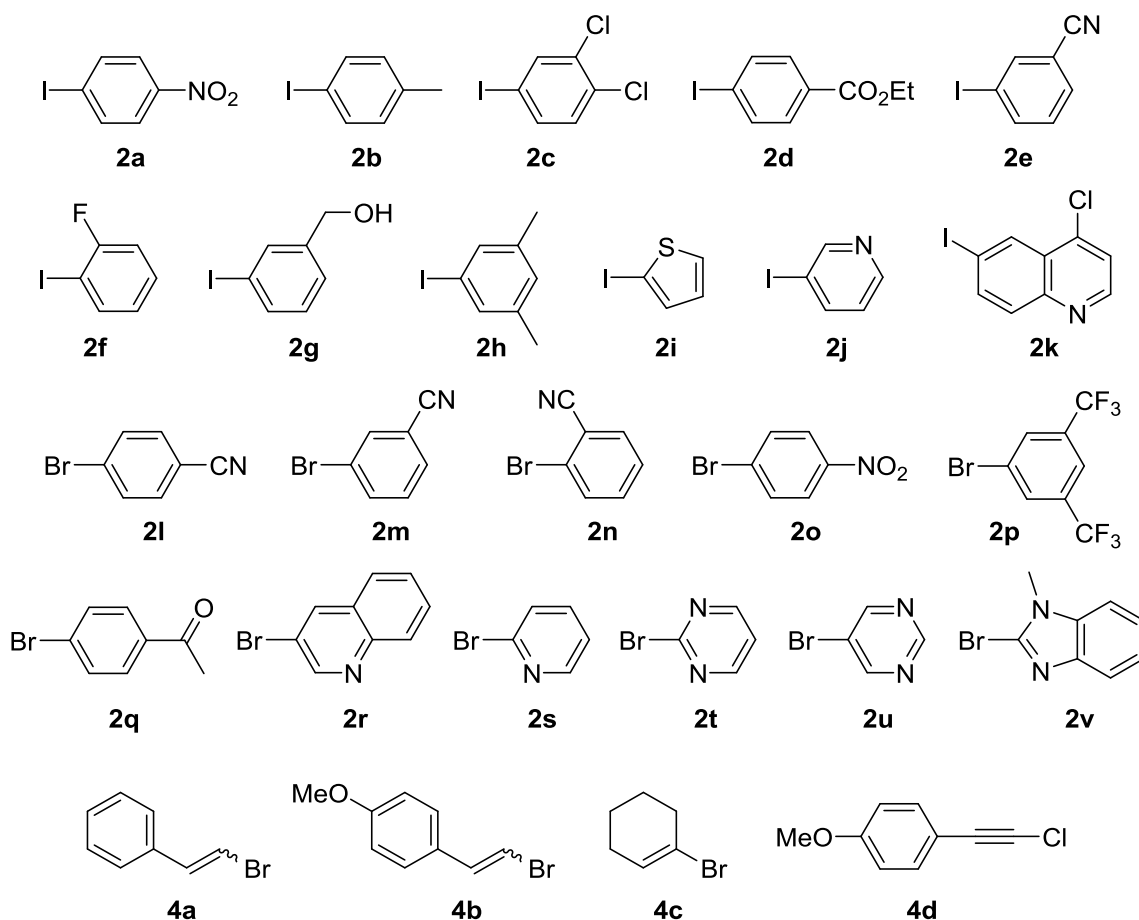

Vinyl iodides **4e** and **4f** were prepared according to reported procedures through iodination of hydrazones obtained from the corresponding ketosteroids.<sup>1</sup>

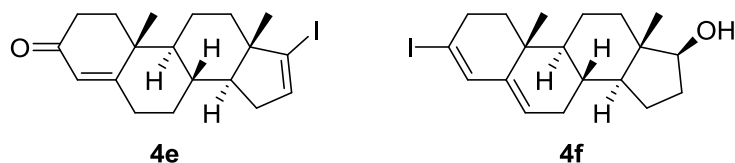

Propargyl alcohols **1a-d,f,g** were prepared from 2-methylbut-3-yn-2-ol and the corresponding (het)aryl iodides (for **1a-c,g**) or bromides (for **1d,f**) using standard protocol for Pd/Cu-cocatalyzed Sonogashira cross-coupling. Compound **1e** was obtained by oxidative alkylation of ferrocene according to the literature.<sup>2</sup>

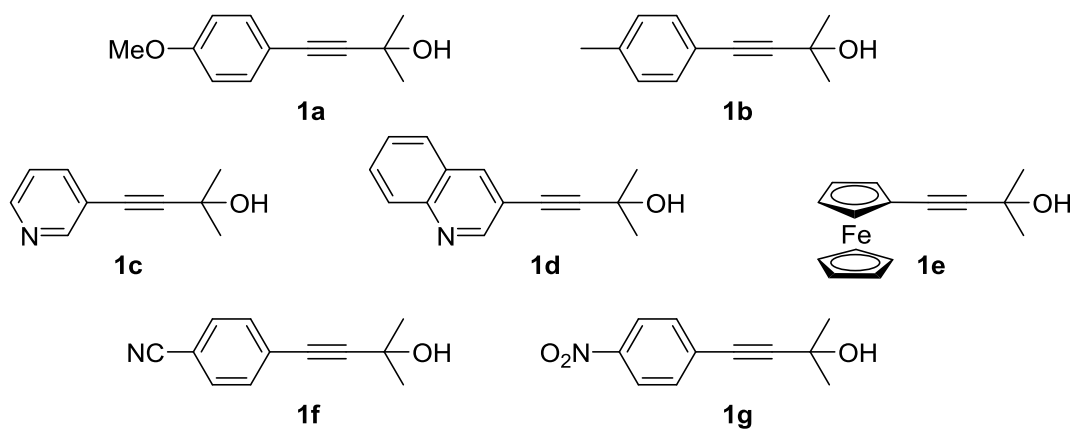

### Cu-catalyzed deacetonative Sonogashira coupling

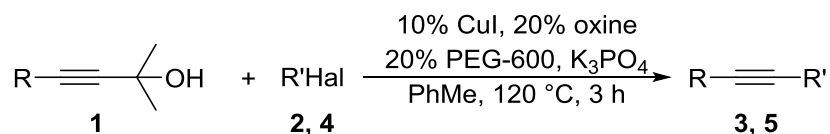

**General procedure.** In a vial with a screw cap propargyl alcohol **1** (0.24 mmol, 1.2 equiv), organic halide **2** or **4** (0.20 mmol, 1.0 equiv), CuI (3.8 mg, 0.020 mmol, 10 mol%), oxine (5.8 mg, 0.040 mmol, 20 mol%), PEG-600 (21.6  $\mu\text{L}$ , 0.040 mmol, 20 mol%), and  $\text{K}_3\text{PO}_4$  (170 mg, 0.80 mmol, 4.0 equiv) were mixed under an Ar atmosphere in toluene (1 mL). The reaction mixture was stirred at 120  $^\circ\text{C}$  for 3 h, then diluted with  $\text{CH}_2\text{Cl}_2$  (20 mL) and washed with water (20 mL). The organic layer was dried with anhydrous  $\text{Na}_2\text{SO}_4$ , and the solvents were evaporated *in vacuo*. The residue was purified by column chromatography.

### 1-Methoxy-4-[(4-nitrophenyl)ethynyl]benzene (**3a**):

Prepared from 4-(4-methoxyphenyl)-2-methylbut-3-yn-2-ol **1a** (45.6 mg, 0.24 mmol) and 1-iodo-4-nitrobenzene **2a** (49.8 mg, 0.20 mmol) according to the general procedure; eluent: hexanes-PhH = 2:1. Yield 43 mg (85%). Prepared from 4-(4-methoxyphenyl)-2-methylbut-3-yn-2-ol **1a** (45.6 mg, 0.24 mmol)

and 1-bromo-4-nitrobenzene **2o** (40.4 mg, 0.20 mmol) according to the general procedure; eluent: hexanes–PhH = 2:1. Yield 14.4 mg (28%). Yellow solid; mp 119–121 °C (lit.<sup>3</sup> 119.5–120.8 °C); <sup>1</sup>H NMR (400 MHz, CDCl<sub>3</sub>) δ 8.19 (m, 2H), 7.62 (m, 2H), 7.49 (m, 2H), 6.90 (m, 2H), 3.84 (s, 3H).

### 1-Methoxy-4-[(4-methylphenyl)ethynyl]benzene (**3b**):

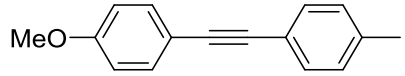 Prepared from 4-(4-methoxyphenyl)-2-methylbut-3-yn-2-ol **1a** (45.6 mg, 0.24 mmol) and 4-iodotoluene **2b** (43.6 mg, 0.20 mmol) according to the general procedure; eluent: hexanes–PhH = 3:1. Yield 39 mg (88%). White solid; mp 126–128 °C (lit.<sup>4</sup> 125.7–128.1 °C); <sup>1</sup>H NMR (600 MHz, CDCl<sub>3</sub>) δ 7.45 (m, 2H), 7.40 (m, 2H), 7.13 (m, 2H), 6.86 (m, 2H), 3.81 (s, 3H), 2.35 (s, 3H).

### 1,2-Dichloro-4-[(4-methoxyphenyl)ethynyl]benzene (**3c**):

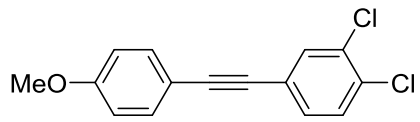 Prepared from 4-(4-methoxyphenyl)-2-methylbut-3-yn-2-ol **1a** (45.6 mg, 0.24 mmol) and 1,2-dichloro-4-iodobenzene **2c** (54.6 mg, 0.20 mmol) according to the general procedure; eluent: hexanes–CH<sub>2</sub>Cl<sub>2</sub> = 4:1. Yield 31 mg (56%). White solid; mp 68–70 °C; <sup>1</sup>H NMR (400 MHz, CDCl<sub>3</sub>) δ 7.58 (d, *J* = 1.8 Hz, 1H, 3-CH<sub>Ar</sub>), 7.45 (m, 2H), 7.39 (d, *J* = 8.3 Hz, 1H, 6-CH<sub>Ar</sub>), 7.31 (dd, *J* = 8.3, 1.8 Hz, 1H, 5-CH<sub>Ar</sub>), 6.88 (m, 2H), 3.83 (s, 3H); <sup>13</sup>C NMR (100 MHz, CDCl<sub>3</sub>) δ 160.0 (C<sub>quat</sub>), 133.1 (2C), 132.9, 132.4 (C<sub>quat</sub>), 132.1 (C<sub>quat</sub>), 130.5, 130.3, 123.6 (C<sub>quat</sub>), 114.5 (C<sub>quat</sub>), 114.1 (2C), 91.4 (C≡C), 85.8 (C≡C), 55.3 (CH<sub>3</sub>); HRMS (ESI-TOF) calcd for C<sub>15</sub>H<sub>11</sub>Cl<sub>2</sub>O [M+H]<sup>+</sup> 277.0181; found 277.0180.

### Ethyl 4-[(4-methoxyphenyl)ethynyl]benzoate (**3d**):

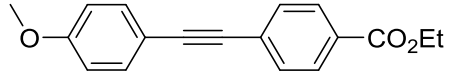 Prepared from 4-(4-methoxyphenyl)-2-methylbut-3-yn-2-ol **1a** (45.6 mg, 0.24 mmol) and ethyl 4-iodobenzoate **2d** (55.2 mg, 0.20 mmol) according to the general procedure; eluent: hexanes–PhH = 1:1. Yield 32.3 mg (58%). White solid; mp 86–87 °C (lit.<sup>5</sup> 90–92 °C); <sup>1</sup>H NMR (400 MHz, CDCl<sub>3</sub>) δ 8.01 (m, 2H), 7.56 (m, 2H), 7.48 (m, 2H), 6.89 (m, 2H), 4.38 (q, *J* = 7.1 Hz, 2H), 3.83 (s, 3H, MeO), 1.40 (t, *J* = 7.1 Hz, 3H); <sup>13</sup>C NMR (100 MHz, CDCl<sub>3</sub>) δ 166.1 (C<sub>quat</sub>), 159.9 (C<sub>quat</sub>), 133.2 (2C), 131.2 (2C), 129.4 (2C+C<sub>quat</sub>), 128.2 (C<sub>quat</sub>), 114.7 (C<sub>quat</sub>), 114.0 (2C), 92.4 (C≡C), 87.5 (C≡C), 61.1 (CH<sub>2</sub>), 55.3 (CH<sub>3</sub>O), 14.3 (CH<sub>3</sub>CH<sub>2</sub>).

### 3-[(4-Methoxyphenyl)ethynyl]benzonitrile (**3e**):

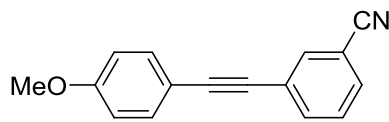 Prepared from 4-(4-methoxyphenyl)-2-methylbut-3-yn-2-ol **1a** (45.6 mg, 0.24 mmol) and 3-iodobenzonitrile **2e** (45.8 mg, 0.20 mmol) according to the general procedure; eluent: hexanes–PhH = 1:2. Yield 33 mg (71%). Prepared from 4-(4-methoxyphenyl)-2-methylbut-3-yn-2-ol **1a** (45.6

mg, 0.24 mmol) and 3-bromobenzonitrile **2m** (36.4 mg, 0.20 mmol) according to the general procedure; eluent: hexanes–PhH = 1:2. Yield 35.9 mg (77%). Beige solid; mp 66–67 °C; <sup>1</sup>H NMR (400 MHz, CDCl<sub>3</sub>) δ 7.77 (m, 1H, 2-CH<sub>Ar</sub>), 7.70 (m, 1H, 6-CH<sub>Ar</sub>), 7.57 (m, 1H, 4-CH<sub>Ar</sub>), 7.47 (m, 2H), 7.44 (m, 1H, 5-CH<sub>Ar</sub>), 6.89 (m, 2H), 3.83 (s, 3H); <sup>13</sup>C NMR (100 MHz, CDCl<sub>3</sub>) δ 160.1 (C<sub>quat</sub>), 135.4, 134.7, 133.2 (2C), 131.0, 129.2, 125.2 (C<sub>quat</sub>), 118.1 (C<sub>quat</sub>), 114.3 (C<sub>quat</sub>), 114.1 (2C), 112.8 (C<sub>quat</sub>), 91.9 (C≡C), 85.7 (C≡C), 55.3 (CH<sub>3</sub>); HRMS (MALDI-TOF, cinnamic acid) calcd for C<sub>16</sub>H<sub>11</sub>KNO [M+K]<sup>+</sup> 272.0472; found 272.0470.

### 1-Fluoro-2-[(4-methoxyphenyl)ethynyl]benzene (**3f**):

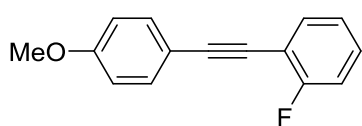

Prepared from 4-(4-methoxyphenyl)-2-methylbut-3-yn-2-ol **1a** (45.6 mg, 0.24 mmol) and 1-fluoro-2-iodobenzene **2f** (44.4 mg, 0.20 mmol) according to the general procedure; eluent: hexanes–PhH = 3:1. Yield 27.4 mg (61%). White solid; mp 57–58 °C (lit.<sup>6</sup> 56–57 °C); <sup>1</sup>H NMR (400 MHz, CDCl<sub>3</sub>) δ 7.53–7.47 (m, 3H), 7.28 (m, 1H), 7.14–7.06 (m, 2H), 6.88 (m, 2H), 3.83 (s, 3H).

### {3-[(4-Methoxyphenyl)ethynyl]phenyl}methanol (**3g**):

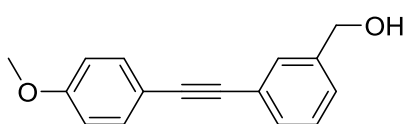

Prepared from 4-(4-methoxyphenyl)-2-methylbut-3-yn-2-ol **1a** (45.6 mg, 0.24 mmol) and (3-iodophenyl)methanol **2g** (46.8 mg, 0.20 mmol) according to the general procedure; eluent: PhH–MeCN = 40:1. Yield 45.9 mg (96%). Light-yellow solid; mp 59–62 °C; <sup>1</sup>H NMR (400 MHz, CDCl<sub>3</sub>) δ 7.52–7.40 (m, 4H), 7.35–7.26 (m, 2H), 6.86 (m, 2H), 4.65 (s, 2H), 3.80 (s, 3H), 2.06 (br s, 1H); <sup>13</sup>C (APT, 100 MHz, CDCl<sub>3</sub>) δ 159.6 (C<sub>quat</sub>), 141.0 (C<sub>quat</sub>), 133.0 (2C), 130.5, 129.8, 128.5, 126.4, 123.7 (C<sub>quat</sub>), 115.2 (C<sub>quat</sub>), 114.0 (2C), 89.5 (C<sub>quat</sub>), 87.9 (C<sub>quat</sub>), 64.8 (CH<sub>2</sub>), 55.2 (CH<sub>3</sub>). Spectral data are in accordance with the literature.<sup>7</sup>

### 1-[(4-Methoxyphenyl)ethynyl]-3,5-dimethylbenzene (**3h**):

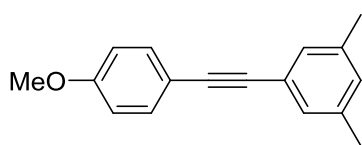

Prepared from 4-(4-methoxyphenyl)-2-methylbut-3-yn-2-ol **1a** (45.6 mg, 0.24 mmol) and 1-iodo-3,5-dimethylbenzene **2h** (46.4 mg, 0.20 mmol) according to the general procedure; eluent: hexanes–PhH = 3:1. Yield 38 mg (81%). White solid; mp 45–46 °C (lit.<sup>8</sup> 41–42 °C); <sup>1</sup>H NMR (400 MHz, CDCl<sub>3</sub>) δ 7.45 (m, 2H), 7.14 (br s, 2H), 6.94 (br s, 1H), 6.86 (m, 2H), 3.80 (s, 3H), 2.30 (s, 6H).

### 2-[(4-Methoxyphenyl)ethynyl]thiophene (**3i**):

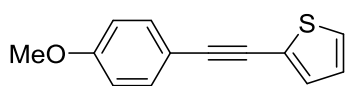

Prepared from 4-(4-methoxyphenyl)-2-methylbut-3-yn-2-ol **1a** (45.6 mg, 0.24 mmol) and 2-iodothiophene **2i** (42.0 mg, 0.20 mmol) according to the general procedure; eluent: hexanes–CH<sub>2</sub>Cl<sub>2</sub> = 1:1. Yield 31.2 mg (73%). Off-white solid; mp 55–57 °C (lit.<sup>9</sup> 53–54 °C); <sup>1</sup>H NMR (600 MHz, CDCl<sub>3</sub>) δ 7.44 (m, 2H), 7.25 (dd,

$J = 5.2, 1.1$  Hz, 1H), 7.24 (dd,  $J = 3.7, 1.1$  Hz, 1H), 6.99 (dd,  $J = 5.2, 3.7$  Hz, 1H), 6.87 (m, 2H), 3.82 (s, 3H).

### 3-[(4-Methoxyphenyl)ethynyl]pyridine (3j):

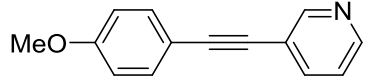 Prepared from 4-(4-methoxyphenyl)-2-methylbut-3-yn-2-ol **1a** (45.6 mg, 0.24 mmol) and 3-iodopyridine **2j** (41.0 mg, 0.20 mmol) according to the general procedure; eluent: hexanes–EtOAc = 1:1. Yield 36.9 mg (88%). Brownish solid; mp 53–55 °C (lit.<sup>10</sup> 51–52 °C); <sup>1</sup>H NMR (400 MHz, CDCl<sub>3</sub>)  $\delta$  8.75 (br s, 1H, 2-CH<sub>Py</sub>), 8.52 (d,  $J = 4.0$  Hz, 1H, 6-CH<sub>Py</sub>), 7.79 (m, 1H, 4-CH<sub>Py</sub>), 7.49 (m, 2H), 7.26 (dd,  $J = 7.9, 5.6$  Hz, 1H, 5-CH<sub>Py</sub>), 6.90 (m, 2H), 3.84 (s, 3H).

### 4-Chloro-6-[(4-methoxyphenyl)ethynyl]quinoline (3k):

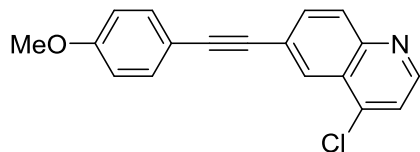 Prepared from 4-(4-methoxyphenyl)-2-methylbut-3-yn-2-ol **1a** (45.6 mg, 0.24 mmol) and 4-chloro-6-iodoquinoline **2k** (57.9 mg, 0.20 mmol) according to the general procedure; eluent: hexanes–EtOAc = 2:1. Yield 30 mg (51%). Light brown solid; mp 135–137 °C; <sup>1</sup>H NMR (400 MHz, CDCl<sub>3</sub>)  $\delta$  8.74 (d,  $J = 4.7$  Hz, 1H, 2-CH<sub>Ar</sub>), 8.36 (d,  $J = 1.7$  Hz, 1H, 5-CH<sub>Ar</sub>), 8.06 (d,  $J = 8.7$  Hz, 1H, 8-CH<sub>Ar</sub>), 7.83 (dd,  $J = 8.7, 1.7$  Hz, 1H, 7-CH<sub>Ar</sub>), 7.53 (m, 2H), 7.48 (d,  $J = 4.7$  Hz, 1H, 3-CH<sub>Ar</sub>), 6.91 (m, 2H), 3.84 (s, 3H); <sup>13</sup>C NMR (100 MHz, CDCl<sub>3</sub>)  $\delta$  159.9 (C<sub>quat</sub>), 150.0, 148.2 (C<sub>quat</sub>), 142.1 (C<sub>quat</sub>), 133.2 (2C), 133.0, 129.8, 126.9, 126.4 (C<sub>quat</sub>), 123.1 (C<sub>quat</sub>), 121.8, 114.7 (C<sub>quat</sub>), 114.1 (2C), 91.7 (C≡C), 87.6 (C≡C), 55.3 (CH<sub>3</sub>); HRMS (MALDI-TOF, cinnamic acid) calcd for C<sub>18</sub>H<sub>13</sub>ClNO [M+H]<sup>+</sup> 294.0680; found 294.0685.

### 4-[(4-Methoxyphenyl)ethynyl]benzotrile (3l):

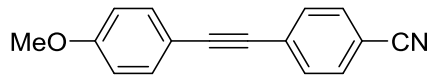 Prepared from 4-(4-methoxyphenyl)-2-methylbut-3-yn-2-ol **1a** (45.6 mg, 0.24 mmol) and 4-bromobenzotrile **2l** (36.4 mg, 0.20 mmol) according to the general procedure; eluent: hexanes–PhH = 1:2. Yield 36.9 mg (79%). Off-white solid; mp 121–123 °C (lit.<sup>11</sup> 121.7–122.5 °C); <sup>1</sup>H NMR (400 MHz, CDCl<sub>3</sub>)  $\delta$  7.62 (m, 2H), 7.57 (m, 2H), 7.48 (m, 2H), 6.90 (m, 2H), 3.84 (s, 3H).

### 2-[(4-Methoxyphenyl)ethynyl]benzotrile (3m):

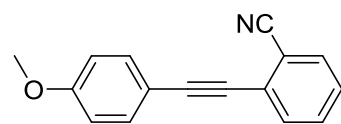 Prepared from 4-(4-methoxyphenyl)-2-methylbut-3-yn-2-ol **1a** (45.6 mg, 0.24 mmol) and 2-bromobenzotrile **2n** (36.4 mg, 0.20 mmol) according to the general procedure; eluent: hexanes–PhH = 1:2. Yield 40.9 mg (88%). Light-yellow solid; mp 79–81 °C (lit.<sup>12</sup> 78–79 °C); <sup>1</sup>H NMR (400 MHz, CDCl<sub>3</sub>)  $\delta$  7.65 (ddd,  $J = 7.8, 1.3, 0.6$  Hz, 1H), 7.61–7.51 (m, 4H), 7.37 (ddd,  $J = 7.8, 7.4, 1.5$  Hz, 1H), 6.89 (m, 2H), 3.84 (s, 3H).

### 1-[(4-Methoxyphenyl)ethynyl]-3,5-bis(trifluoromethyl)benzene (3n):

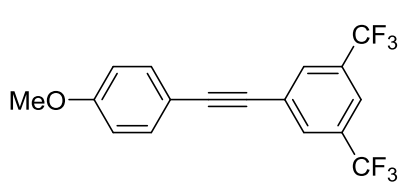

Prepared from 4-(4-methoxyphenyl)-2-methylbut-3-yn-2-ol **1a** (45.6 mg, 0.24 mmol) and 3,5-bis(trifluoromethyl)benzene **2p** (25.5  $\mu$ L, 0.20 mmol) according to the general procedure; eluent: hexanes–PhH = 1:1. Yield 42 mg (61%). White solid; mp 68–69  $^{\circ}$ C (lit.<sup>13</sup> 67.9–68.3  $^{\circ}$ C);  $^1$ H NMR (400 MHz,  $\text{CDCl}_3$ )  $\delta$  7.92 (br s, 2H), 7.78 (br s, 1H), 7.49 (m, 2H), 6.91 (m, 2H), 3.84 (s, 3H).

### 1-{4-[(4-Methoxyphenyl)ethynyl]phenyl}ethanone (3o):

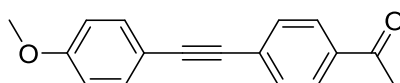

Prepared from 4-(4-methoxyphenyl)-2-methylbut-3-yn-2-ol **1a** (45.6 mg, 0.24 mmol) and 4-bromoacetophenone **2q** (39.8 mg, 0.20 mmol) according to the general procedure; eluent: PhH–MeCN = 40:1. Yield 47.2 mg (94%). Light-yellow solid; mp 127–129  $^{\circ}$ C (lit.<sup>14</sup> 125–128  $^{\circ}$ C);  $^1$ H NMR (400 MHz,  $\text{CDCl}_3$ )  $\delta$  7.93 (m, 2H), 7.58 (m, 2H), 7.49 (m, 2H), 6.91 (m, 2H), 3.84 (s, 3H, MeO), 2.61 (s, 3H, Ac).

### 3-[(4-Methoxyphenyl)ethynyl]quinoline (3p):

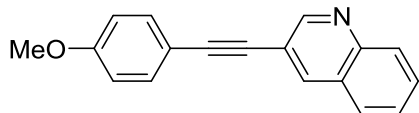

Prepared from 4-(4-methoxyphenyl)-2-methylbut-3-yn-2-ol **1a** (45.6 mg, 0.24 mmol) and 3-bromoquinoline **2r** (27.1  $\mu$ L, 0.20 mmol) according to the general procedure; eluent: hexanes–EtOAc = 1:1. Yield 41.3 mg (80%). Off-white solid;  $^1$ H NMR (400 MHz,  $\text{CDCl}_3$ )  $\delta$  8.99 (d,  $J$  = 2.0 Hz, 1H, 2- $\text{CH}_{\text{Ar}}$ ), 8.26 (d,  $J$  = 2.0 Hz, 1H, 4- $\text{CH}_{\text{Ar}}$ ), 8.09 (m, 1H), 7.78 (m, 1H), 7.70 (m, 1H), 7.55 (m, 1H), 7.53 (m, 2H), 6.91 (m, 2H), 3.83 (s, 3H). Spectral data are in accordance with the literature.<sup>15</sup>

### 2-[(4-Methoxyphenyl)ethynyl]pyridine (3q):

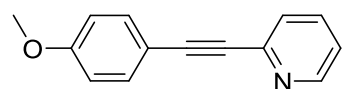

Prepared from 4-(4-methoxyphenyl)-2-methylbut-3-yn-2-ol **1a** (45.6 mg, 0.24 mmol) and 2-bromopyridine **2s** (31.6 mg, 0.20 mmol) according to the general procedure; eluent: hexanes–EtOAc = 3:1. Yield 25.3 mg (61%). Yellow liquid;  $^1$ H NMR (400 MHz,  $\text{CDCl}_3$ )  $\delta$  8.60 (ddd,  $J$  = 4.9, 1.8, 1.1 Hz, 1H), 7.66 (td,  $J$  = 7.7, 1.8 Hz, 1H), 7.54 (m, 2H), 7.49 (dt,  $J$  = 7.7, 1.1 Hz, 1H), 7.21 (ddd,  $J$  = 7.7, 4.9, 1.1 Hz, 1H), 6.89 (m, 2H), 3.83 (s, 3H). Spectral data are in accordance with the literature.<sup>10</sup>

### 2-[(4-Methoxyphenyl)ethynyl]pyrimidine (3r):

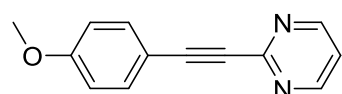

Prepared from 4-(4-methoxyphenyl)-2-methylbut-3-yn-2-ol **1a** (45.6 mg, 0.24 mmol) and 2-bromopyrimidine **2t** (31.8 mg, 0.20 mmol) according to the general procedure; eluent: hexanes–EtOAc = 2:1. Yield 6.8 mg (16%). White solid; mp 70–73  $^{\circ}$ C (lit.<sup>10</sup> 70–72  $^{\circ}$ C);  $^1$ H NMR (400 MHz,  $\text{CDCl}_3$ )  $\delta$  8.74 (d,  $J$  = 4.9 Hz, 2H), 7.62 (m, 2H), 7.22 (t,  $J$  = 4.9 Hz, 1H), 6.91 (m, 2H), 3.84 (s, 3H).

### 5-[(4-Methoxyphenyl)ethynyl]pyrimidine (3s):

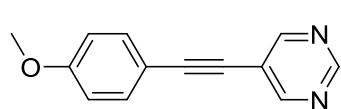

Prepared from 4-(4-methoxyphenyl)-2-methylbut-3-yn-2-ol **1a** (45.6 mg, 0.24 mmol) and 5-bromopyrimidine **2u** (31.8 mg, 0.20 mmol) according to the general procedure; eluent: hexanes–EtOAc = 3:1. Yield 30.2 mg (72%). Light-yellow solid; mp 115–117 °C; <sup>1</sup>H NMR (400 MHz, CDCl<sub>3</sub>) δ 9.12 (s, 1H), 8.83 (s, 2H), 7.50 (m, 2H), 6.91 (m, 2H), 3.84 (s, 3H); <sup>13</sup>C (100 MHz, CDCl<sub>3</sub>) δ 160.3 (C<sub>quat</sub>), 158.4 (2C), 156.3, 133.3 (2C), 120.2 (C<sub>quat</sub>), 114.2 (2C), 113.7 (C<sub>quat</sub>), 96.5 (C<sub>quat</sub>), 81.4 (C<sub>quat</sub>), 55.3. Spectral data are in accordance with the literature.<sup>16</sup>

### 2-[(4-Methoxyphenyl)ethynyl]-1-methyl-1H-benzimidazole (3t):

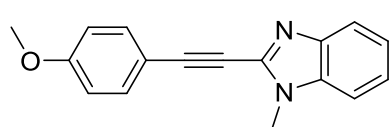

Prepared from 4-(4-methoxyphenyl)-2-methylbut-3-yn-2-ol **1a** (45.6 mg, 0.24 mmol) and 2-bromo-1-methyl-1H-benzimidazole **2v** (42.2 mg, 0.20 mmol) according to the general procedure; eluent: hexanes–EtOAc = 3:1. Yield 20.5 mg (39%). Light-yellow solid; mp 160–163 °C; <sup>1</sup>H NMR (400 MHz, CDCl<sub>3</sub>) δ 7.77 (m, 1H), 7.57 (m, 2H), 7.33–7.27 (m, 3H), 6.91 (m, 2H), 3.90 (s, 3H), 3.84 (s, 3H). Spectral data are in accordance with the literature.<sup>17</sup>

### 1-Methyl-4-[(4-nitrophenyl)ethynyl]benzene (3u):

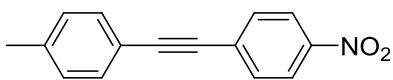

Prepared from 2-methyl-4-(4-methylphenyl)but-3-yn-2-ol **1b** (41.8 mg, 0.24 mmol) and 1-iodo-4-nitrobenzene **2a** (49.8 mg, 0.20 mmol) according to the general procedure; eluent: hexanes–CH<sub>2</sub>Cl<sub>2</sub> = 3:1. Yield 30.8 mg (65%). Yellow solid; mp 153–155 °C (lit.<sup>18</sup> 154–156 °C); <sup>1</sup>H NMR (400 MHz, CDCl<sub>3</sub>) δ 8.20 (m, 2H), 7.64 (m, 2H), 7.45 (m, 2H), 7.19 (m, 2H), 2.39 (s, 3H).

### 3-[(4-Nitrophenyl)ethynyl]pyridine (3v):

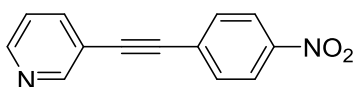

Prepared from 2-methyl-4-pyridine-3-ylbut-3-yn-2-ol **1c** (38.6 mg, 0.24 mmol) and 1-iodo-4-nitrobenzene **2a** (49.8 mg, 0.20 mmol) according to the general procedure. Yield 36.3 mg (81%). Light orange solid; mp 135–136 °C (lit.<sup>18</sup> 107–109 °C); <sup>1</sup>H NMR (400 MHz, CDCl<sub>3</sub>) δ 8.87 (br s, 1H), 8.69 (br s, 1H), 8.26 (m, 2H), 7.86 (br d, *J* = 7.6 Hz, 1H), 7.70 (m, 2H), 7.37 (br s, 1H).

### 3-[(4-Nitrophenyl)ethynyl]quinoline (3w):

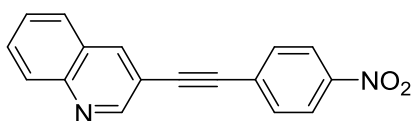

Prepared from 4-quinolin-3-yl-2-methylbut-3-yn-2-ol **1d** (50.6 mg, 0.24 mmol) and 1-iodo-4-nitrobenzene **2a** (49.8 mg, 0.20 mmol) according to the general procedure; eluent: CH<sub>2</sub>Cl<sub>2</sub>. Yield 45 mg (82%). Light brown solid; mp 192–194 °C; <sup>1</sup>H NMR (400 MHz, DMSO-*d*<sub>6</sub>-CCl<sub>4</sub>) δ 9.03 (d, *J* = 1.5 Hz, 1H, 2-CH<sub>Ar</sub>), 8.69 (d, *J* = 1.5 Hz, 1H, 4-CH<sub>Ar</sub>), 8.29 (m, 2H), 8.07–8.00 (m, 2H, 5,8-CH<sub>Ar</sub>), 7.88 (m, 2H), 7.83 (m, 1H), 7.68 (m, 1H); <sup>13</sup>C NMR (100 MHz, DMSO-*d*<sub>6</sub>-CCl<sub>4</sub>)



$\delta$  151.4, 147.1 ( $C_{\text{quat}}$ ), 146.6 ( $C_{\text{quat}}$ ), 139.2, 132.7 (2C), 131.0, 128.9, 128.6 ( $C_{\text{quat}}$ ), 128.2, 127.6, 126.7 ( $C_{\text{quat}}$ ), 124.0 (2C), 115.5 ( $C_{\text{quat}}$ ), 91.5 ( $C\equiv C$ ), 90.5 ( $C\equiv C$ ); HRMS (MALDI-TOF, cinnamic acid) calcd for  $C_{17}H_{11}N_2O_2$   $[M+H]^+$  275.0815; found 275.0818.

#### [(4-Nitrophenyl)ethynyl]ferrocene (**3x**):

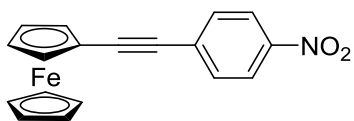

Prepared from 4-ferrocenyl-2-methylbut-3-yn-2-ol **1e** (64.4 mg, 0.24 mmol) and 1-iodo-4-nitrobenzene **2a** (49.8 mg, 0.20 mmol) according to the general procedure; eluent: hexanes- $CH_2Cl_2$  = 3:1.

Yield 29.9 mg (45%). Dark red solid; mp 211–212 °C;  $^1H$  NMR (400 MHz,  $CDCl_3$ )  $\delta$  8.19 (m, 2H), 7.59 (m, 2H), 4.55 (m, 2H), 4.32 (m, 2H), 4.26 (s, 5H);  $^{13}C$  NMR (100 MHz,  $CDCl_3$ )  $\delta$  146.4 ( $C_{\text{quat}}$ ), 131.8 (2C), 131.0 ( $C_{\text{quat}}$ ), 123.6 (2C), 95.2 ( $C\equiv C$ ), 84.4 ( $C\equiv C$ ), 71.8 (2C), 70.1 (5C), 69.5 (2C), 63.6 ( $C_{\text{quat}}$ ); HRMS (MALDI-TOF, dithranol) calcd for  $C_{18}H_{13}FeNO_2$   $[M]^+$  331.0290; found 331.0282.

#### 4-[(4-Nitrophenyl)ethynyl]benzonitrile (**3y**):

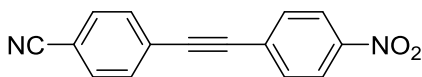

Prepared from 4-(3-hydroxy-3-methylbut-1-yn-1-yl)benzonitrile **1f** (44.5 mg, 0.24 mmol) and 1-iodo-4-nitrobenzene **2a** (49.8 mg, 0.20 mmol) according to the general procedure; eluent: hexanes- $CH_2Cl_2$  = 1:1. Yield 32.2 mg (65%). Beige solid; mp 211–213 °C (lit.<sup>19</sup> 212–214 °C);  $^1H$  NMR (400 MHz,  $CDCl_3$ )  $\delta$  8.25 (m, 2H), 7.73–7.63 (m, 6H).

#### 1,1'-Ethyne-1,2-diylbis(4-nitrobenzene) (**3z**):

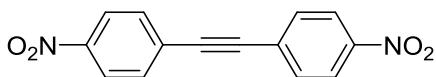

Prepared from 2-methyl-4-(4-nitrophenyl)but-3-yn-2-ol **1g** (49.3 mg, 0.24 mmol) and 1-iodo-4-nitrobenzene **2a** (49.8 mg, 0.20 mmol) according to the general procedure; eluent: hexanes- $CH_2Cl_2$  = 1:1. Yield 33.5 mg (62%). Pale yellow solid; mp 213–214 °C (lit.<sup>20</sup> 214–215 °C);  $^1H$  NMR (400 MHz,  $CDCl_3$ )  $\delta$  8.27 (m, 4H), 7.72 (m, 4H).

#### 1-Methoxy-4-[4-phenylbut-3-en-1-yn-1-yl]benzene (*E:Z* = 10:1) (**5a**):

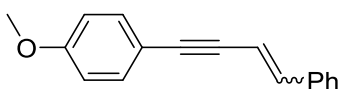

Prepared from 4-(4-methoxyphenyl)-2-methylbut-3-yn-2-ol **1a** (45.6 mg, 0.24 mmol) and  $\beta$ -bromostyrene **4a** (36.6 mg, 0.20 mmol, *E:Z* = 85:15) according to the general procedure; eluent: hexanes-PhH = 4:1. Yield 40.5 mg (87%). White solid (*E:Z* = 10:1).

1-Methoxy-4-[(3*E*)-4-phenylbut-3-en-1-yn-1-yl]benzene:  $^1H$  NMR (400 MHz,  $CDCl_3$ )  $\delta$  7.44–7.38 (m, 4H), 7.36–7.30 (m, 2H), 7.30–7.25 (m, 1H), 7.00 (d,  $J$  = 16.2 Hz, 1H), 6.86 (m, 2H), 6.38 (d,  $J$  = 16.2 Hz, 1H), 3.81 (s, 3H). Spectral data are in accordance with the literature.<sup>20</sup>

1-Methoxy-4-[(3*Z*)-4-phenylbut-3-en-1-yn-1-yl]benzene: partial  $^1\text{H}$  NMR (400 MHz,  $\text{CDCl}_3$ )  $\delta$  7.92 (m, 2H), 6.88 (m, 2H), 6.66 (d,  $J = 11.9$  Hz, 1H), 5.90 (d,  $J = 11.9$  Hz, 1H), 3.82 (s, 3H). Spectral data are in accordance with the literature.<sup>21</sup>

**1,1'-(*IE*)-But-1-en-3-yne-1,4-diylbis(4-methoxybenzene) and 1,1'-(*IZ*)-but-1-en-3-yne-1,4-diylbis(4-methoxybenzene) (5b):**

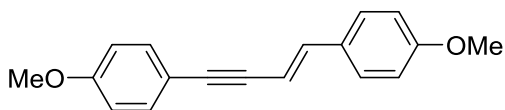

Prepared from 4-(4-methoxyphenyl)-2-methylbut-3-yn-2-ol **1a** (45.6 mg, 0.24 mmol) and (*E*)-1-(2-bromovinyl)-4-methoxybenzene **4b** (42.6 mg, 0.20

mmol) according to the general procedure; eluent: hexanes–PhH = 3:1. Yield 41.7 mg (79%). White plates; mp 151–153 °C (lit.<sup>22</sup> 153–155 °C);  $^1\text{H}$  NMR (400 MHz,  $\text{CDCl}_3$ )  $\delta$  7.41 (m, 2H), 7.37 (m, 2H), 6.97 (d,  $J = 16.2$  Hz, 1H), 6.87 (m, 4H), 6.24 (d,  $J = 16.2$  Hz, 1H), 3.829 (s, 3H), 3.826 (s, 3H).

Mixture of *E/Z* isomers (2:5) was prepared by the same procedure from 1-(2-bromovinyl)-4-methoxybenzene (*E/Z* = 1:10, 42.6 mg, 0.20 mmol). Yield 13.4 mg (25%). (*Z*)-isomer:  $^1\text{H}$  NMR (400 MHz,  $\text{CDCl}_3$ )  $\delta$  7.90 (m, 2H), 7.43 (m, 2H), 6.90 (m, 4H), 6.60 (d,  $J = 11.9$  Hz, 1H), 5.79 (d,  $J = 11.9$  Hz, 1H), 3.84 (s, 3H), 3.83 (s, 3H). Spectral data are in accordance with the literature.<sup>22</sup>

**1-(Cyclohex-1-en-1-ylethynyl)-4-methoxybenzene (5c):**

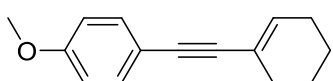

Prepared from 4-(4-methoxyphenyl)-2-methylbut-3-yn-2-ol **1a** (45.6 mg, 0.24 mmol) and 1-bromocyclohexene **4c** (32.2 mg, 0.20 mmol)

according to the general procedure; eluent: hexanes–PhH = 5:1. Yield 7.6 mg (18%). White glass;  $^1\text{H}$  NMR (400 MHz,  $\text{CDCl}_3$ )  $\delta$  7.35 (m, 2H), 6.82 (m, 2H), 6.17 (m, 1H), 3.80 (s, 3H), 2.25–2.19 (m, 2H), 2.17–2.10 (m, 2H), 1.71–1.57 (m, 4H). Spectral data are in accordance with the literature.<sup>23</sup>

**3-[4-(4-Methoxyphenyl)buta-1,3-diyn-1-yl]quinoline (5d):**

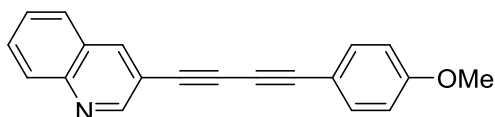

Prepared from 4-quinolin-3-yl-2-methylbut-3-yn-2-ol **1d** (50.6 mg, 0.24 mmol) and 1-(chloroethynyl)-4-methoxybenzene **4d** (33.3 mg, 0.20 mmol) according to

the general procedure; eluent: hexanes–EtOAc = 3:1. Yield 24.1 mg (43%). Light-yellow solid; mp 112–114 °C;  $^1\text{H}$  NMR (400 MHz,  $\text{CDCl}_3$ )  $\delta$  8.96 (d,  $J = 1.5$  Hz, 1H, 2- $\text{CH}_{\text{Ar}}$ ), 8.29 (d,  $J = 1.5$  Hz, 1H, 4- $\text{CH}_{\text{Ar}}$ ), 8.09 (m, 1H), 7.78 (m, 1H), 7.73 (m, 1H), 7.57 (m, 1H), 7.50 (m, 2H), 6.87 (m, 2H), 3.83 (s, 3H);  $^{13}\text{C}$  (100 MHz,  $\text{CDCl}_3$ )  $\delta$  160.6 ( $\text{C}_{\text{quat}}$ ), 152.2, 146.9 ( $\text{C}_{\text{quat}}$ ), 139.5, 134.2 (2C), 130.5, 129.4, 127.6, 127.5, 127.0 ( $\text{C}_{\text{quat}}$ ), 116.3 ( $\text{C}_{\text{quat}}$ ), 114.2 (2C), 113.2 ( $\text{C}_{\text{quat}}$ ), 83.2 ( $\text{C}_{\text{quat}}$ ),

78.2 (C<sub>quat</sub>), 77.4 (C<sub>quat</sub>), 72.4 (C<sub>quat</sub>), 55.3; HRMS (ESI-TOF) calcd for C<sub>20</sub>H<sub>14</sub>NO [M+H]<sup>+</sup> 284.1070; found 284.1073.

**17-[(4-Methoxyphenyl)ethynyl]androsta-4,16-dien-3-one (5e):**

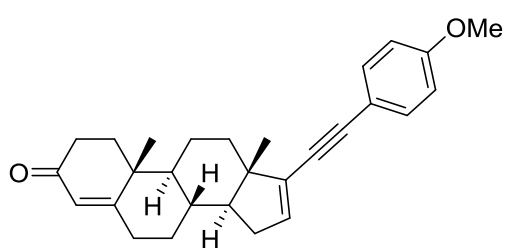

Prepared from 4-(4-methoxyphenyl)-2-methylbut-3-yn-2-ol **1a** (45.6 mg, 0.24 mmol) and 17-iodoandrosta-3,16-dien-3-one **4e** (79.2 mg, 0.20 mmol) according to the general procedure; eluent: hexanes–EtOAc = 4:1. Yield 67.0 mg (84%). White solid; mp 221–223 °C

(lit.<sup>24</sup> 221–223 °C); <sup>1</sup>H NMR (400 MHz, CDCl<sub>3</sub>) δ 7.37 (m, 2H), 6.83 (m, 2H), 6.04 (dd, *J* = 3.3, 2.1 Hz, 1H, 16-CH), 5.74 (m, 1H, 4-CH), 3.80 (s, 3H, CH<sub>3</sub>O), 2.49–2.21 (m, 5H), 2.11–1.84 (m, 4H), 1.81–1.64 (m, 3H), 1.60–1.37 (m, 3H), 1.22 (s, 3H, CH<sub>3</sub>), 1.18–0.98 (m, 2H), 0.94 (s, 3H, CH<sub>3</sub>).

**3-[(4-Methoxyphenyl)ethynyl]androsta-3,5-dien-17β-ol (5f):**

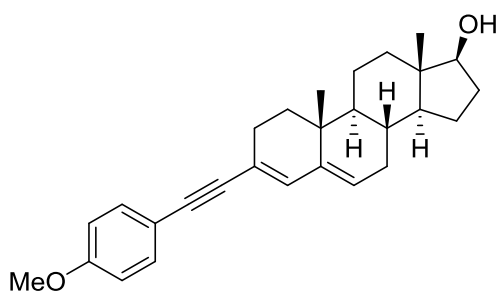

Prepared from 4-(4-methoxyphenyl)-2-methylbut-3-yn-2-ol **1a** (45.6 mg, 0.24 mmol) and 3-iodoandrosta-3,5-dien-17β-ol **4f** (79.7 mg, 0.20 mmol) according to the general procedure; eluent: hexanes–EtOAc = 3:1. Yield 67.3 mg (84%). White solid; mp 213–215 °C; <sup>1</sup>H NMR

(400 MHz, CDCl<sub>3</sub>–CD<sub>3</sub>OD) δ 7.37 (m, 2H), 6.83 (m, 2H), 6.34 (d, *J* = 2.1 Hz, 1H, 4-CH), 5.51 (m, 1H, 6-CH), 3.81 (s, 3H, CH<sub>3</sub>O), 3.64 (t, *J* = 8.6 Hz, 1H, 17-CHOH), 2.46–2.18 (m, 3H), 2.06 (m, 1H), 1.89–1.82 (m, 2H), 1.76–1.57 (m, 4H), 1.52–1.18 (m, 5H), 1.16–0.96 (m, 2H), 0.98 (s, 3H, CH<sub>3</sub>), 0.78 (s, 3H, CH<sub>3</sub>); <sup>13</sup>C NMR (100 MHz, CDCl<sub>3</sub>–CD<sub>3</sub>OD) δ 159.1 (C<sub>quat</sub>), 141.4 (C<sub>quat</sub>), 134.7, 132.7 (2C), 125.6, 117.3 (C<sub>quat</sub>), 115.8 (C<sub>quat</sub>), 113.8 (2C), 90.1 (C≡C), 89.1 (C≡C), 81.5 (17-CHOH), 55.2 (CH<sub>3</sub>O), 51.4, 48.1, 42.7 (C<sub>quat</sub>), 36.4, 34.5 (C<sub>quat</sub>), 33.5, 31.7, 31.5, 30.1, 27.0, 23.2, 20.5, 19.0, 10.9; HRMS (MALDI-TOF, dithranol) calcd for C<sub>28</sub>H<sub>35</sub>O<sub>2</sub> [M+H]<sup>+</sup> 403.2632; found 403.2638.

## Copies of NMR spectra

### 1-Methoxy-4-[(4-nitrophenyl)ethynyl]benzene (3a)

$^1\text{H}$  NMR (400 MHz,  $\text{CDCl}_3$ )

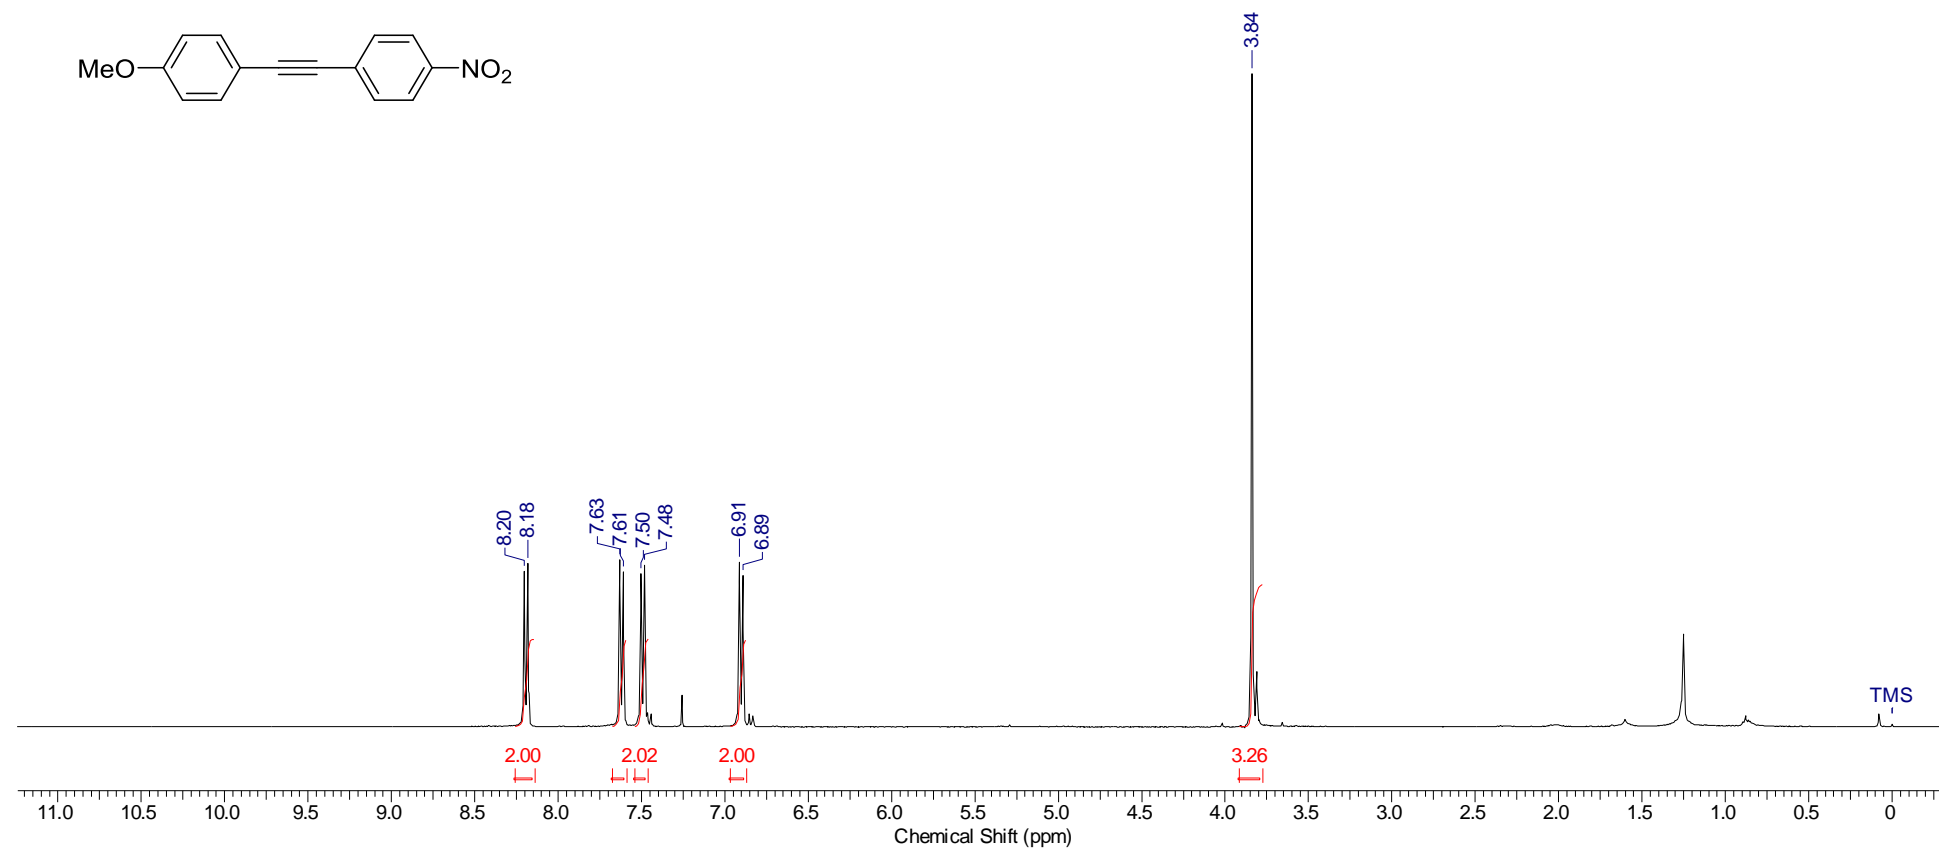

**1-Methoxy-4-[(4-methylphenyl)ethynyl]benzene (3b)**

<sup>1</sup>H NMR (600 MHz, CDCl<sub>3</sub>)

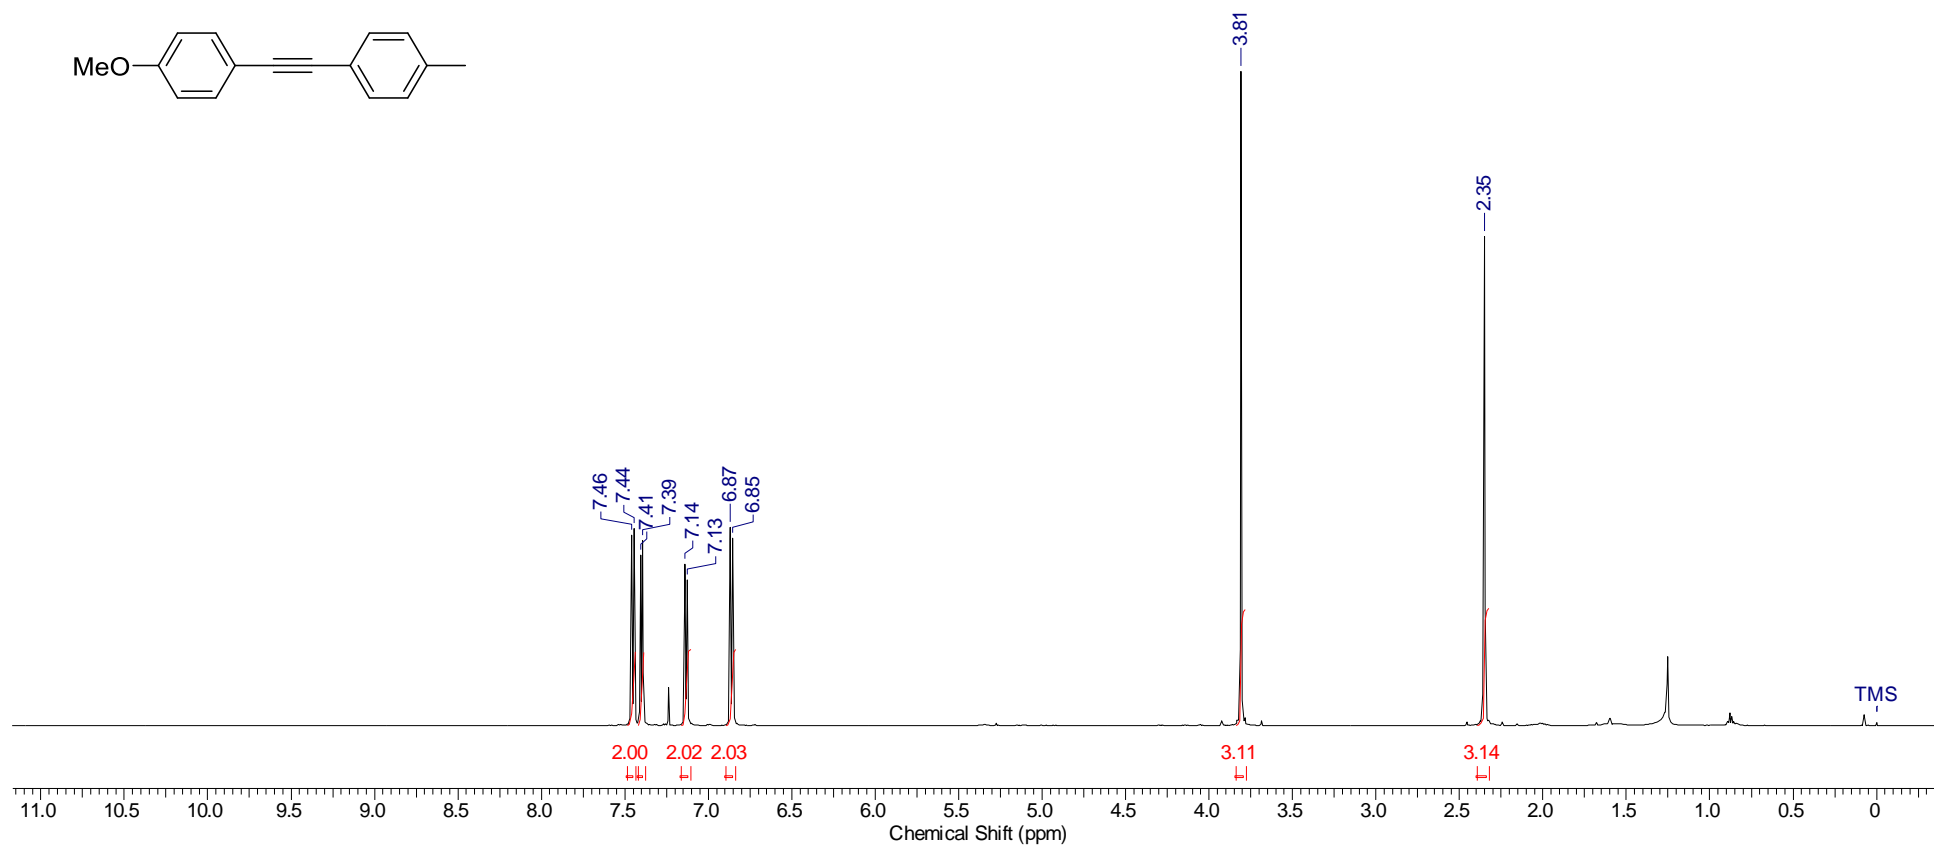

**1,2-Dichloro-4-[(4-methoxyphenyl)ethynyl]benzene (3c)**

$^1\text{H}$  NMR (400 MHz,  $\text{CDCl}_3$ )

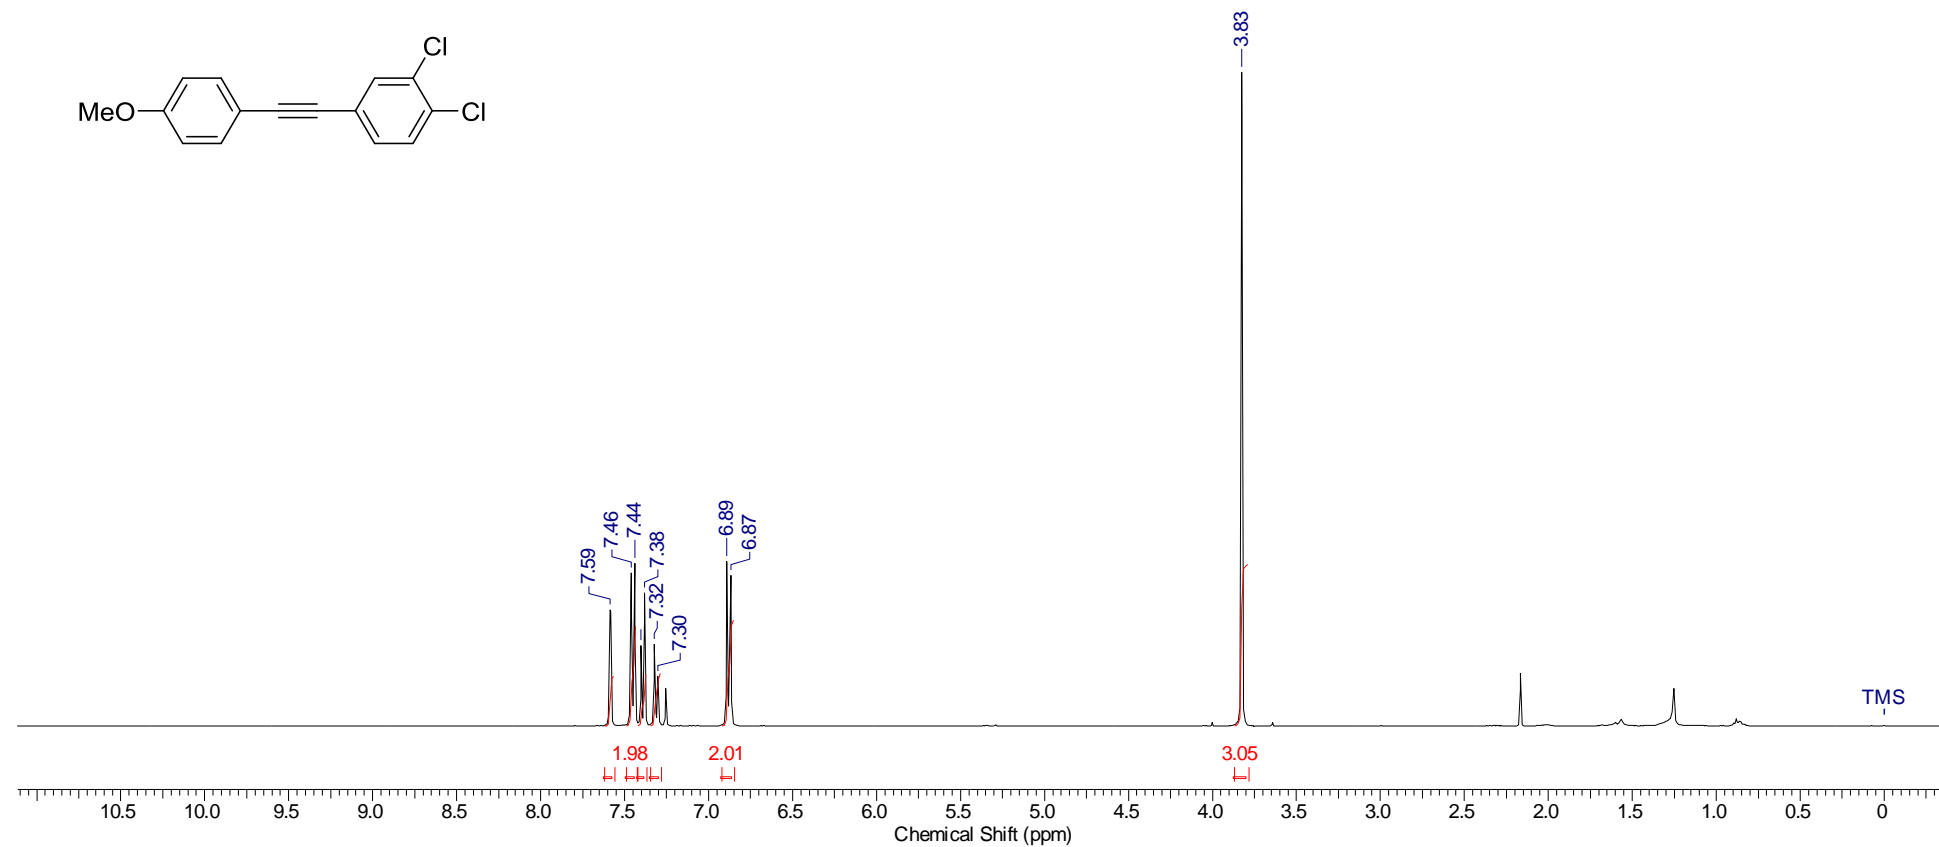

### 1,2-Dichloro-4-[(4-methoxyphenyl)ethynyl]benzene (3c)

$^{13}\text{C}$  NMR (400 MHz,  $\text{CDCl}_3$ )

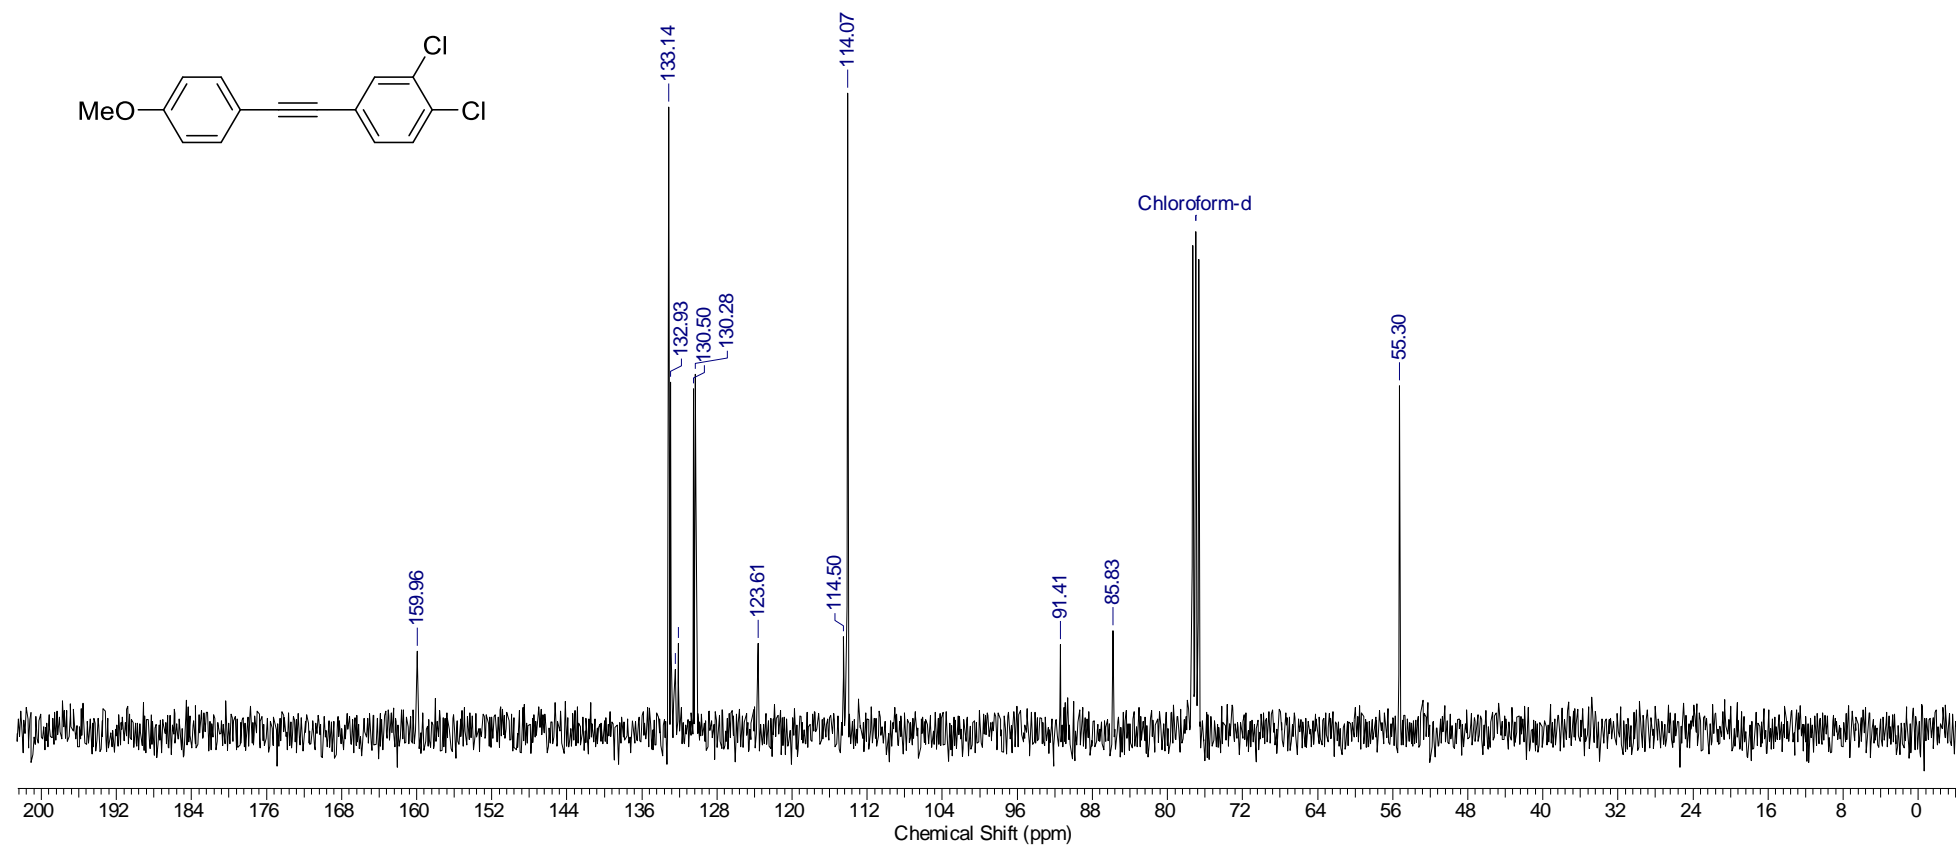

Ethyl 4-[(4-methoxyphenyl)ethynyl]benzoate (3d)

$^1\text{H}$  NMR (400 MHz,  $\text{CDCl}_3$ )

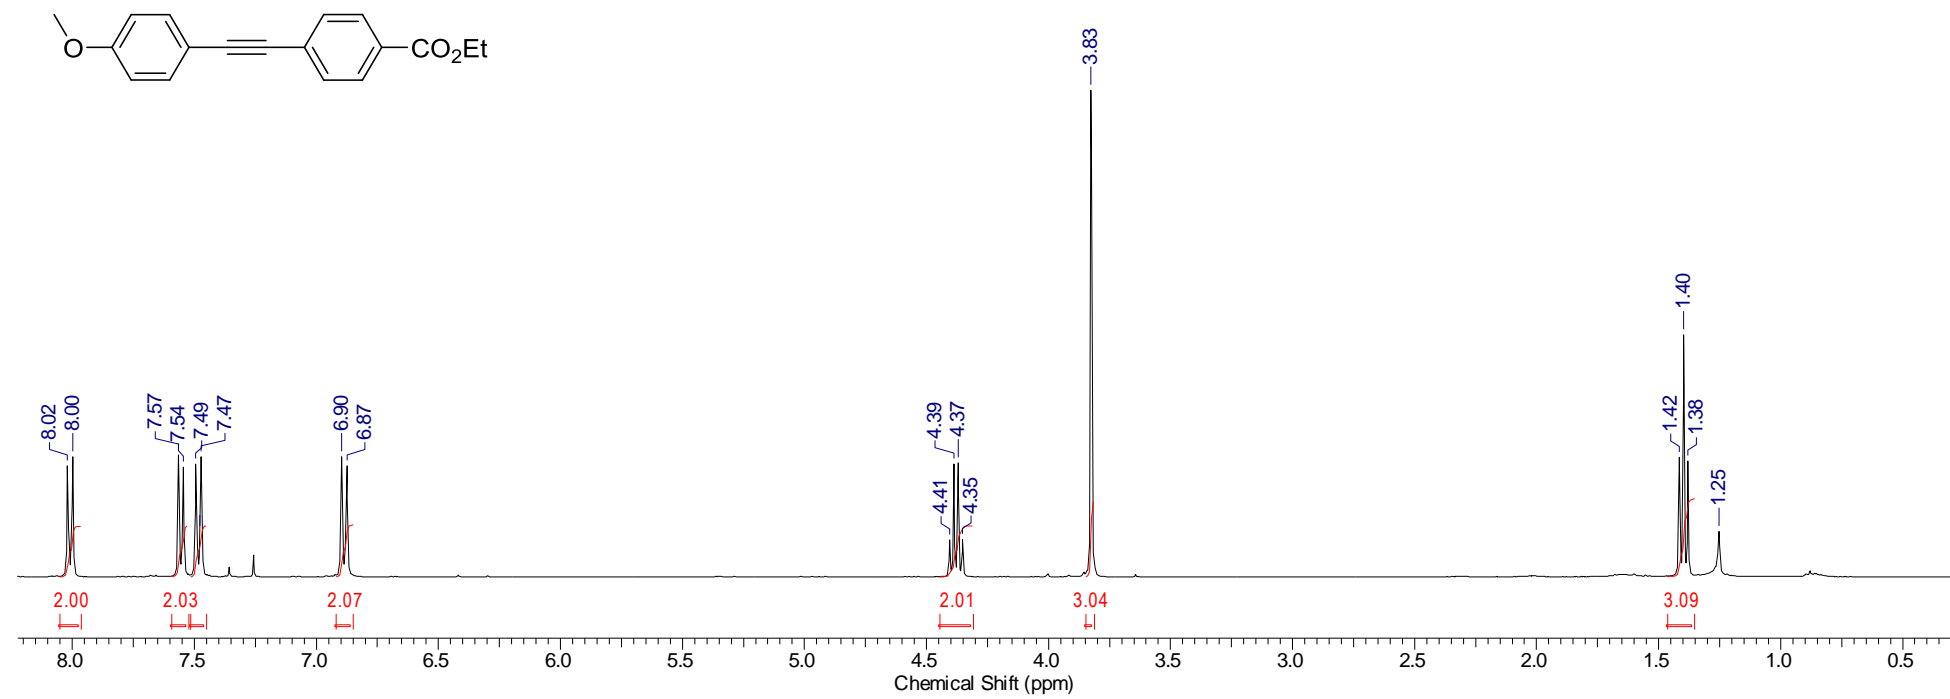



### Ethyl 4-[(4-methoxyphenyl)ethynyl]benzoate (3d)

$^{13}\text{C}$  NMR (100 MHz,  $\text{CDCl}_3$ )

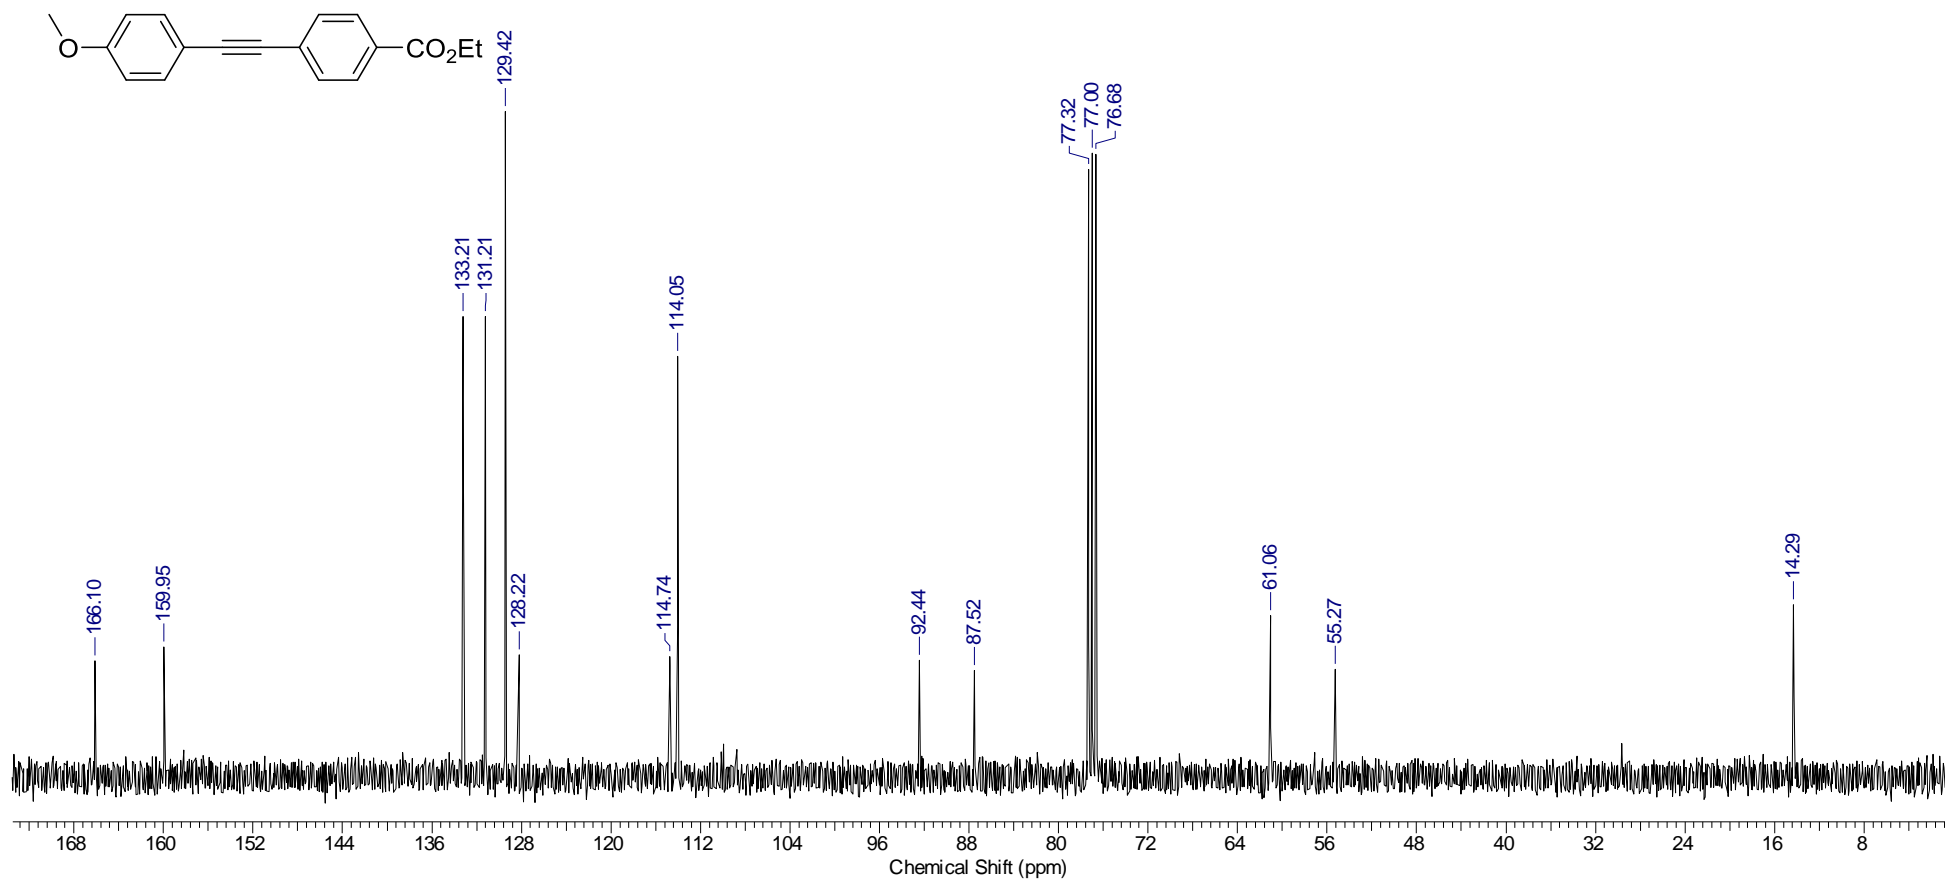

### 3-[(4-Methoxyphenyl)ethynyl]benzonitrile (3e)

$^1\text{H}$  NMR (400 MHz,  $\text{CDCl}_3$ )

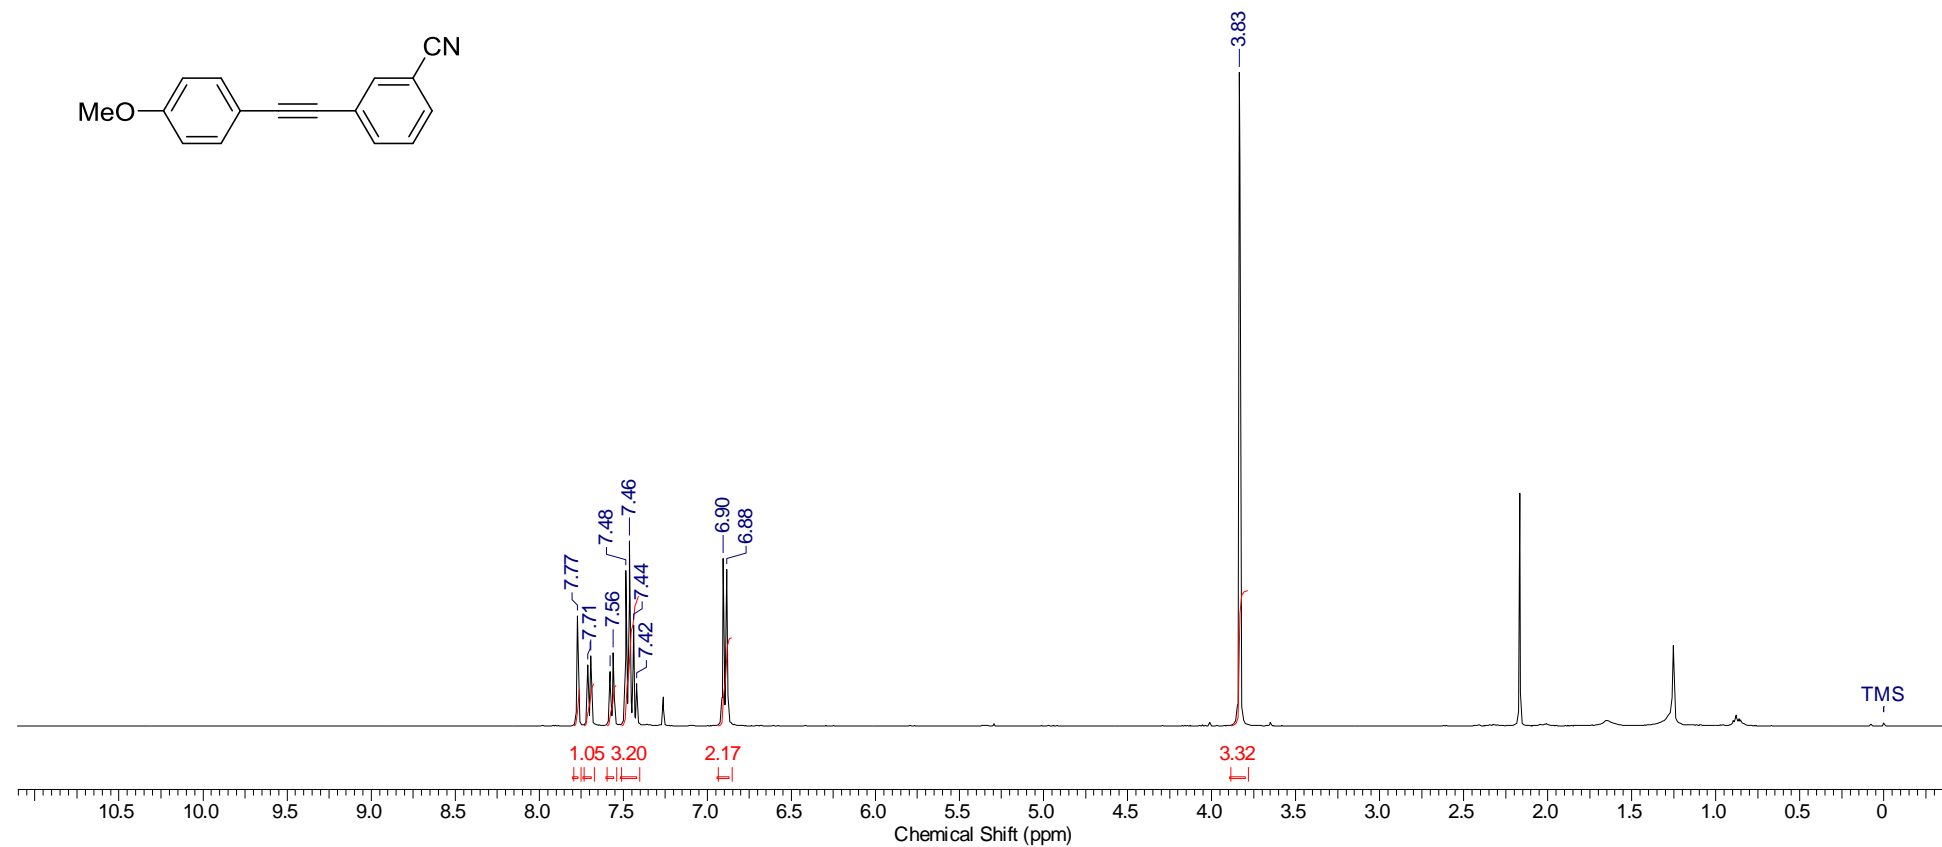

### 3-[(4-Methoxyphenyl)ethynyl]benzonitrile (3e)

$^{13}\text{C}$  NMR (100 MHz,  $\text{CDCl}_3$ )

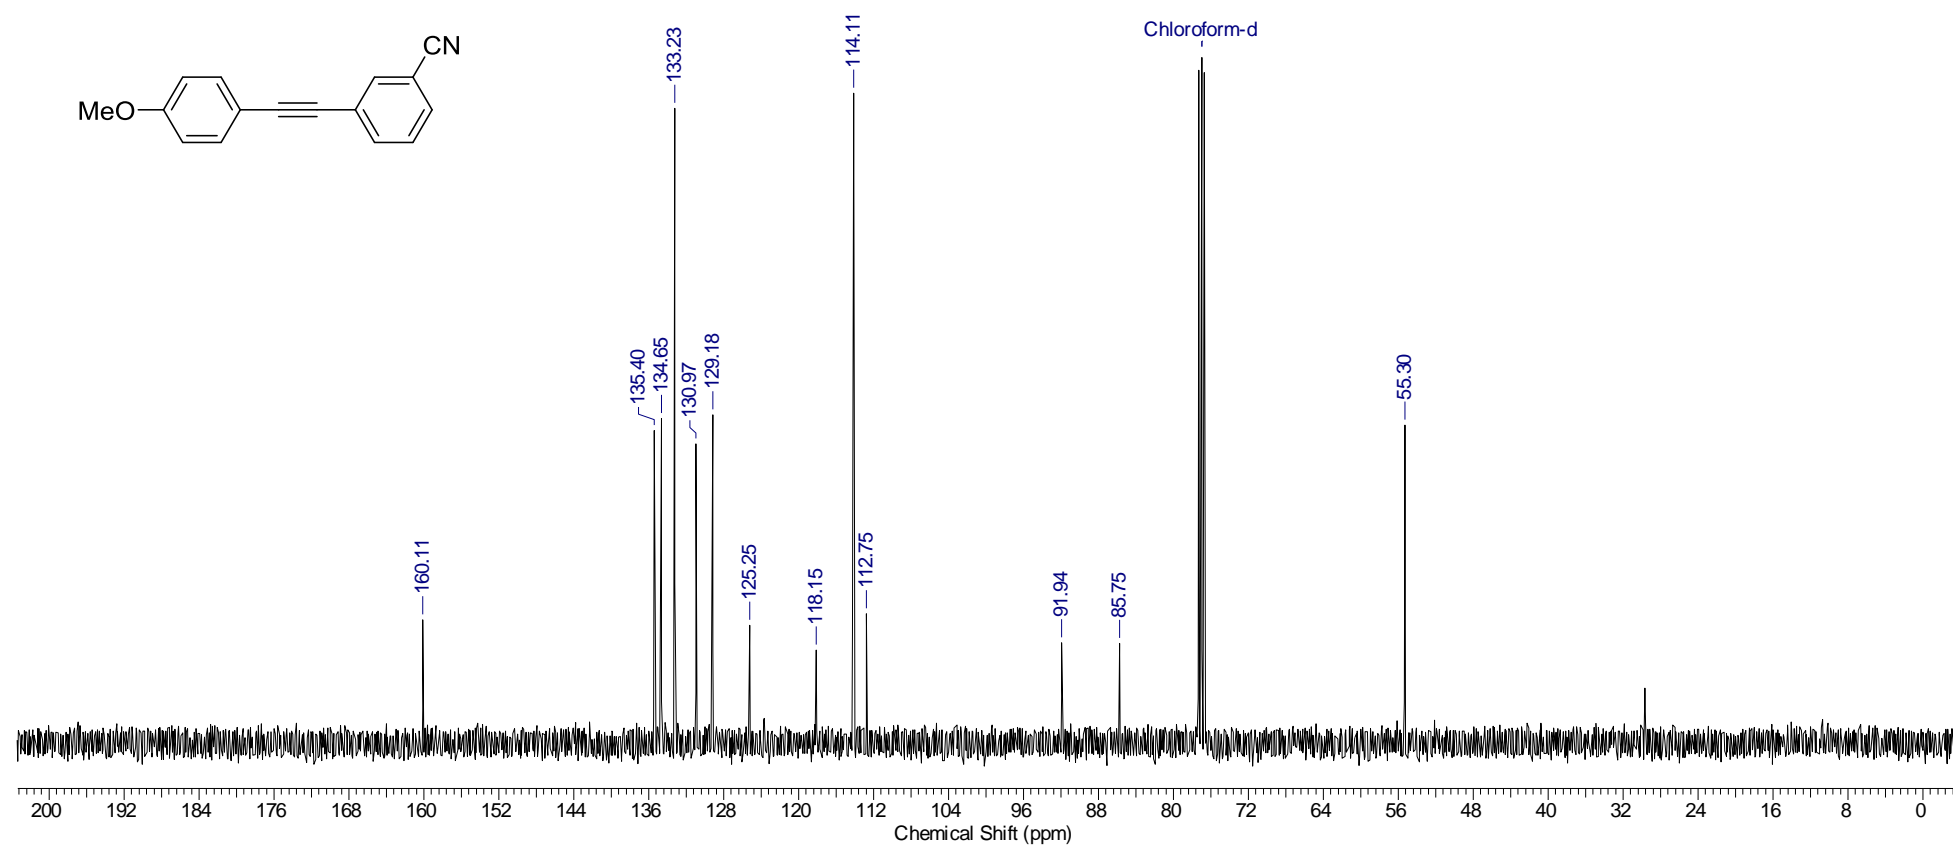

**1-Fluoro-2-[(4-methoxyphenyl)ethynyl]benzene (3f)**

<sup>1</sup>H NMR (400 MHz, CDCl<sub>3</sub>)

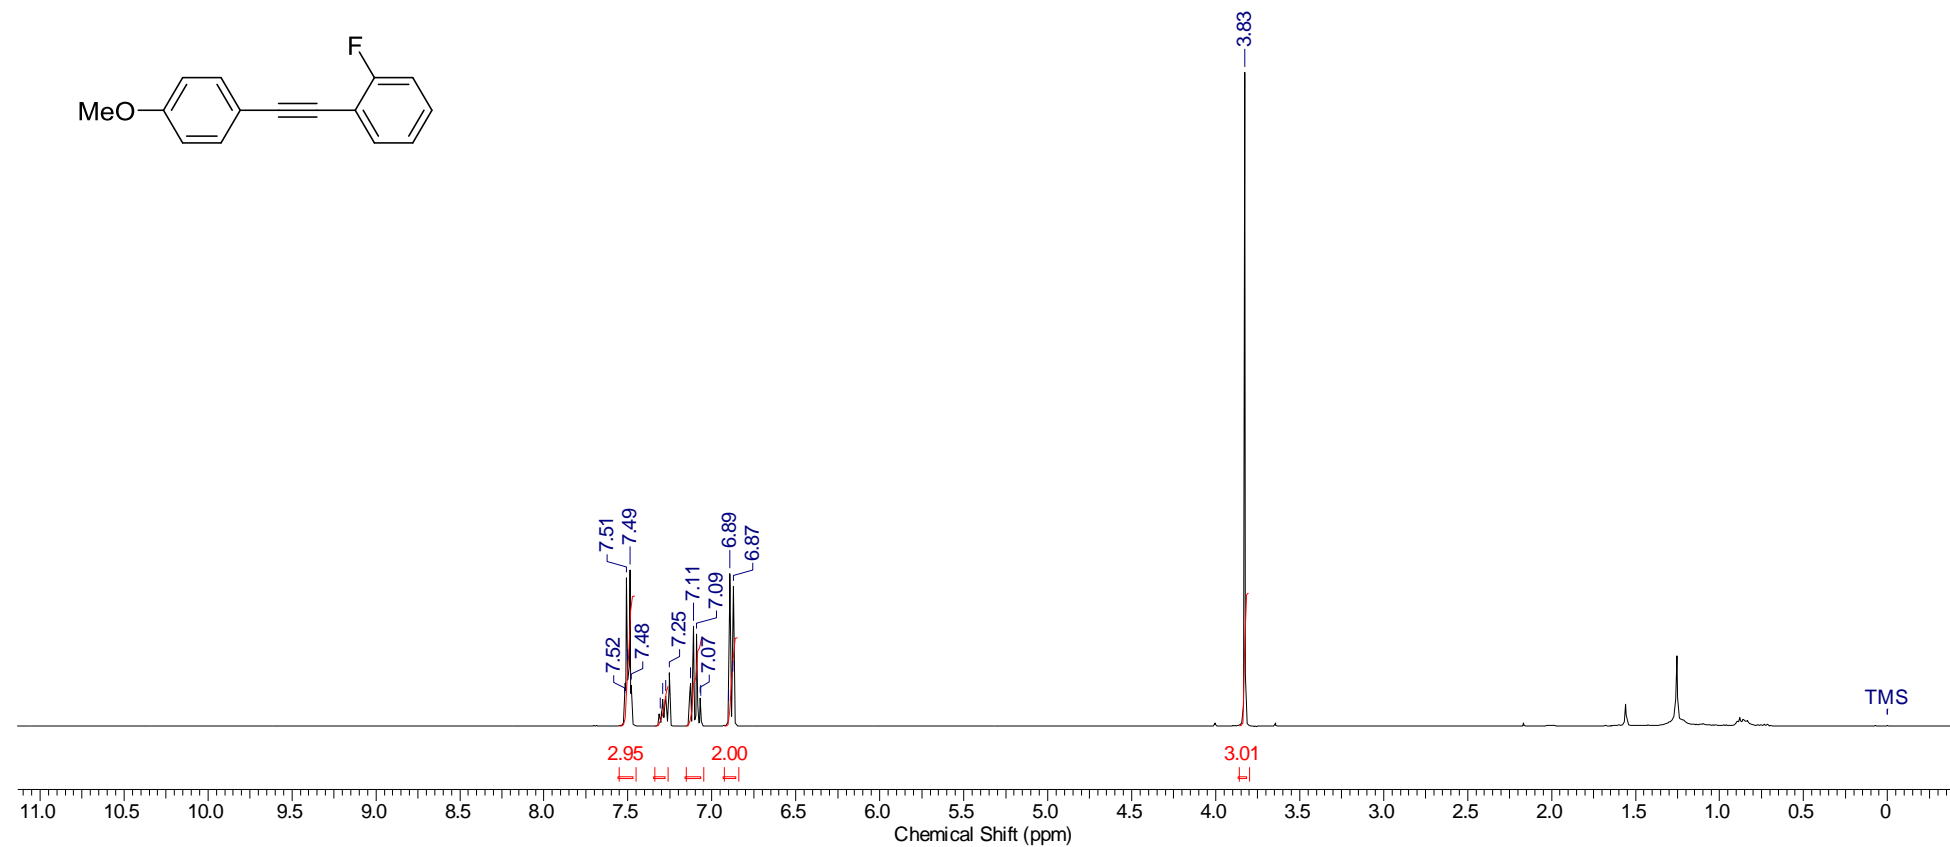

**{3-[(4-Methoxyphenyl)ethynyl]phenyl}methanol (3g)**

<sup>1</sup>H NMR (400 MHz, CDCl<sub>3</sub>)

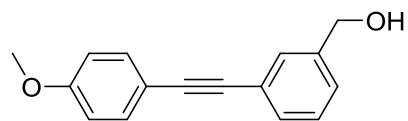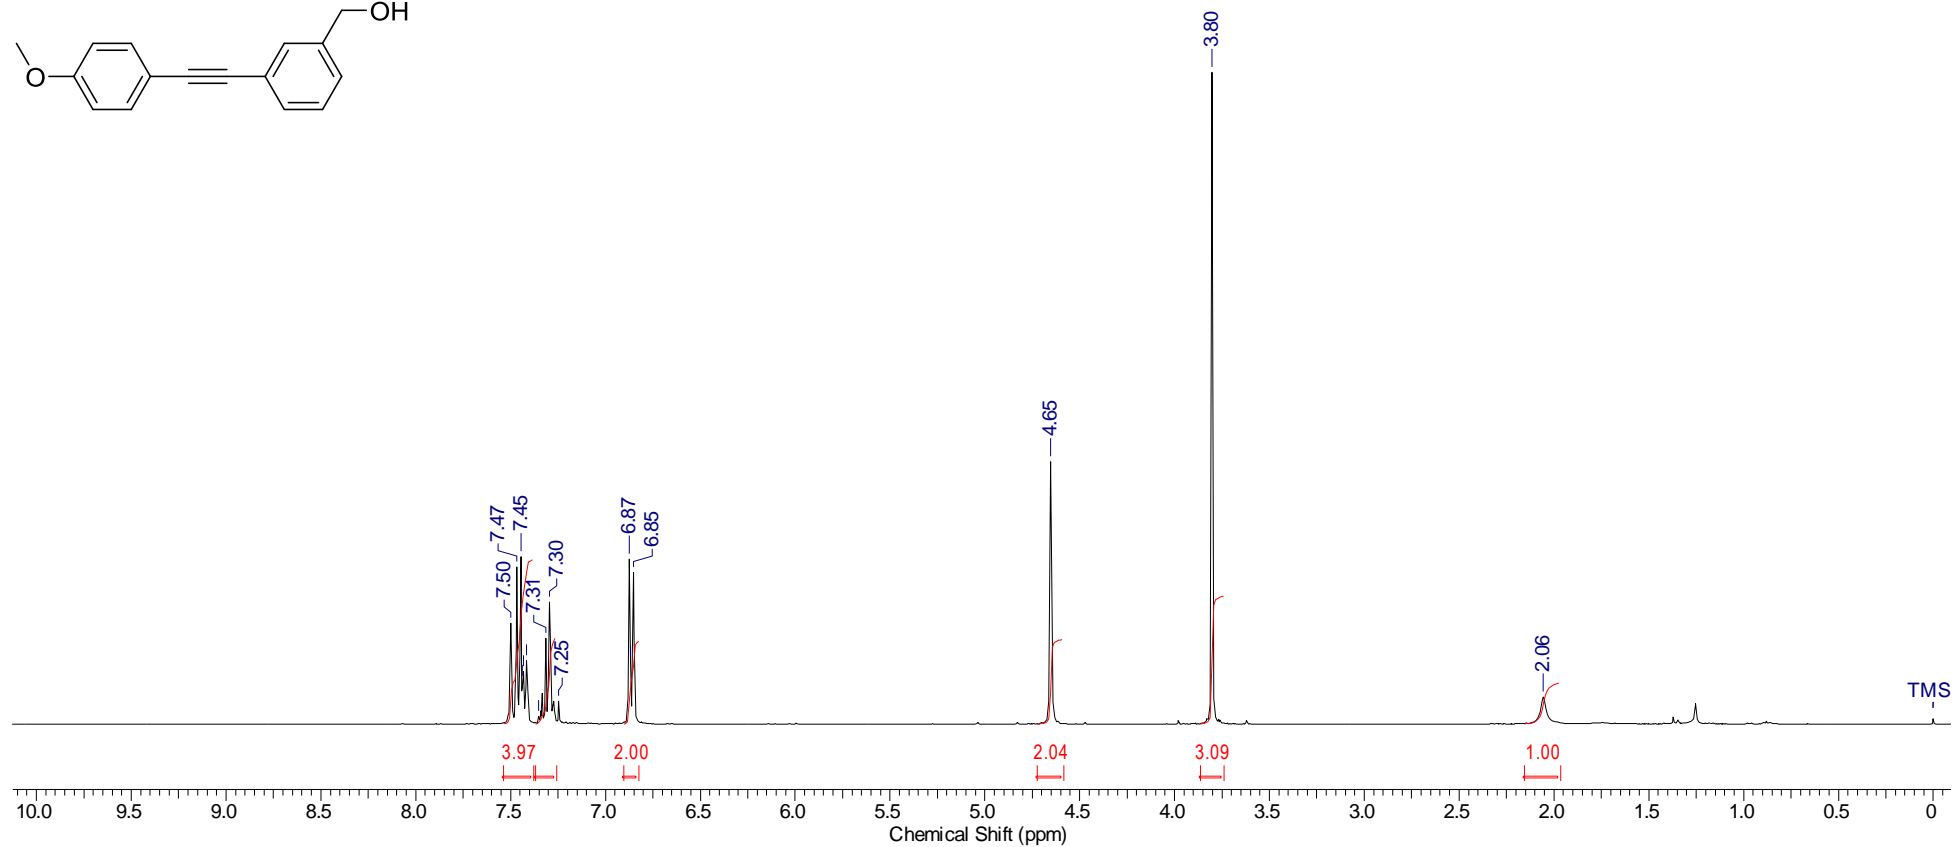

**{3-[(4-Methoxyphenyl)ethynyl]phenyl}methanol (3g)**

<sup>13</sup>C NMR (APT, 100 MHz, CDCl<sub>3</sub>)

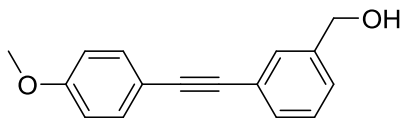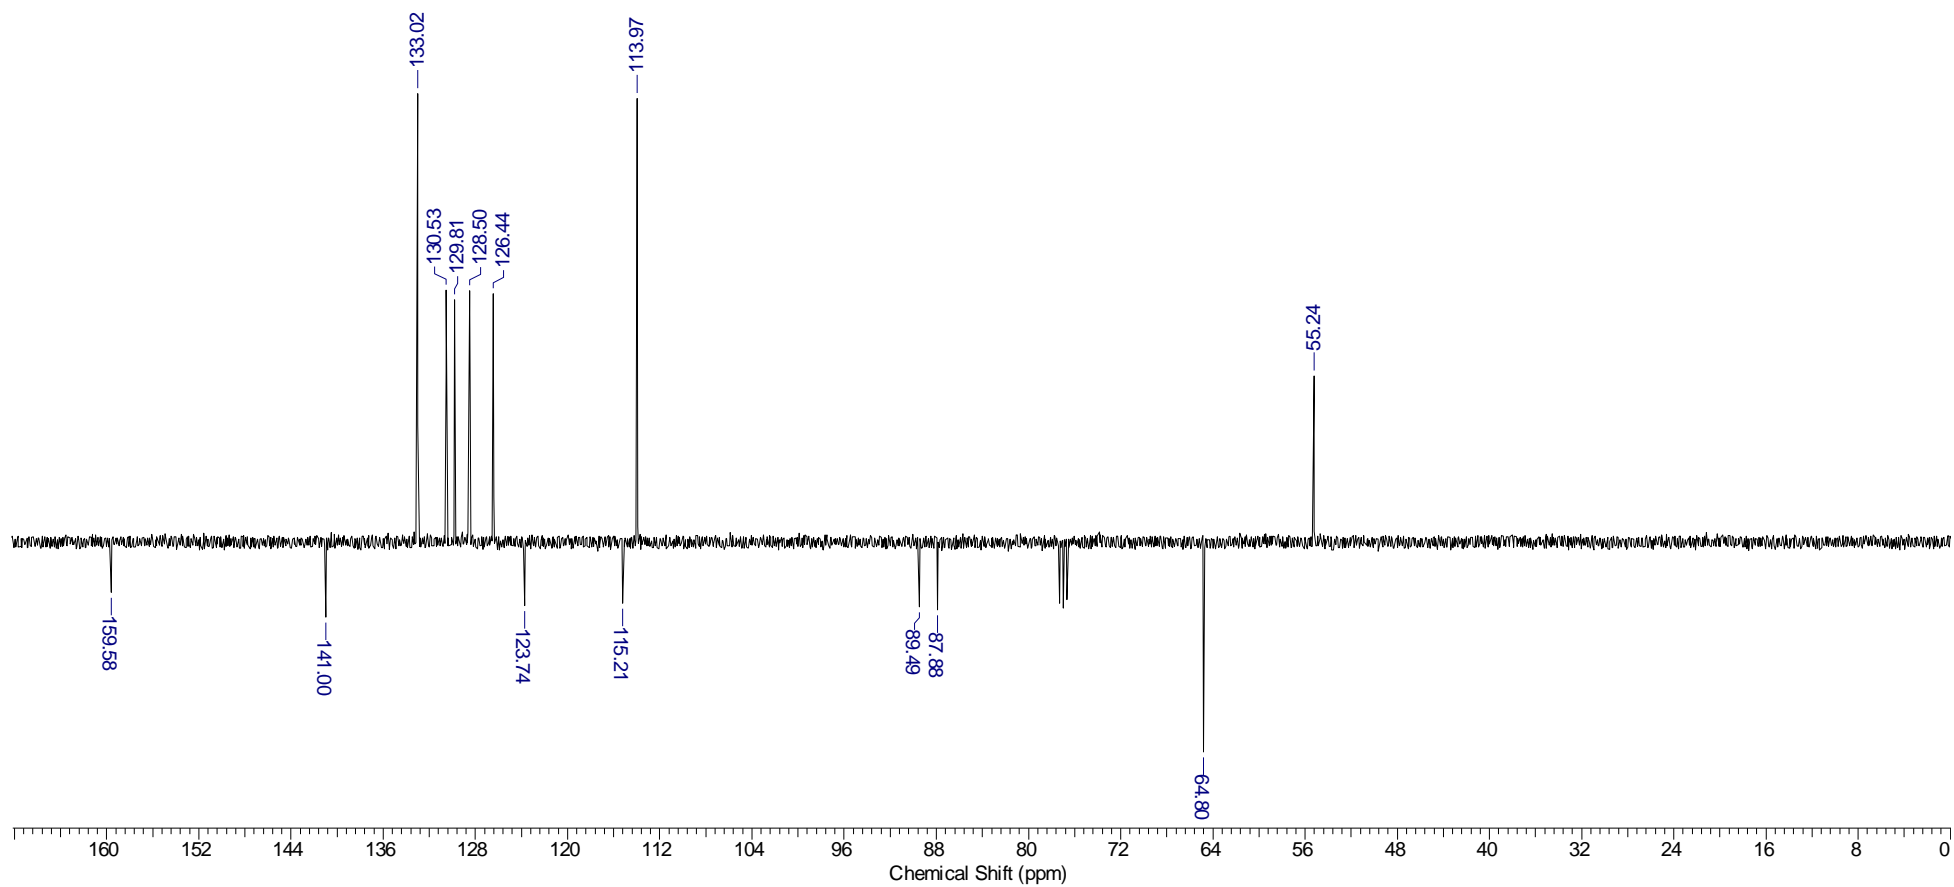

1-[(4-Methoxyphenyl)ethynyl]-3,5-dimethylbenzene (3h)

$^1\text{H}$  NMR (400 MHz,  $\text{CDCl}_3$ )

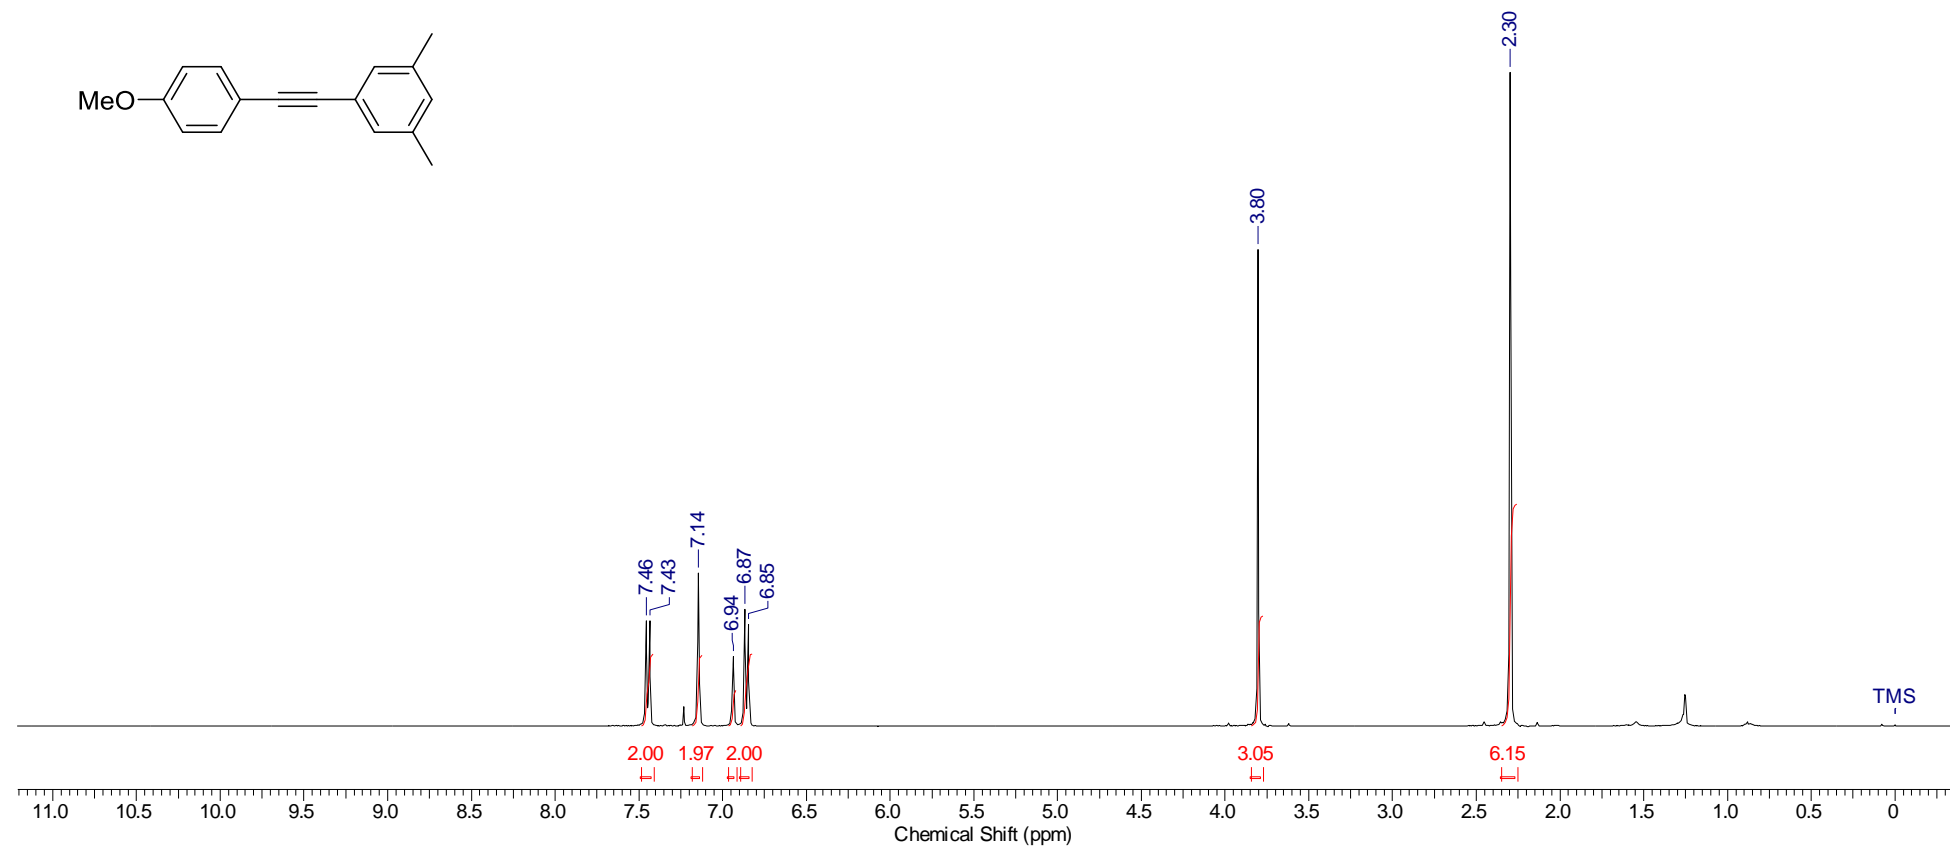

### 2-[(4-Methoxyphenyl)ethynyl]thiophene (3i)

$^1\text{H}$  NMR (600 MHz,  $\text{CDCl}_3$ )

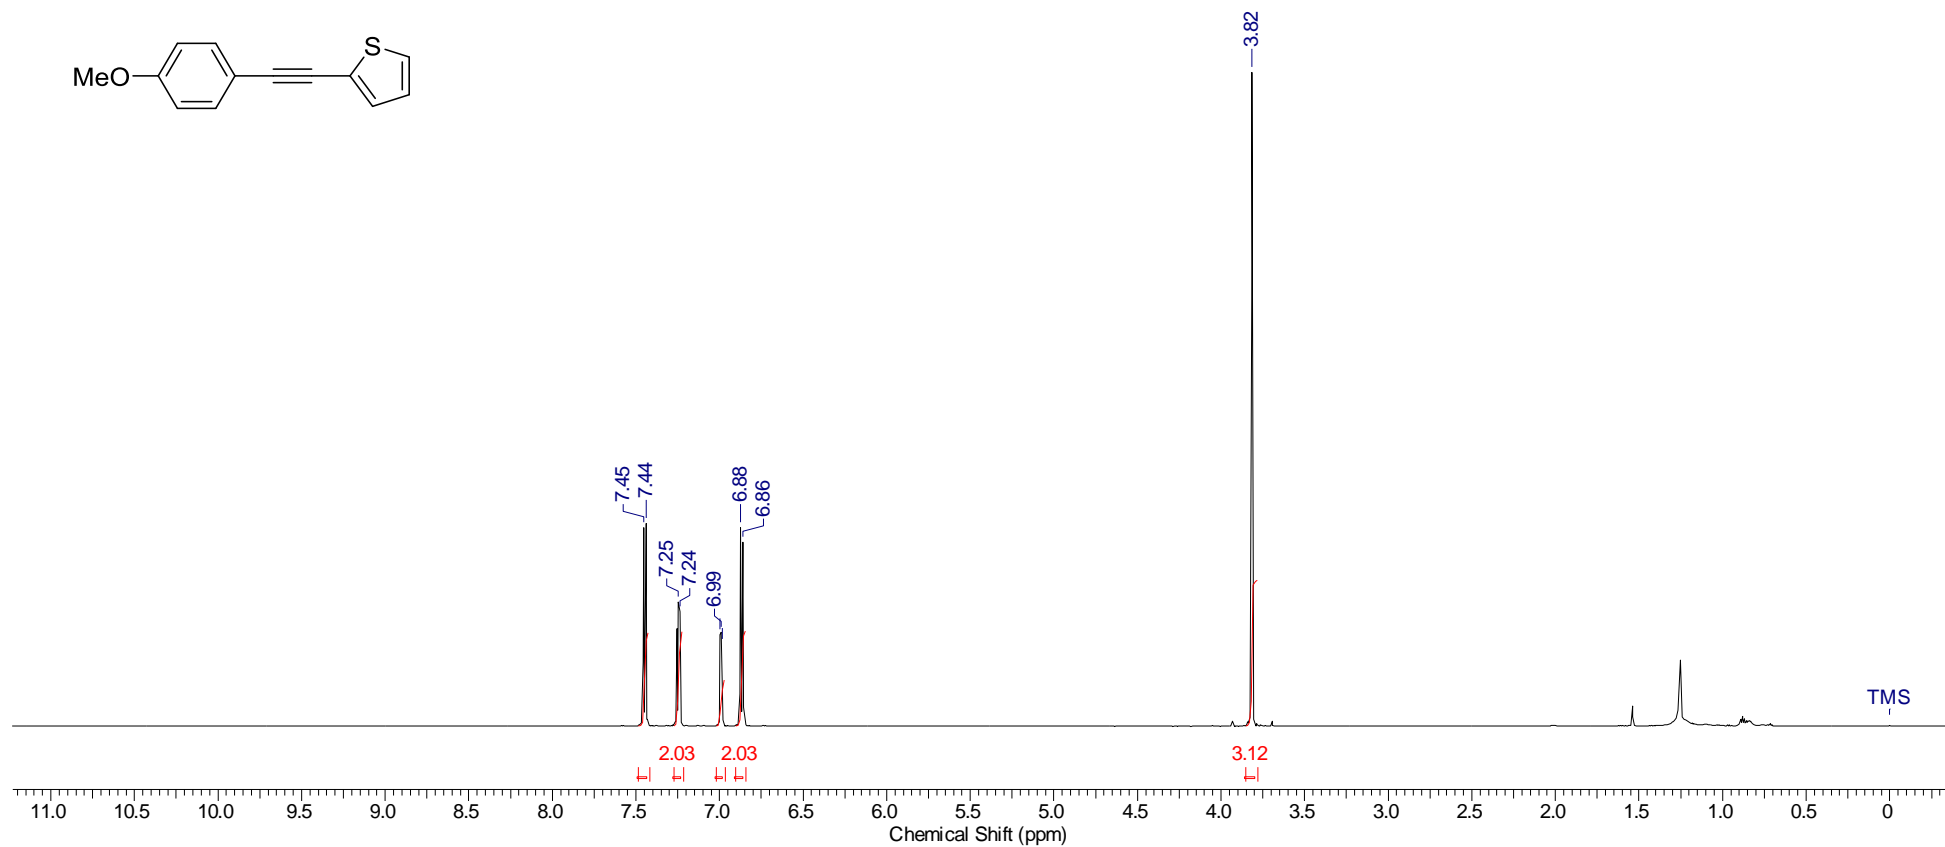



### 3-[(4-Methoxyphenyl)ethynyl]pyridine (3j)

<sup>1</sup>H NMR (400 MHz, CDCl<sub>3</sub>)

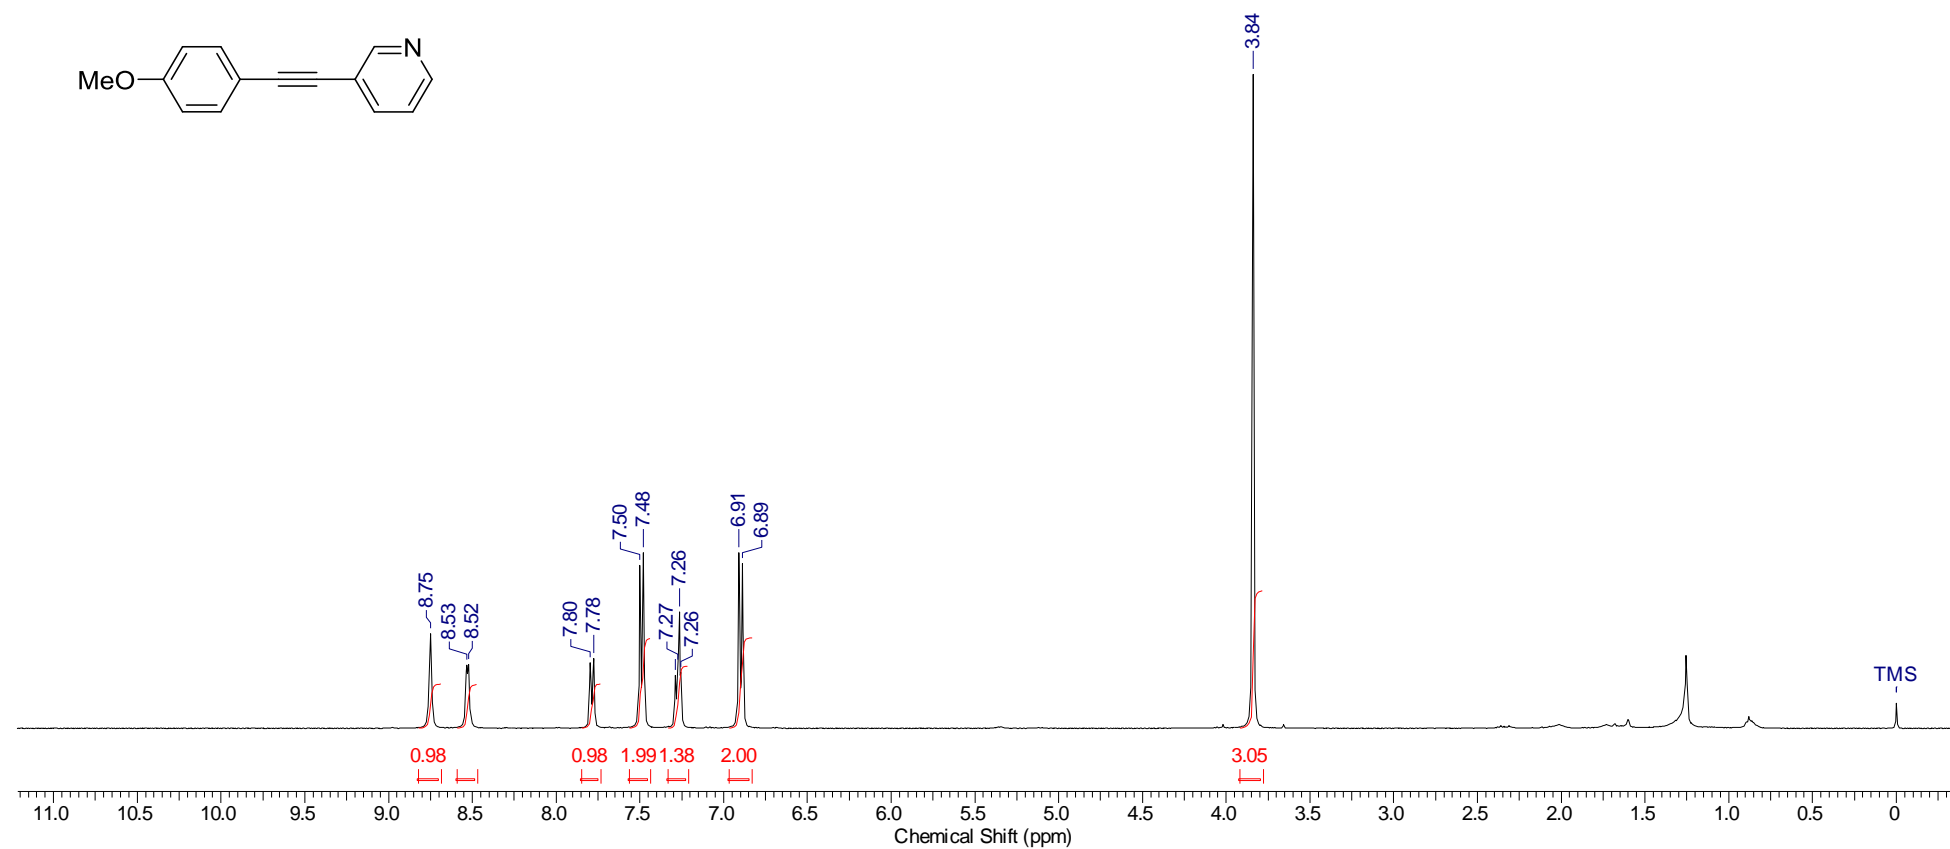

### 4-Chloro-6-[(4-methoxyphenyl)ethynyl]quinoline (3k)

$^1\text{H}$  NMR (400 MHz,  $\text{CDCl}_3$ )

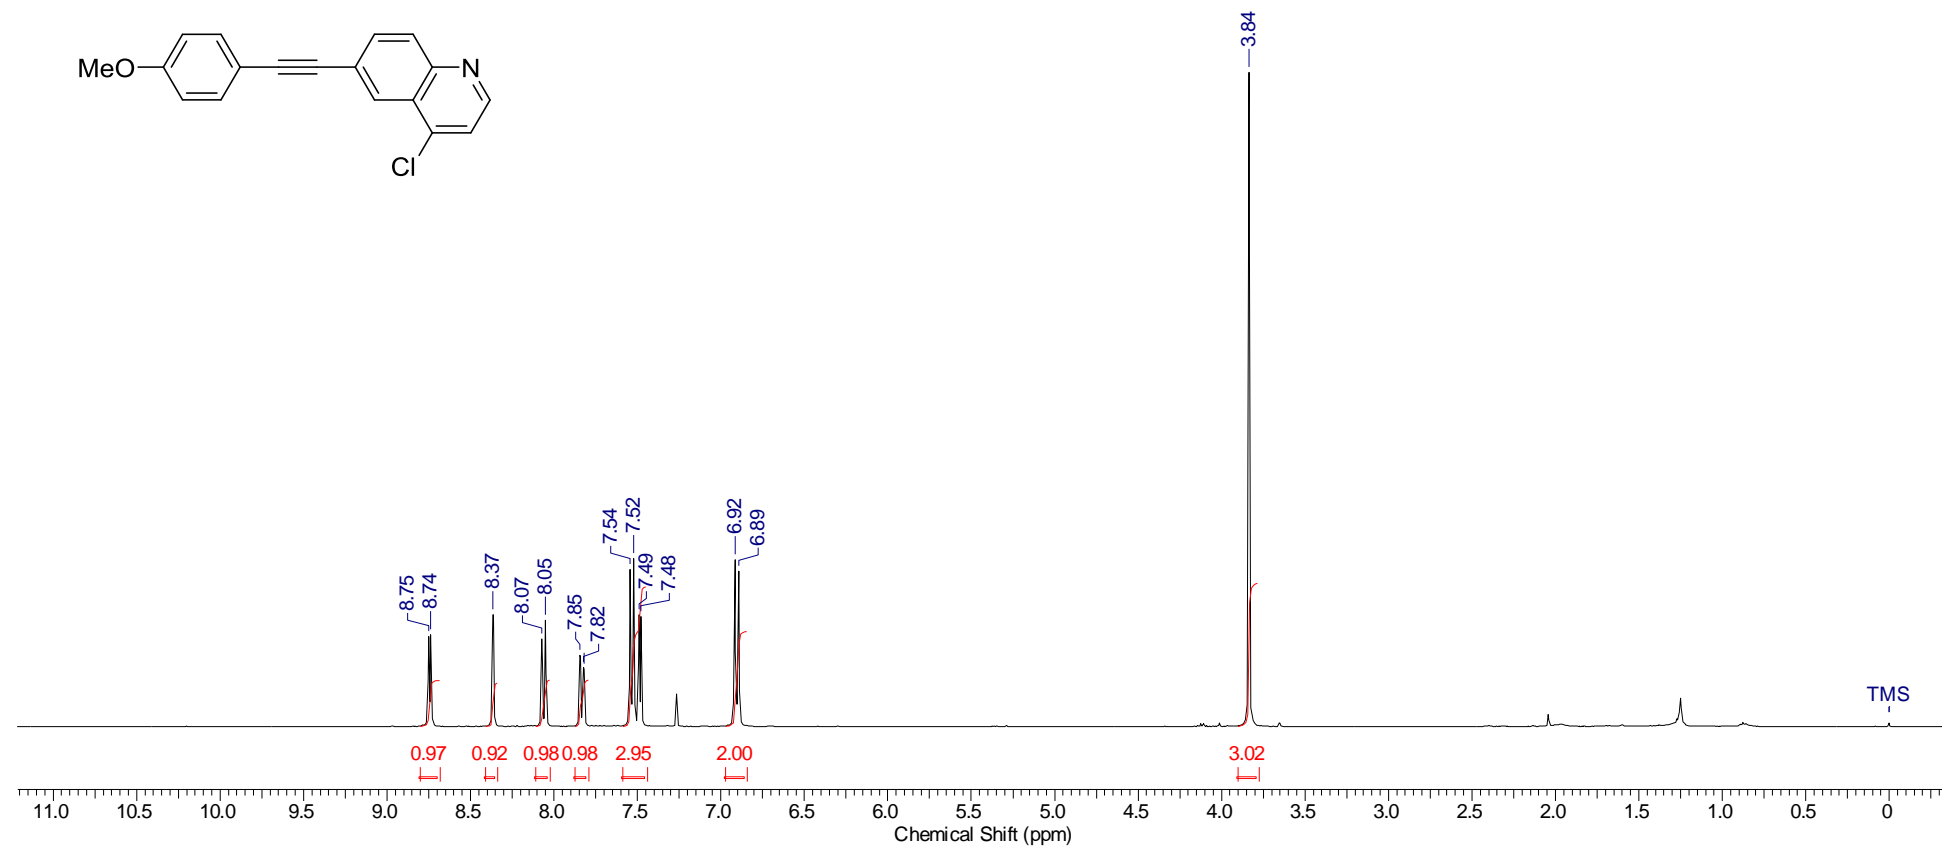

### 4-Chloro-6-[(4-methoxyphenyl)ethynyl]quinoline (3k)

$^{13}\text{C}$  NMR (100 MHz,  $\text{CDCl}_3$ )

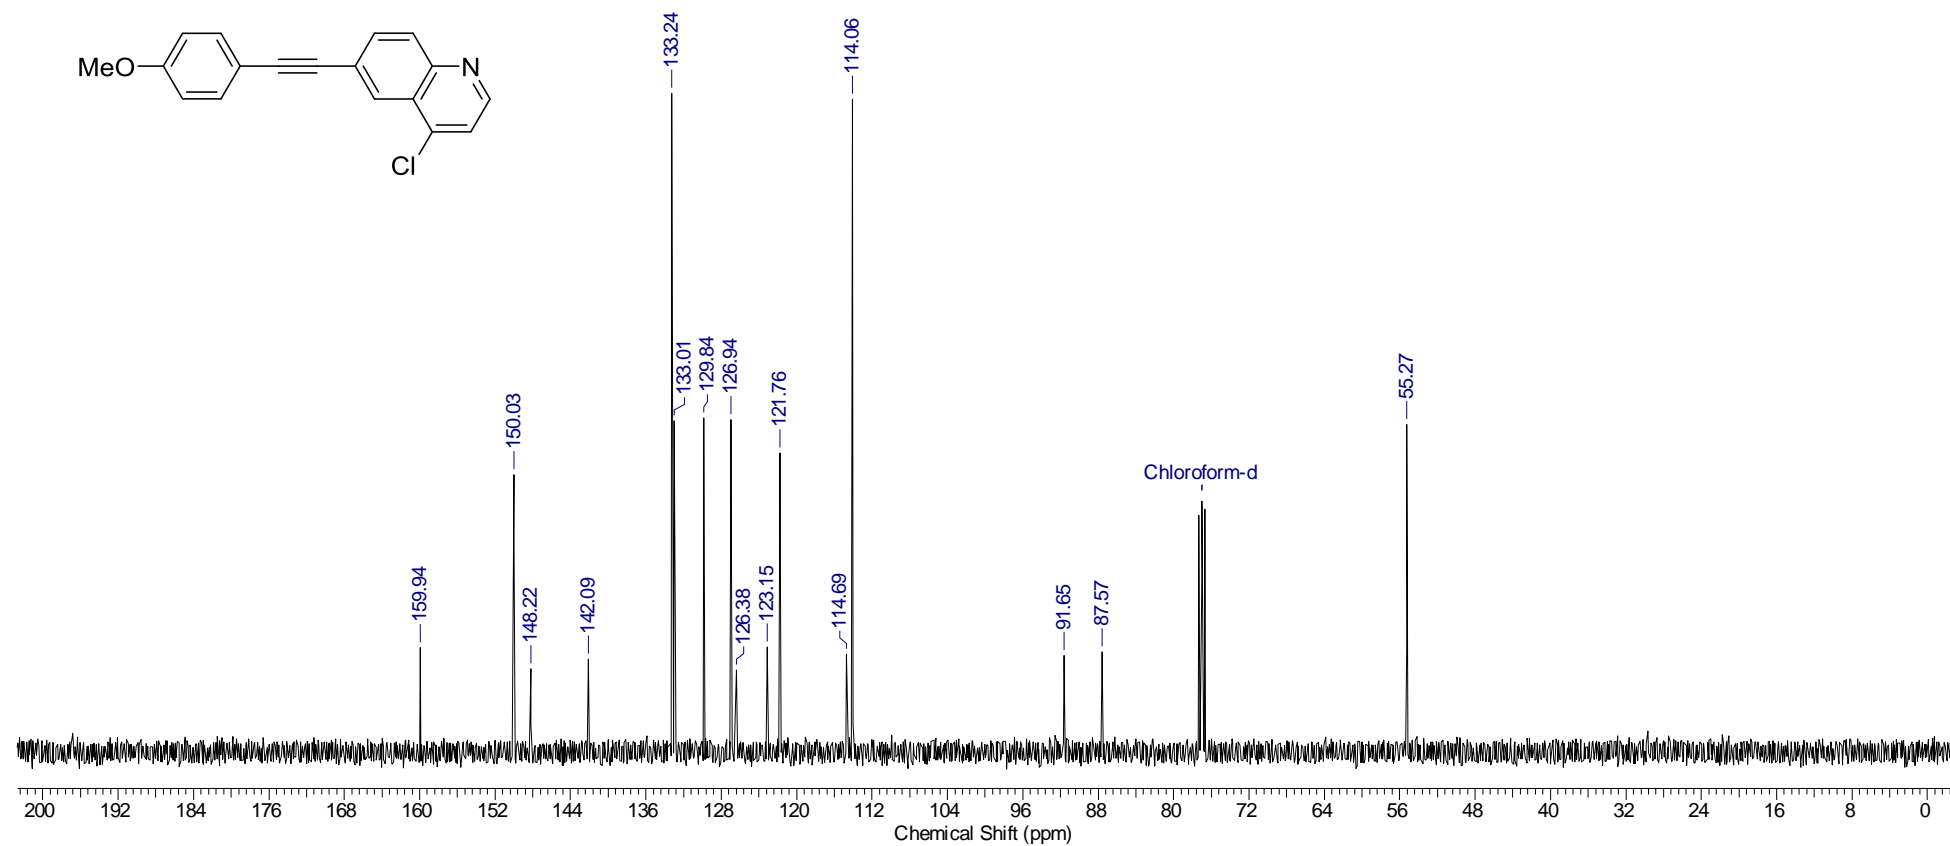

4-[(4-Methoxyphenyl)ethynyl]benzonitrile (3I)

<sup>1</sup>H NMR (400 MHz, CDCl<sub>3</sub>)

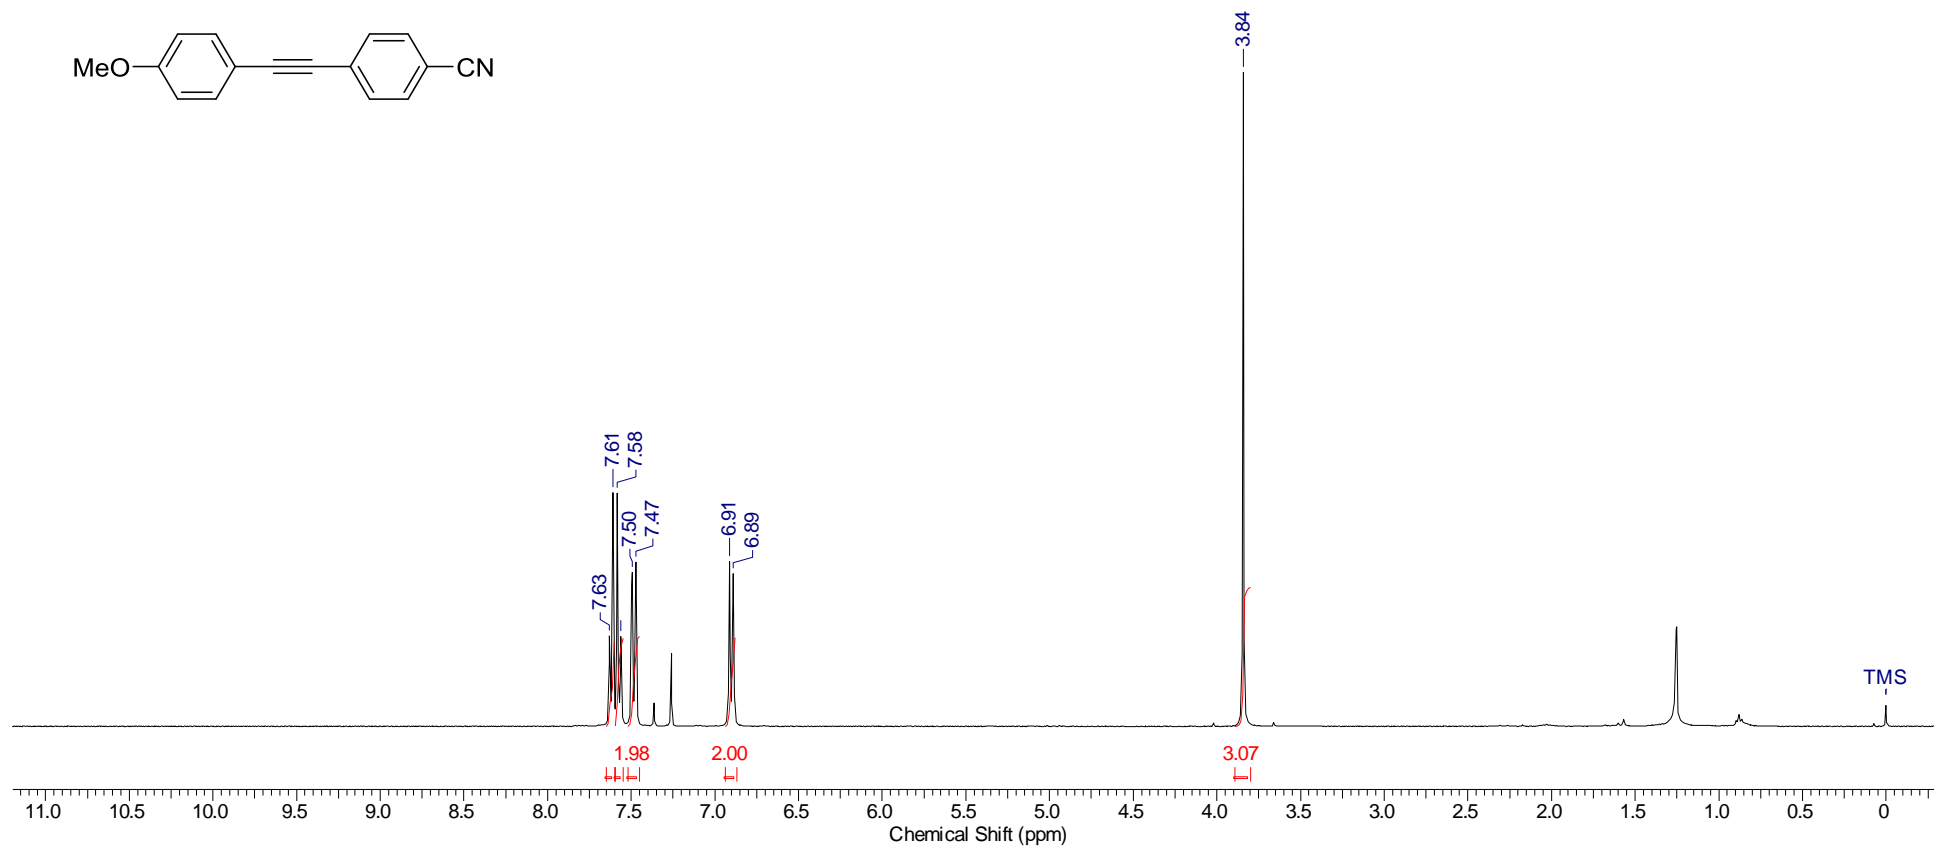

2-[(4-Methoxyphenyl)ethynyl]benzonitrile (3m)

$^1\text{H}$  NMR (400 MHz,  $\text{CDCl}_3$ )

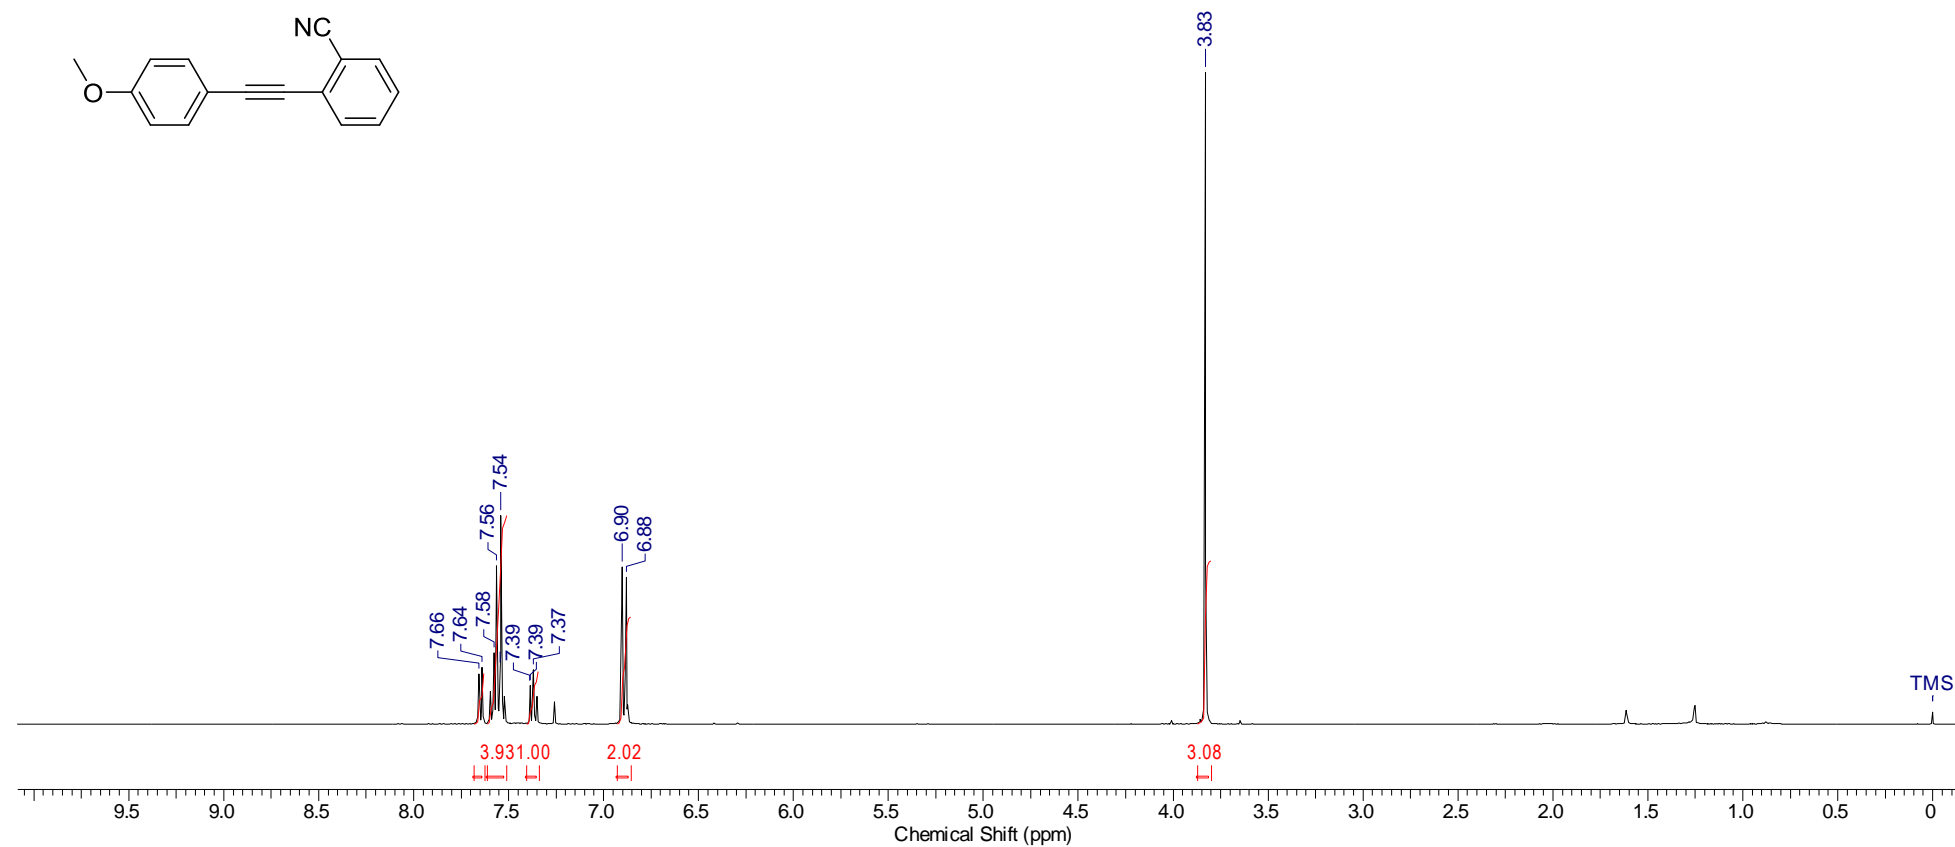

**1-[(4-Methoxyphenyl)ethynyl]-3,5-bis(trifluoromethyl)benzene (3n)**

<sup>1</sup>H NMR (400 MHz, CDCl<sub>3</sub>)

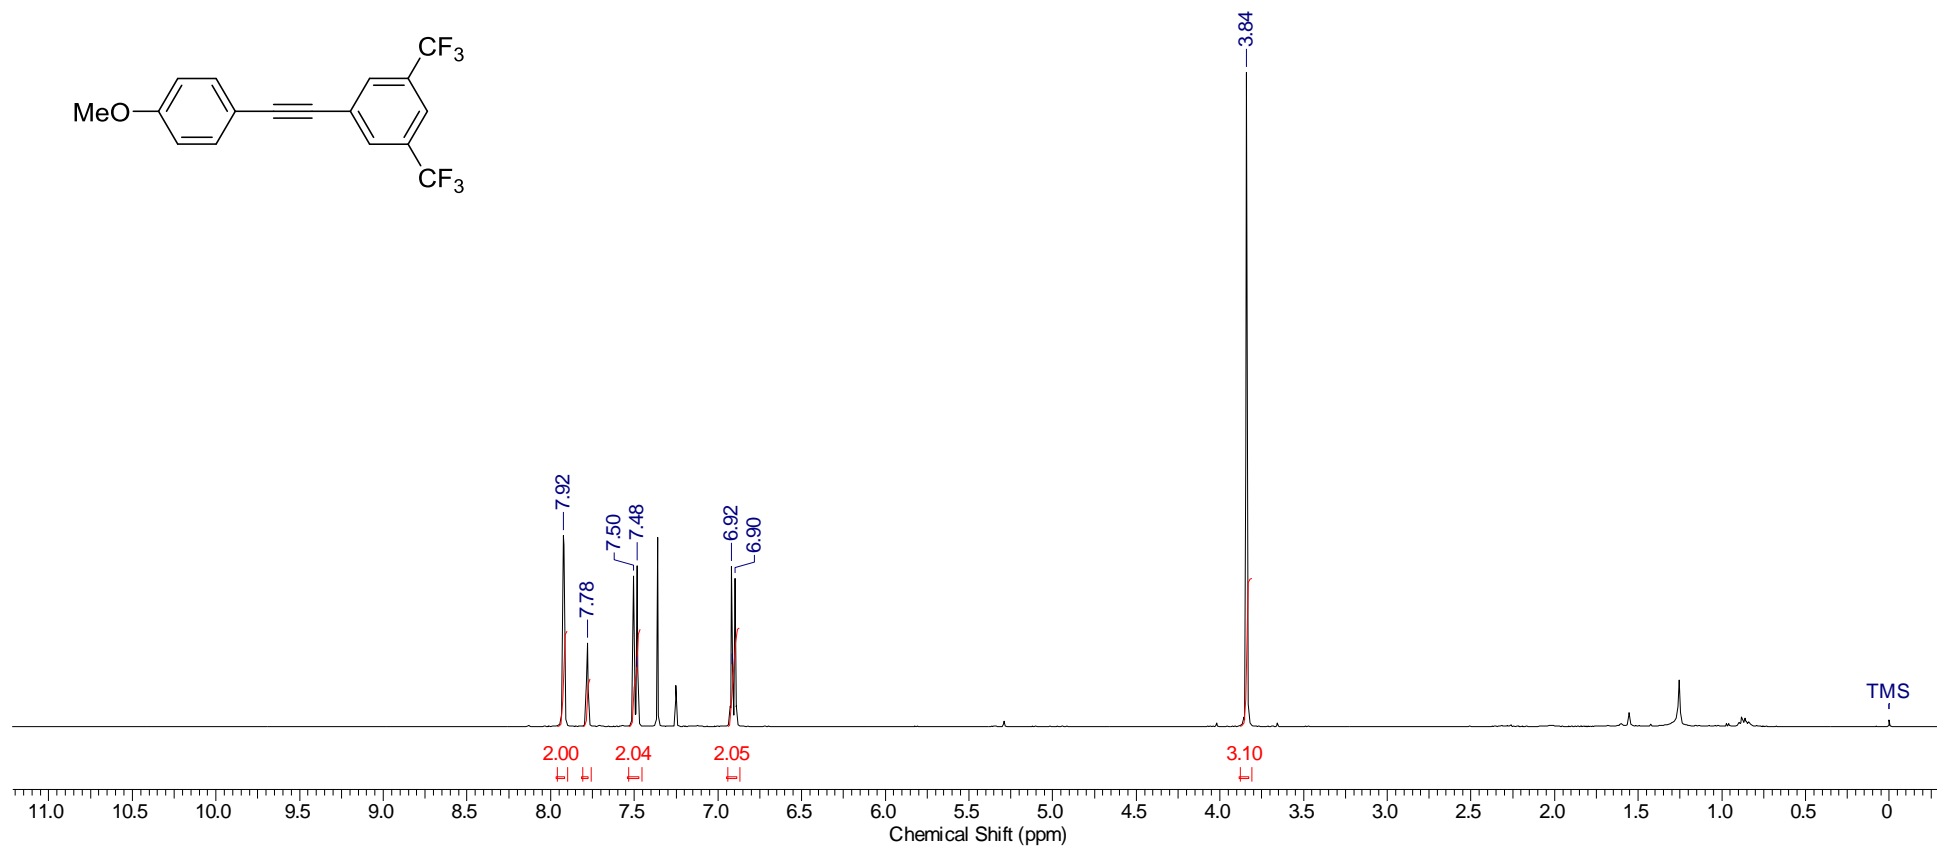

1-{4-[(4-Methoxyphenyl)ethynyl]phenyl}ethanone (3o)

<sup>1</sup>H NMR (400 MHz, CDCl<sub>3</sub>)

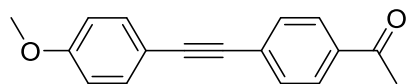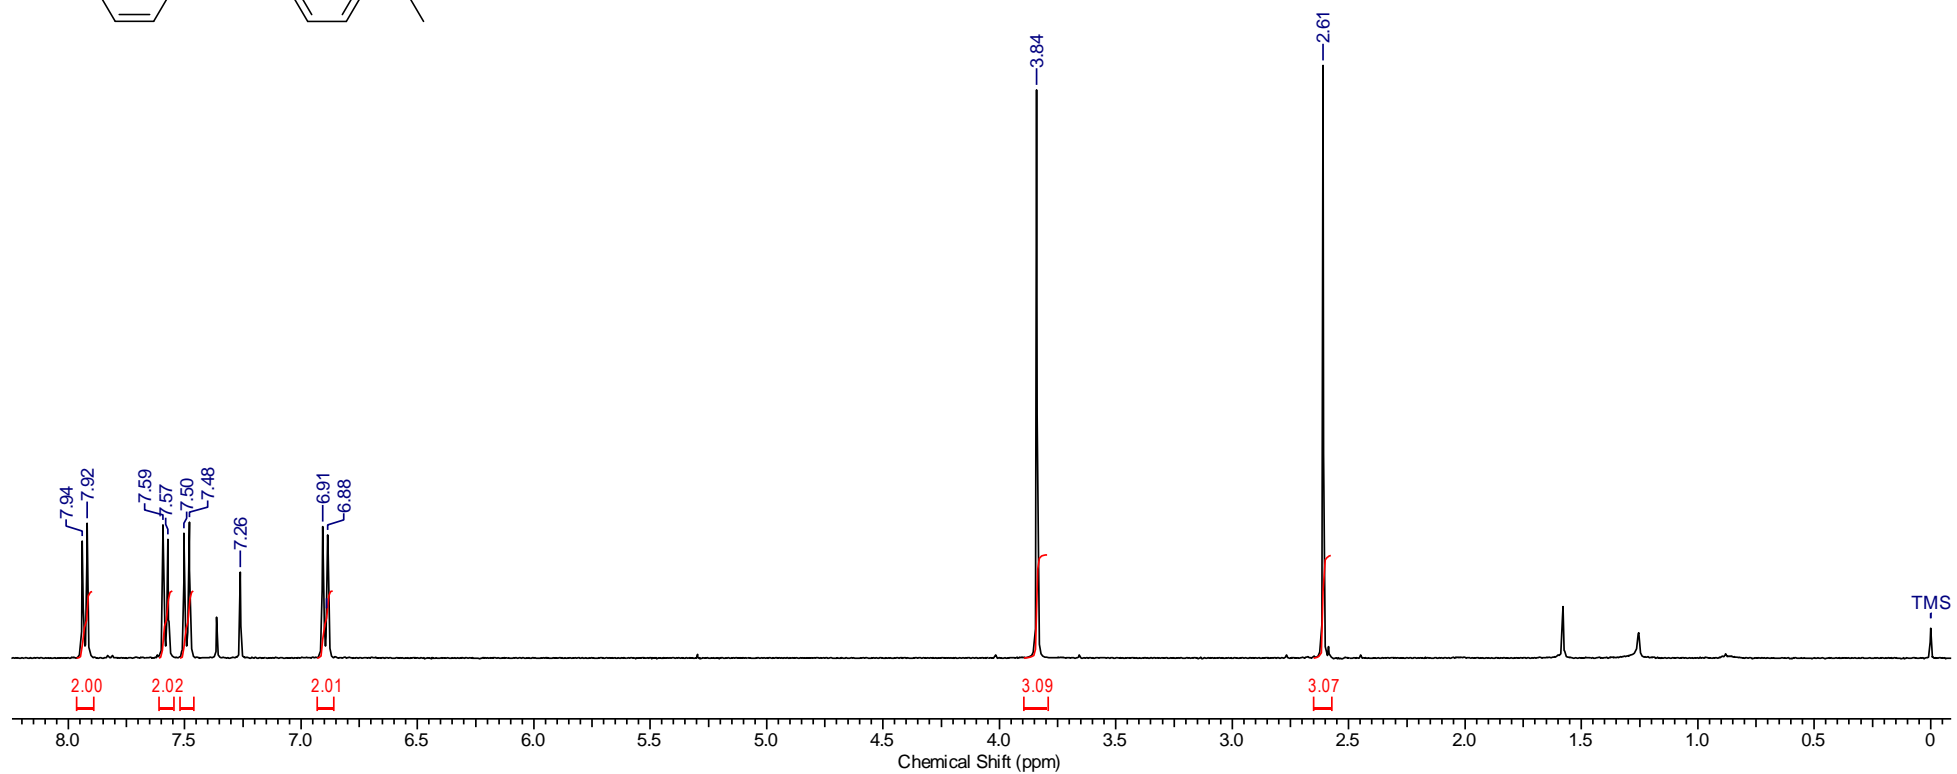

### 3-[(4-Methoxyphenyl)ethynyl]quinoline (3p)

$^1\text{H}$  NMR (400 MHz,  $\text{CDCl}_3$ )

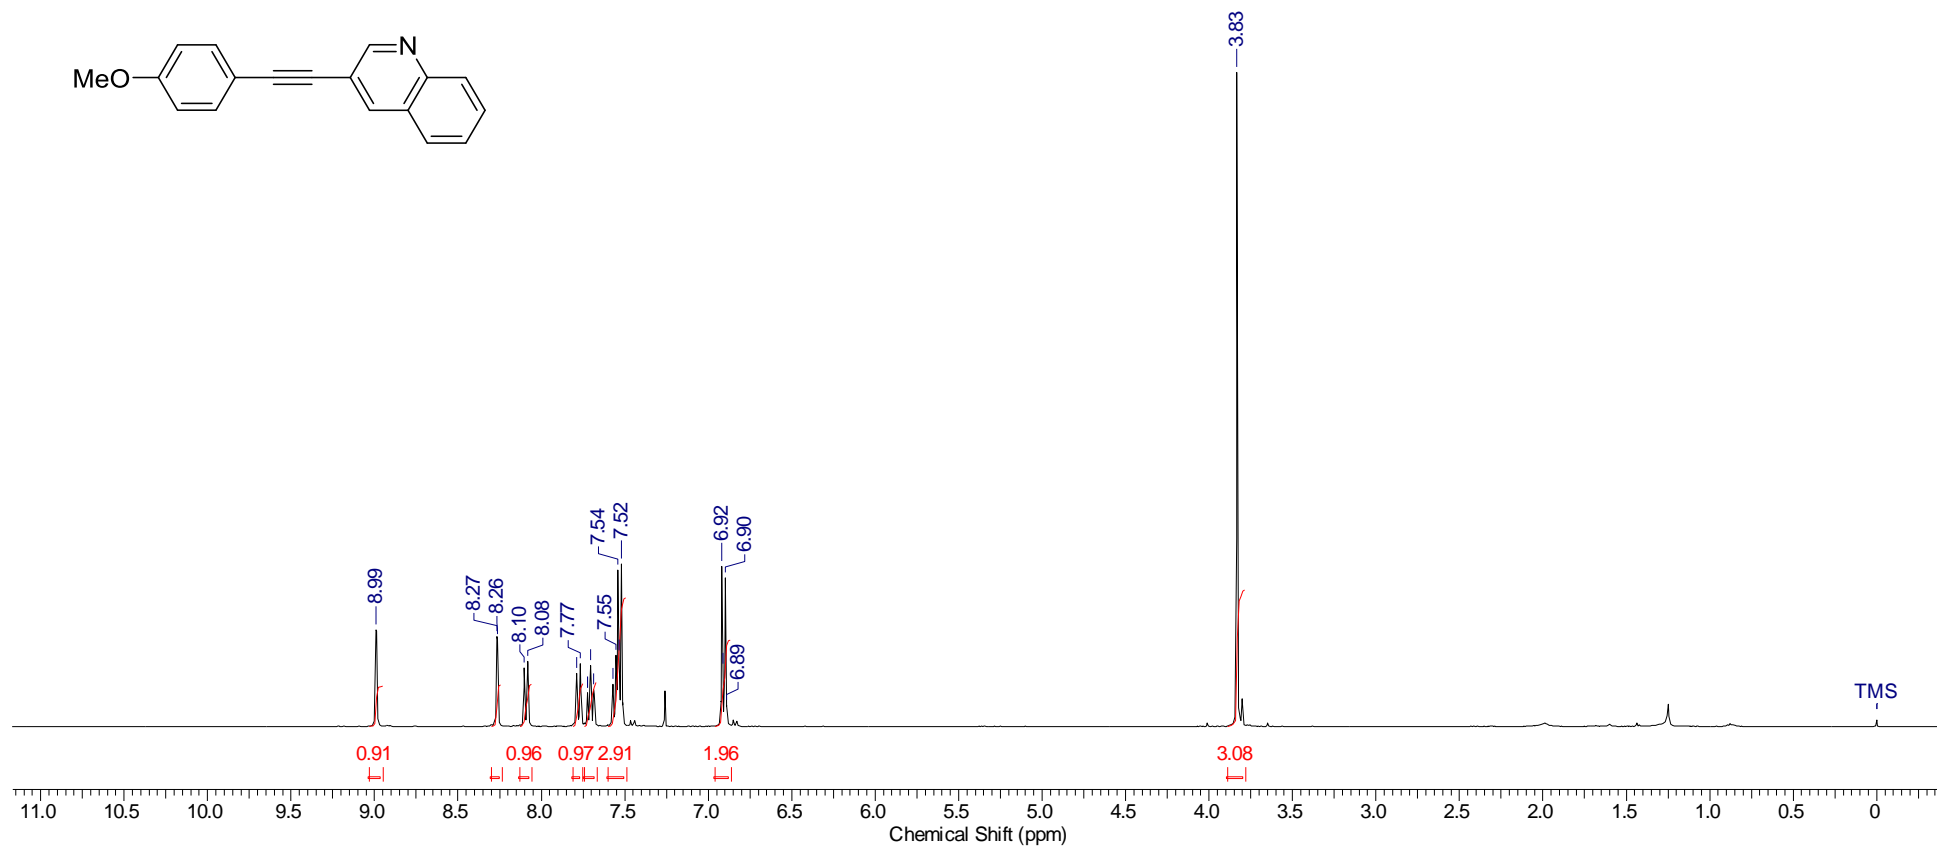



2-[(4-Methoxyphenyl)ethynyl]pyridine (3q)

<sup>1</sup>H NMR (400 MHz, CDCl<sub>3</sub>)

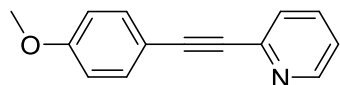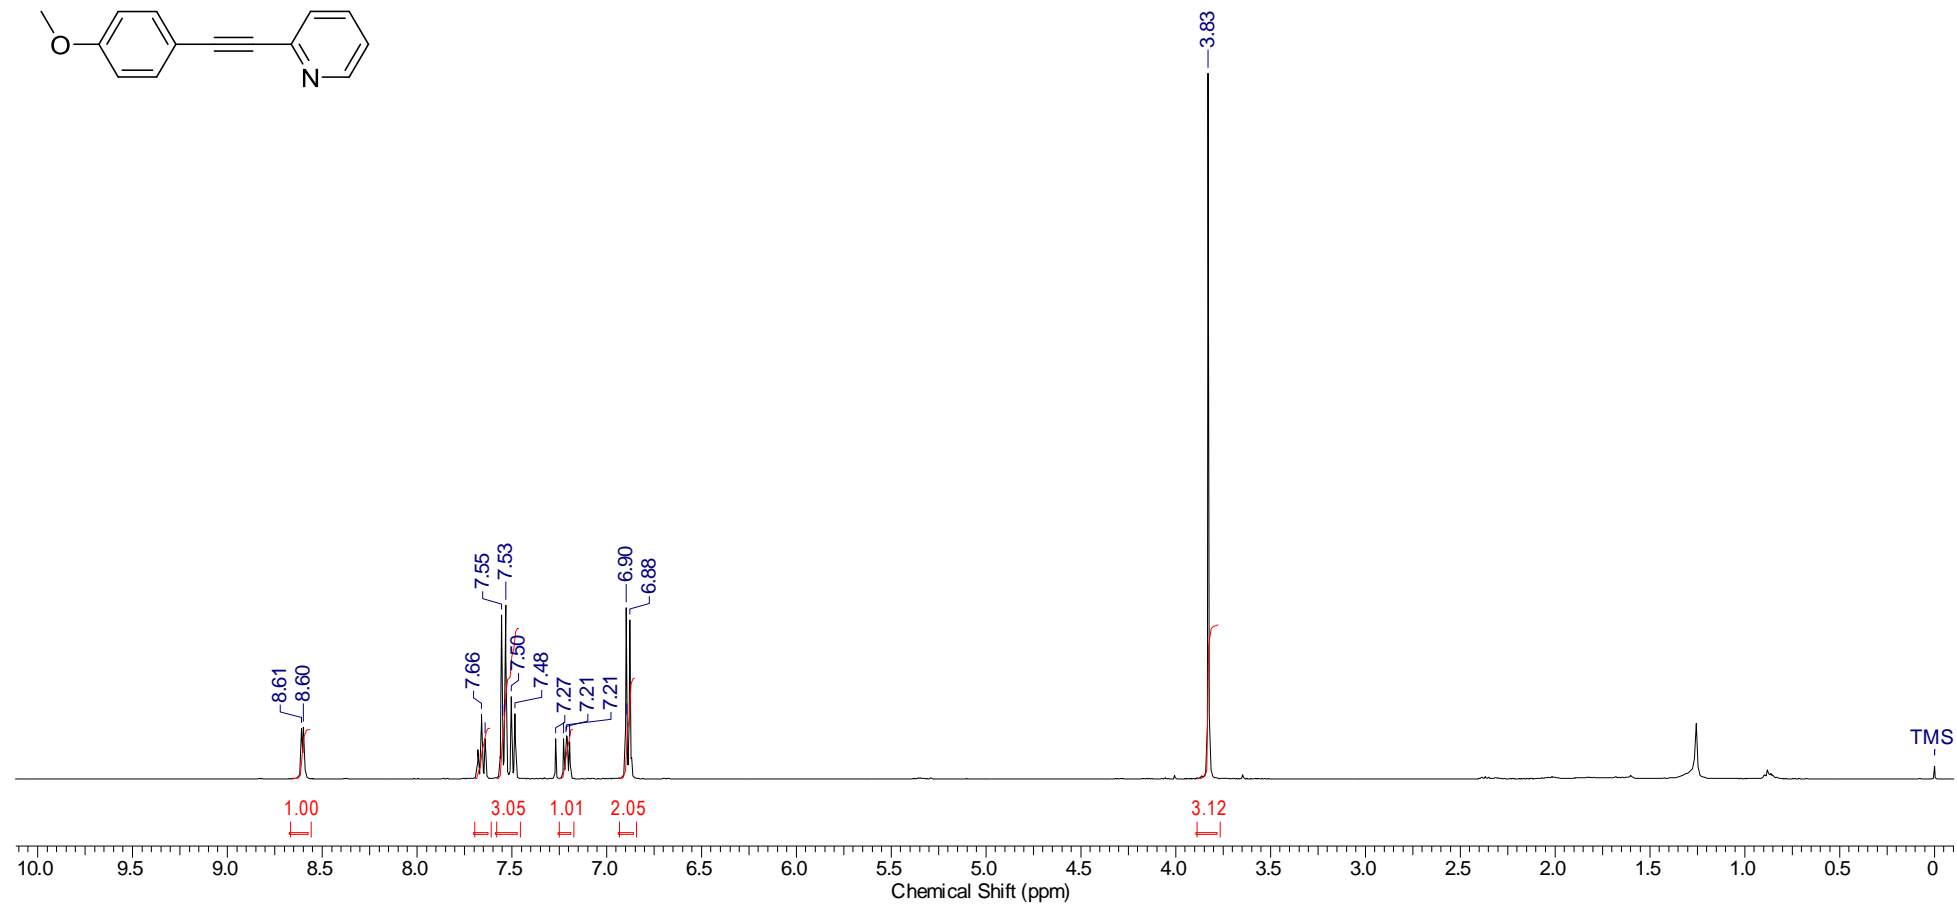

2-[(4-Methoxyphenyl)ethynyl]pyrimidine (3r)

$^1\text{H}$  NMR (400 MHz,  $\text{CDCl}_3$ )

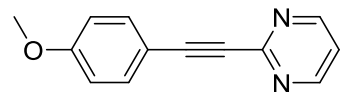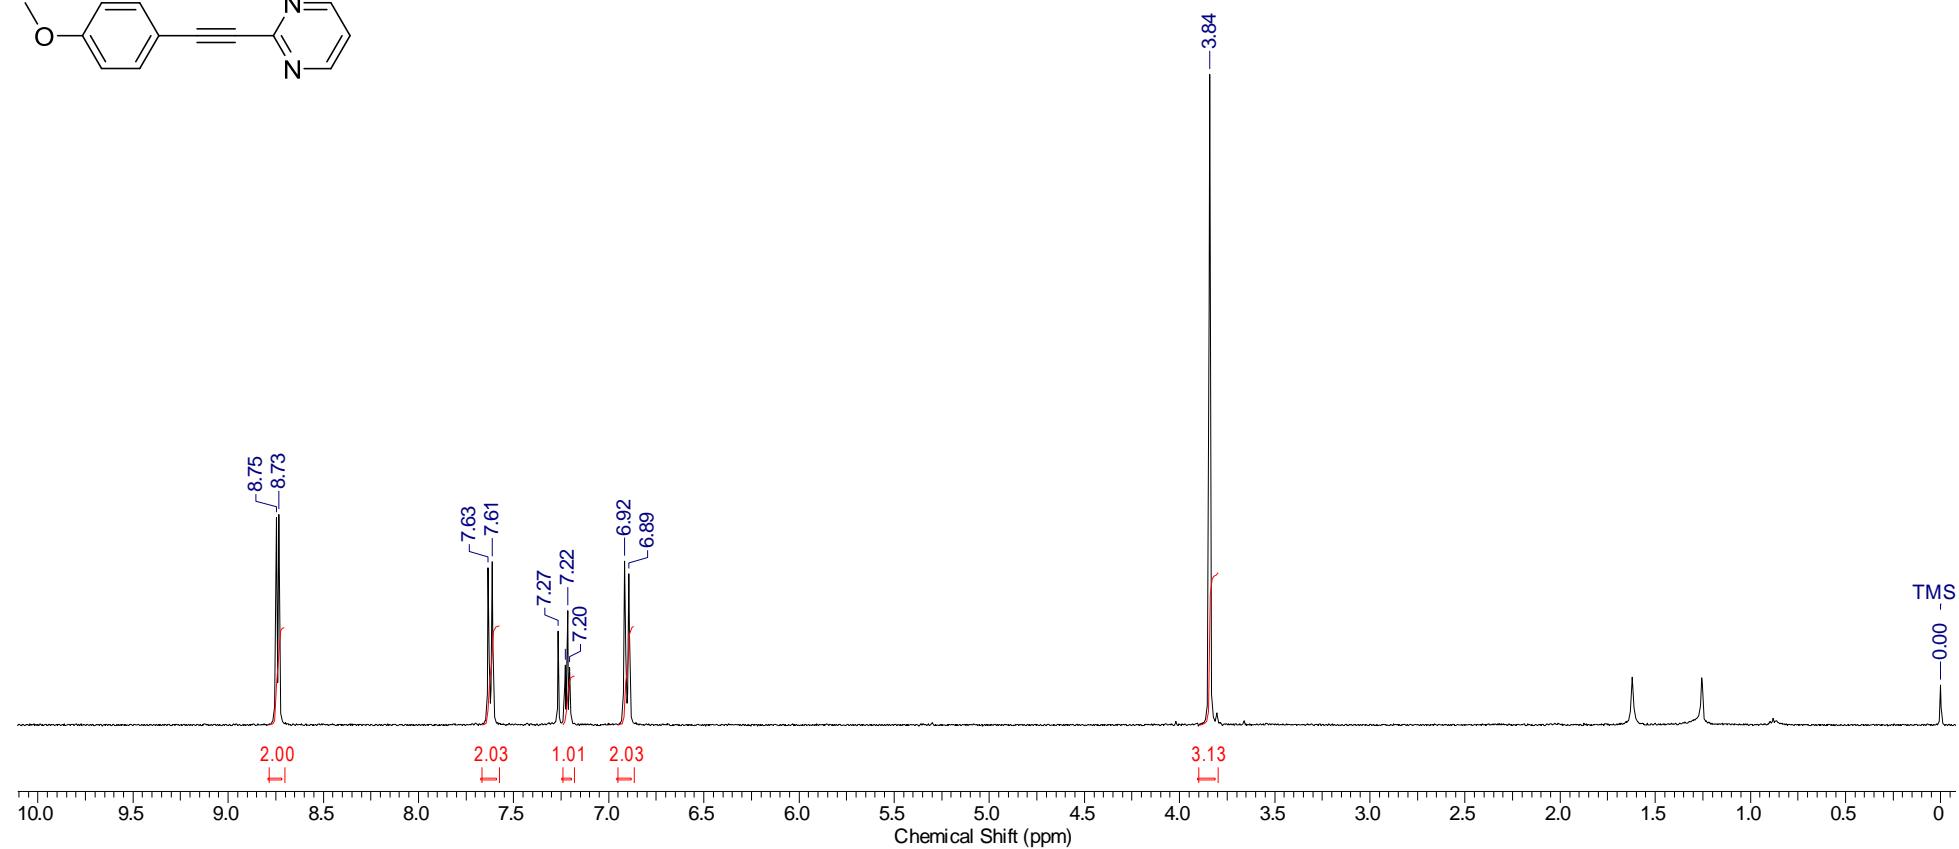

5-[(4-Methoxyphenyl)ethynyl]pyrimidine (3s)

$^1\text{H}$  NMR (400 MHz,  $\text{CDCl}_3$ )

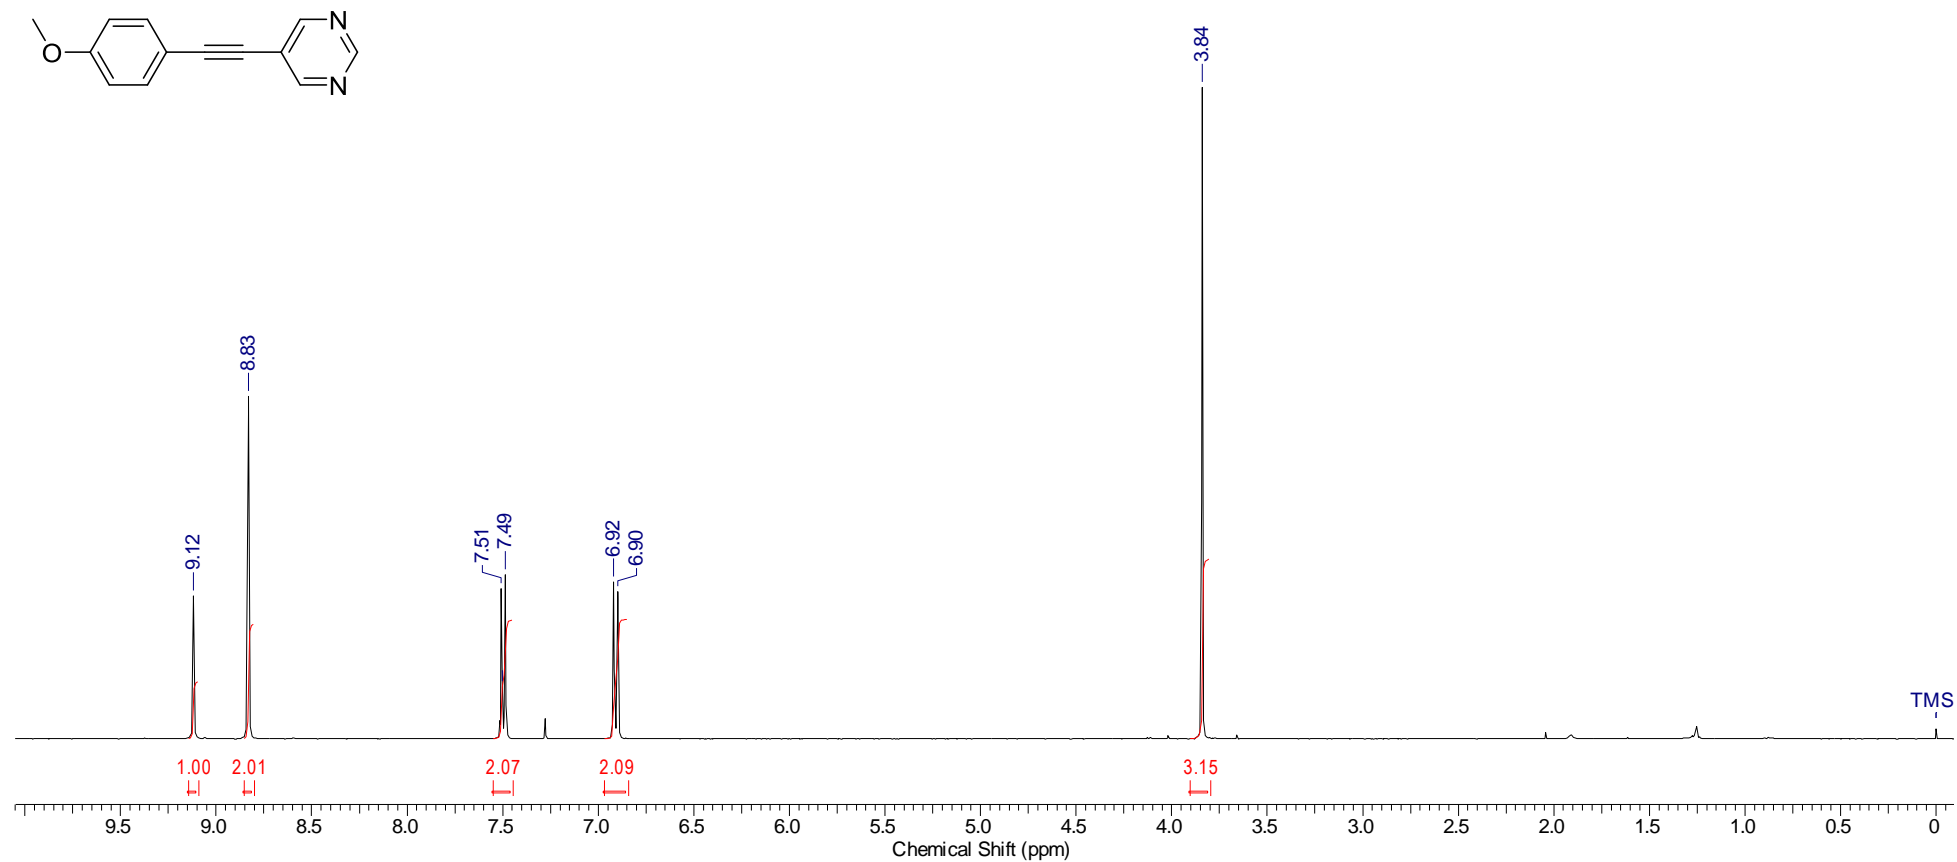

### 5-[(4-Methoxyphenyl)ethynyl]pyrimidine (3s)

$^{13}\text{C}$  NMR (100 MHz,  $\text{CDCl}_3$ )

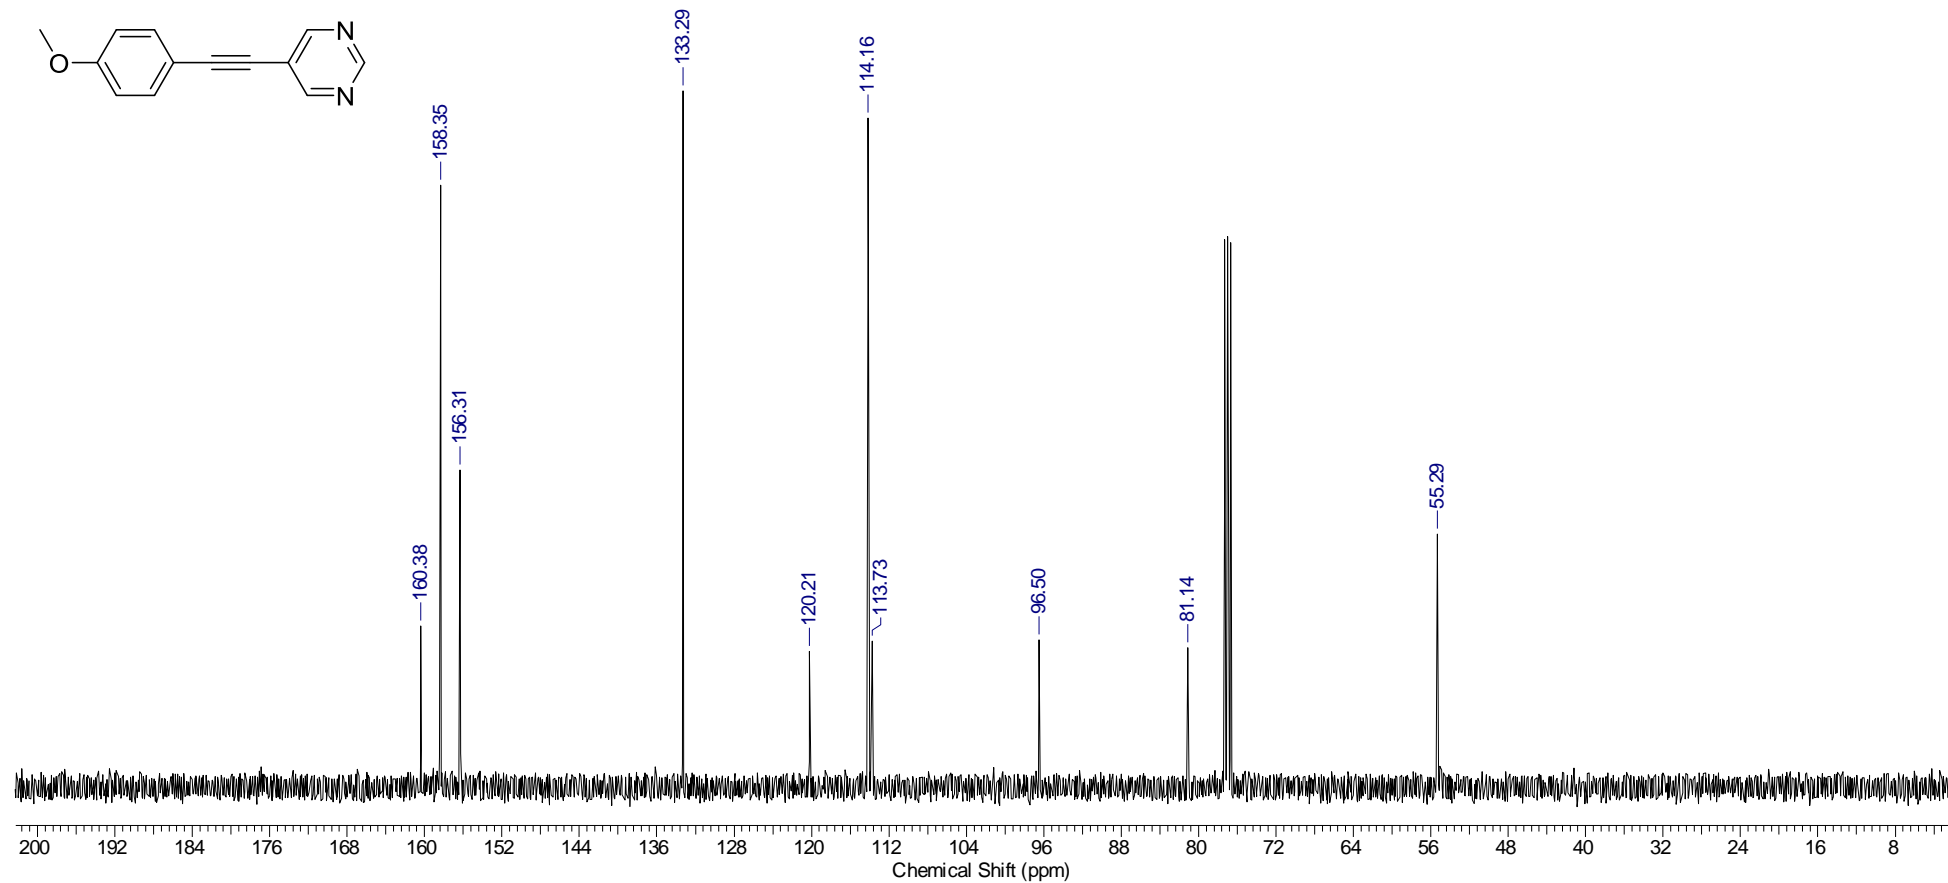

2-[(4-Methoxyphenyl)ethynyl]-1-methyl-1H-benzimidazole (3t)

<sup>1</sup>H NMR (400 MHz, CDCl<sub>3</sub>)

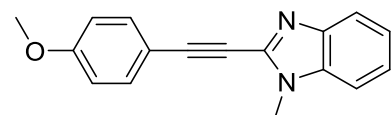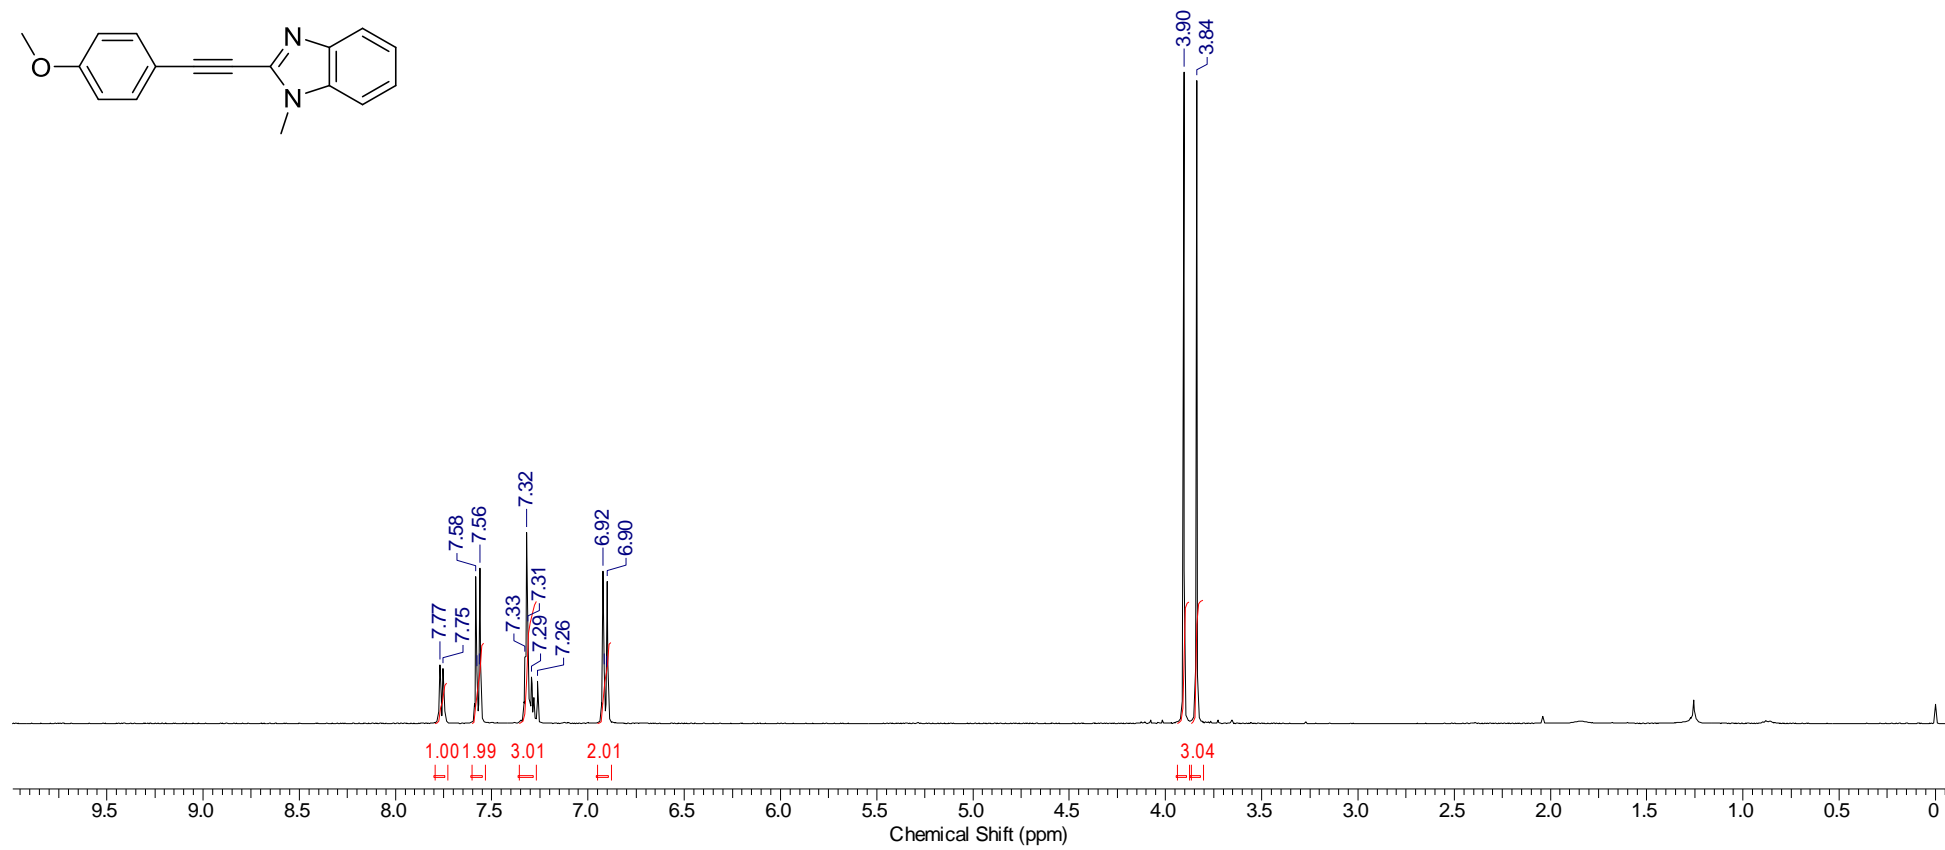

**1-Methyl-4-[(4-nitrophenyl)ethynyl]benzene (3u)**

<sup>1</sup>H NMR (400 MHz, CDCl<sub>3</sub>)

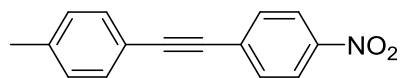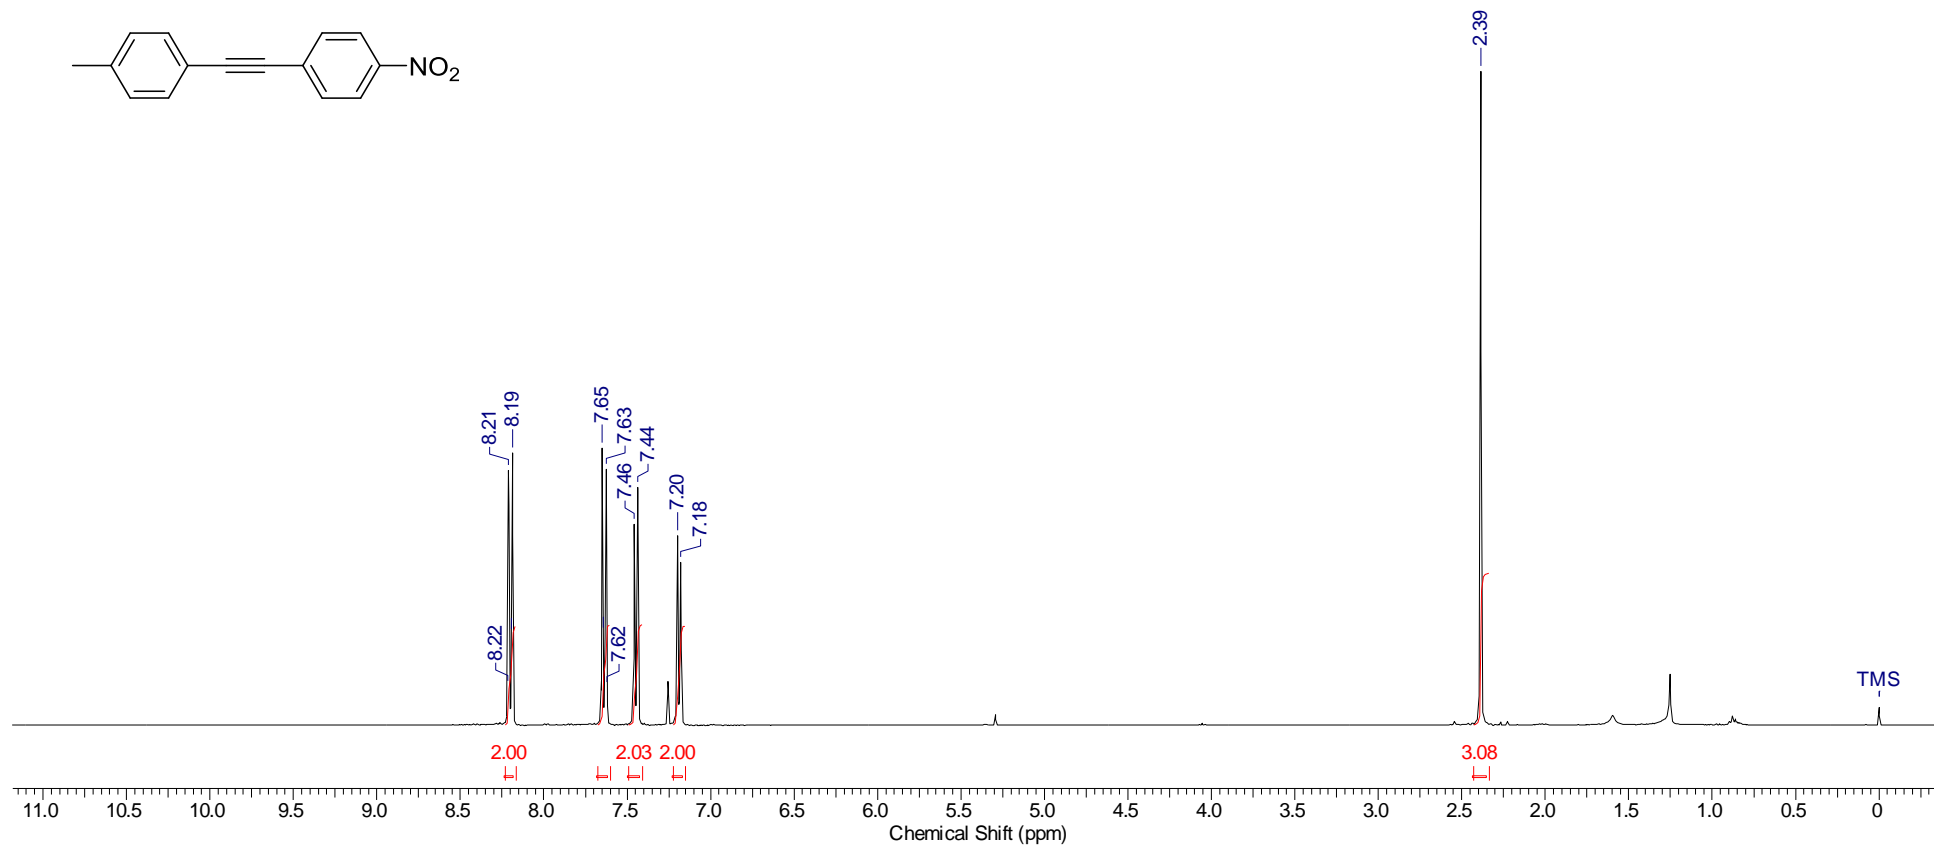

### 3-[(4-Nitrophenyl)ethynyl]pyridine (3v)

$^1\text{H}$  NMR (400 MHz,  $\text{CDCl}_3$ )

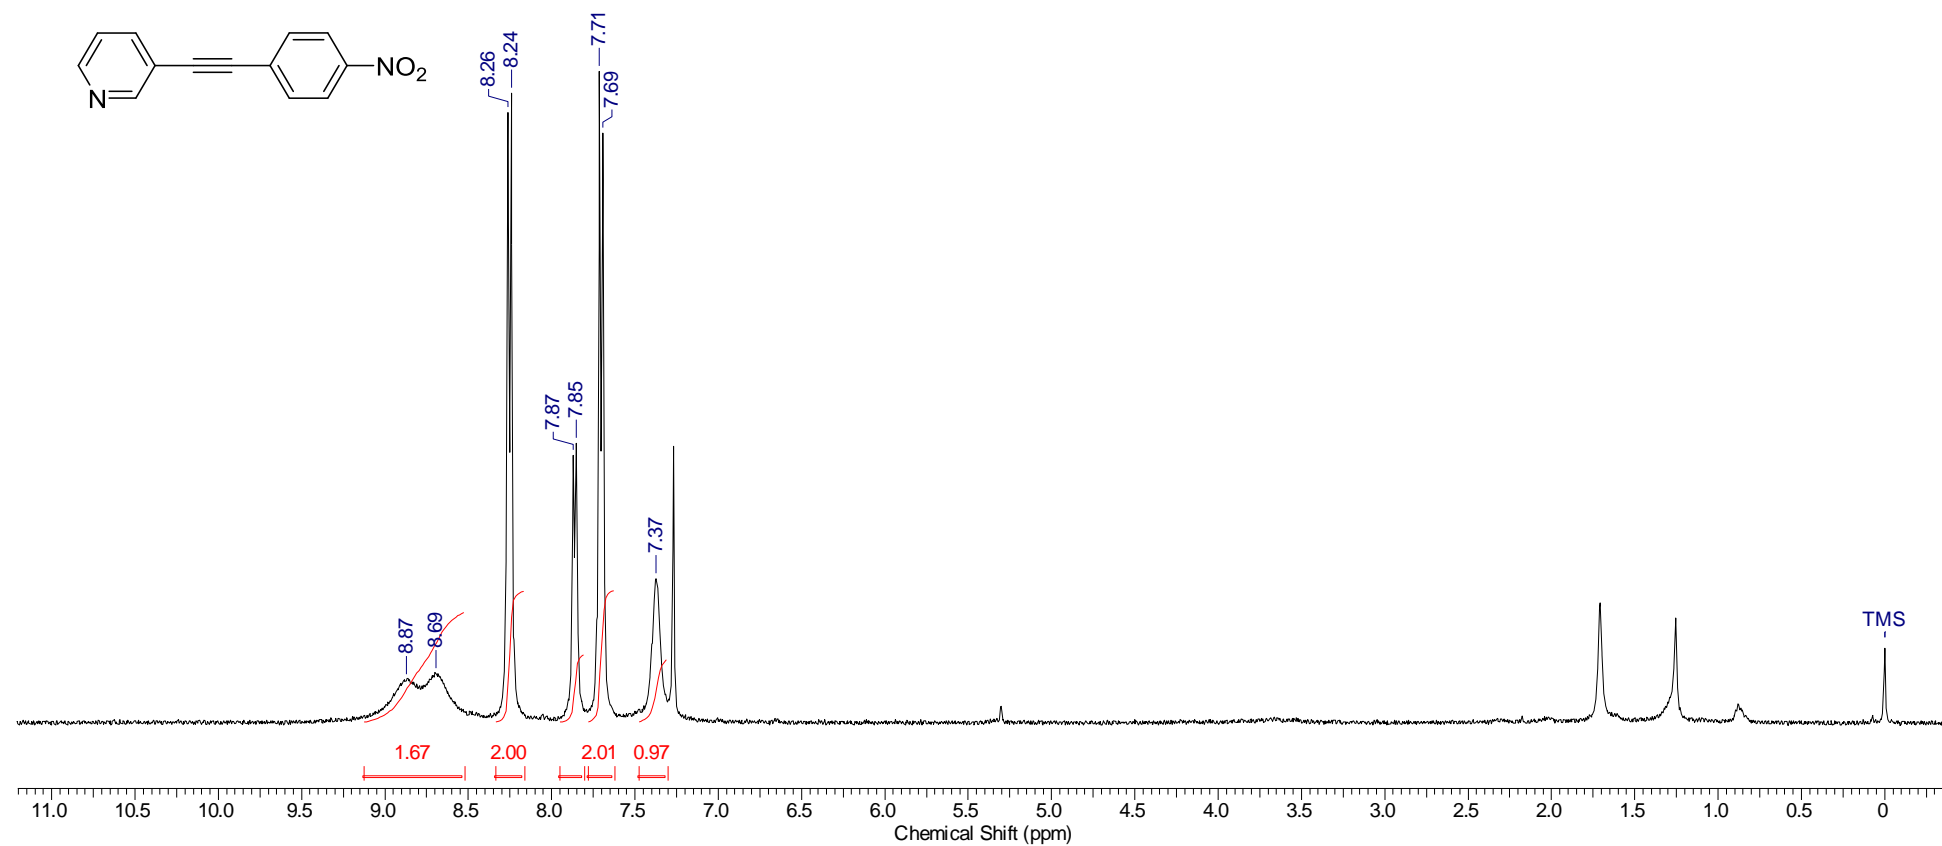

### 3-[(4-Nitrophenyl)ethynyl]quinoline (3w)

$^1\text{H}$  NMR (400 MHz,  $\text{DMSO-}d_6$ - $\text{CCl}_4$ )

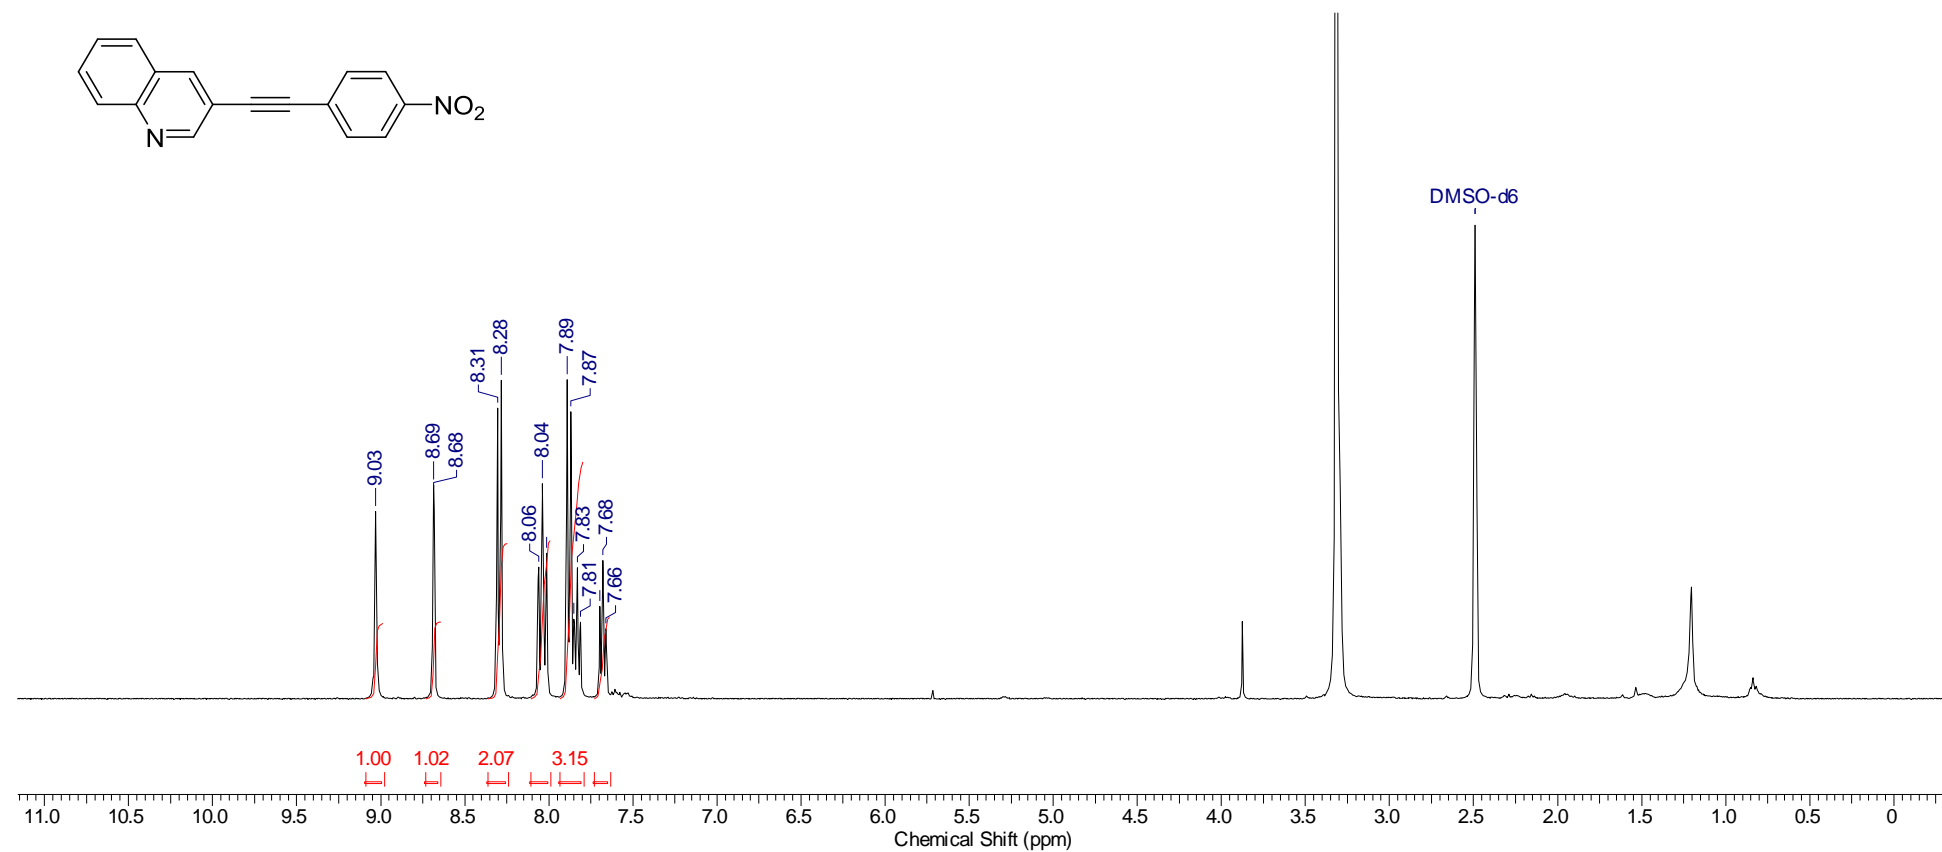



### 3-[(4-Nitrophenyl)ethynyl]quinoline (3w)

$^{13}\text{C}$  NMR (100 MHz,  $\text{DMSO-}d_6\text{-CCl}_4$ )

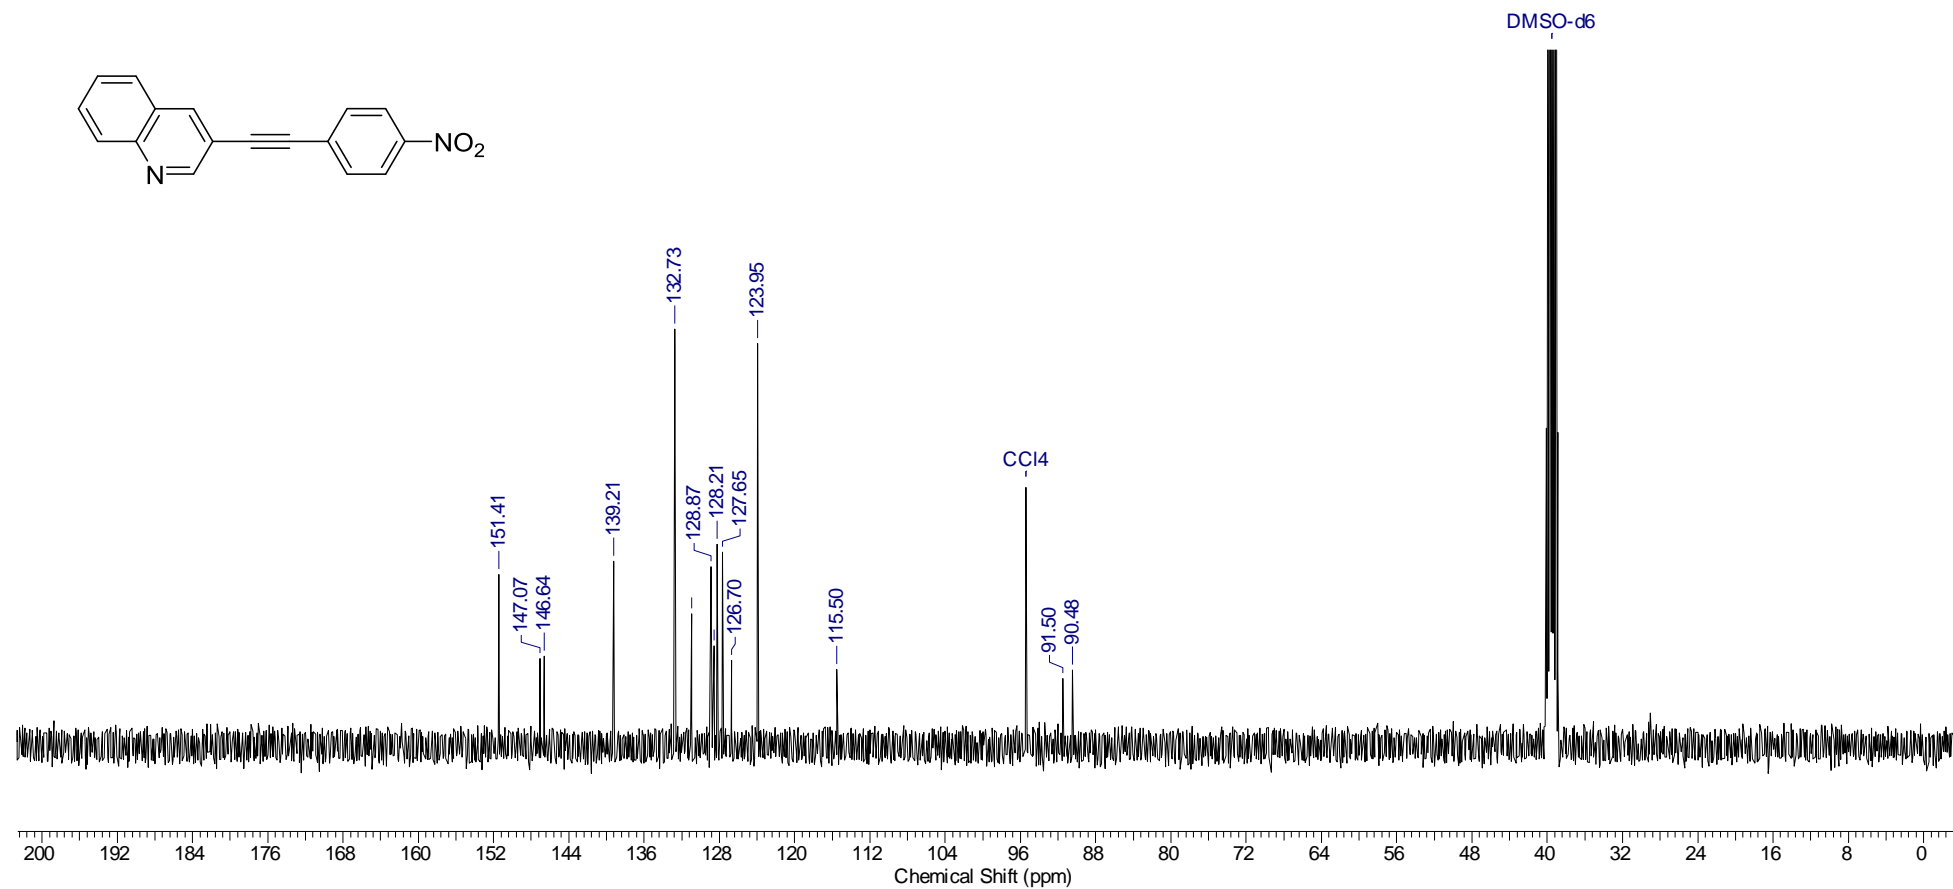

**[(4-Nitrophenyl)ethynyl]ferrocene (3x)**

<sup>1</sup>H NMR (400 MHz, CDCl<sub>3</sub>)

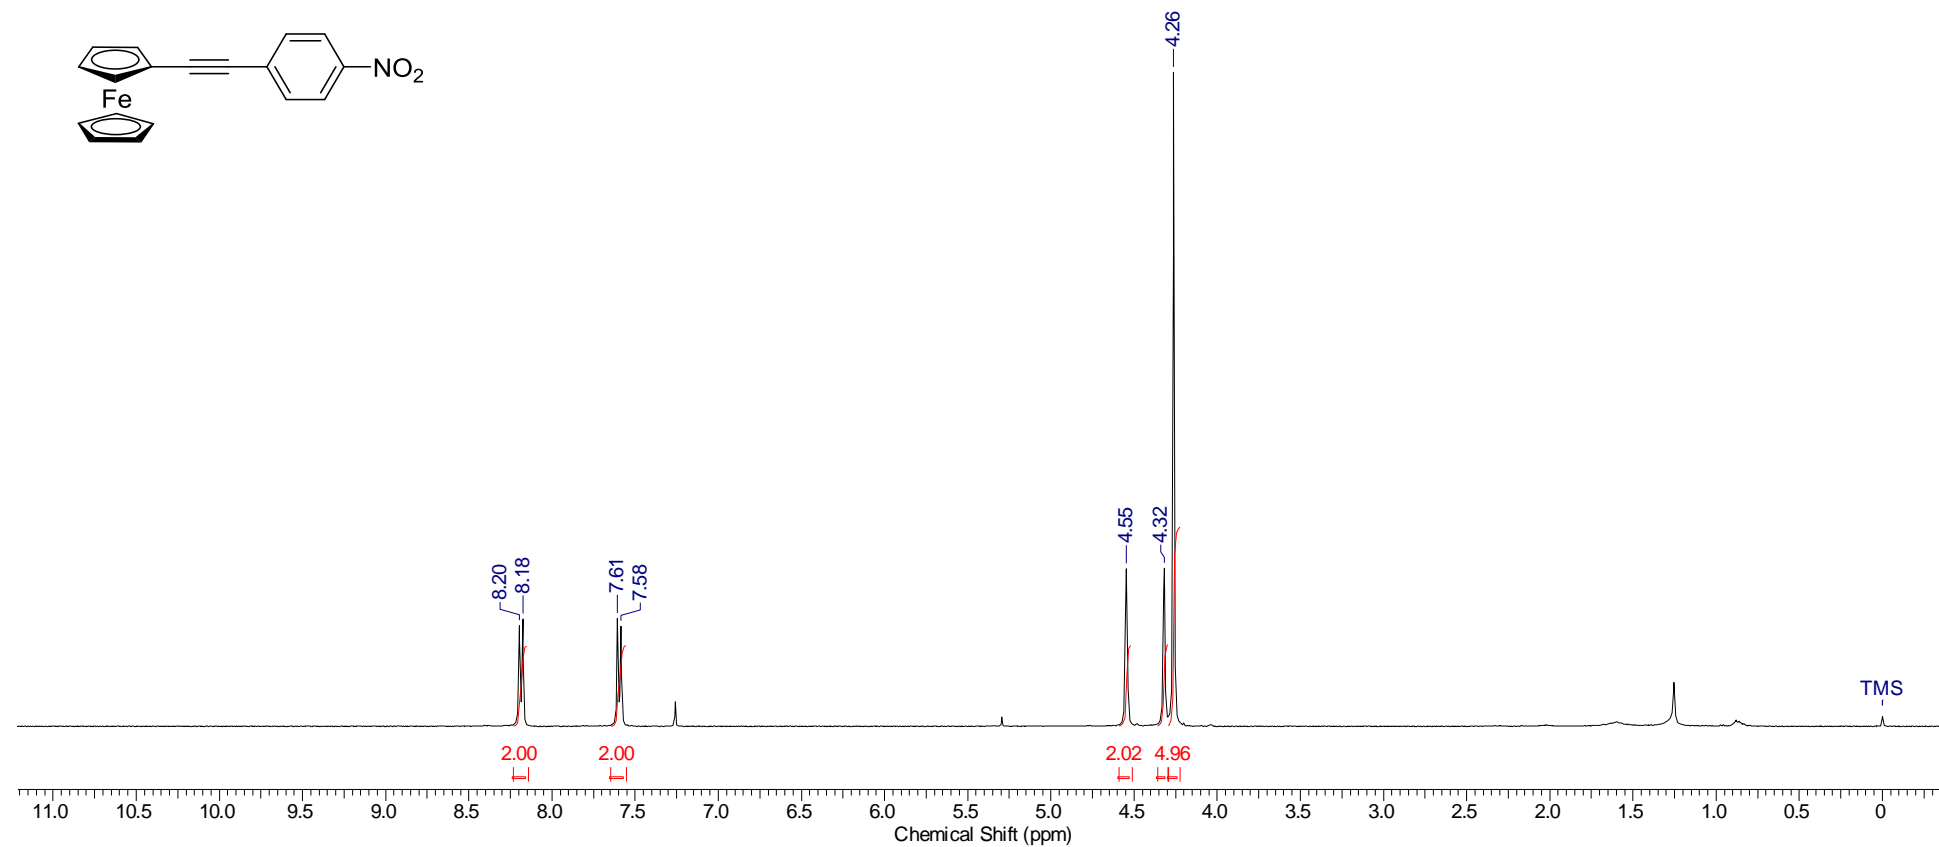

### [(4-Nitrophenyl)ethynyl]ferrocene (3x)

$^{13}\text{C}$  NMR (100 MHz,  $\text{CDCl}_3$ )

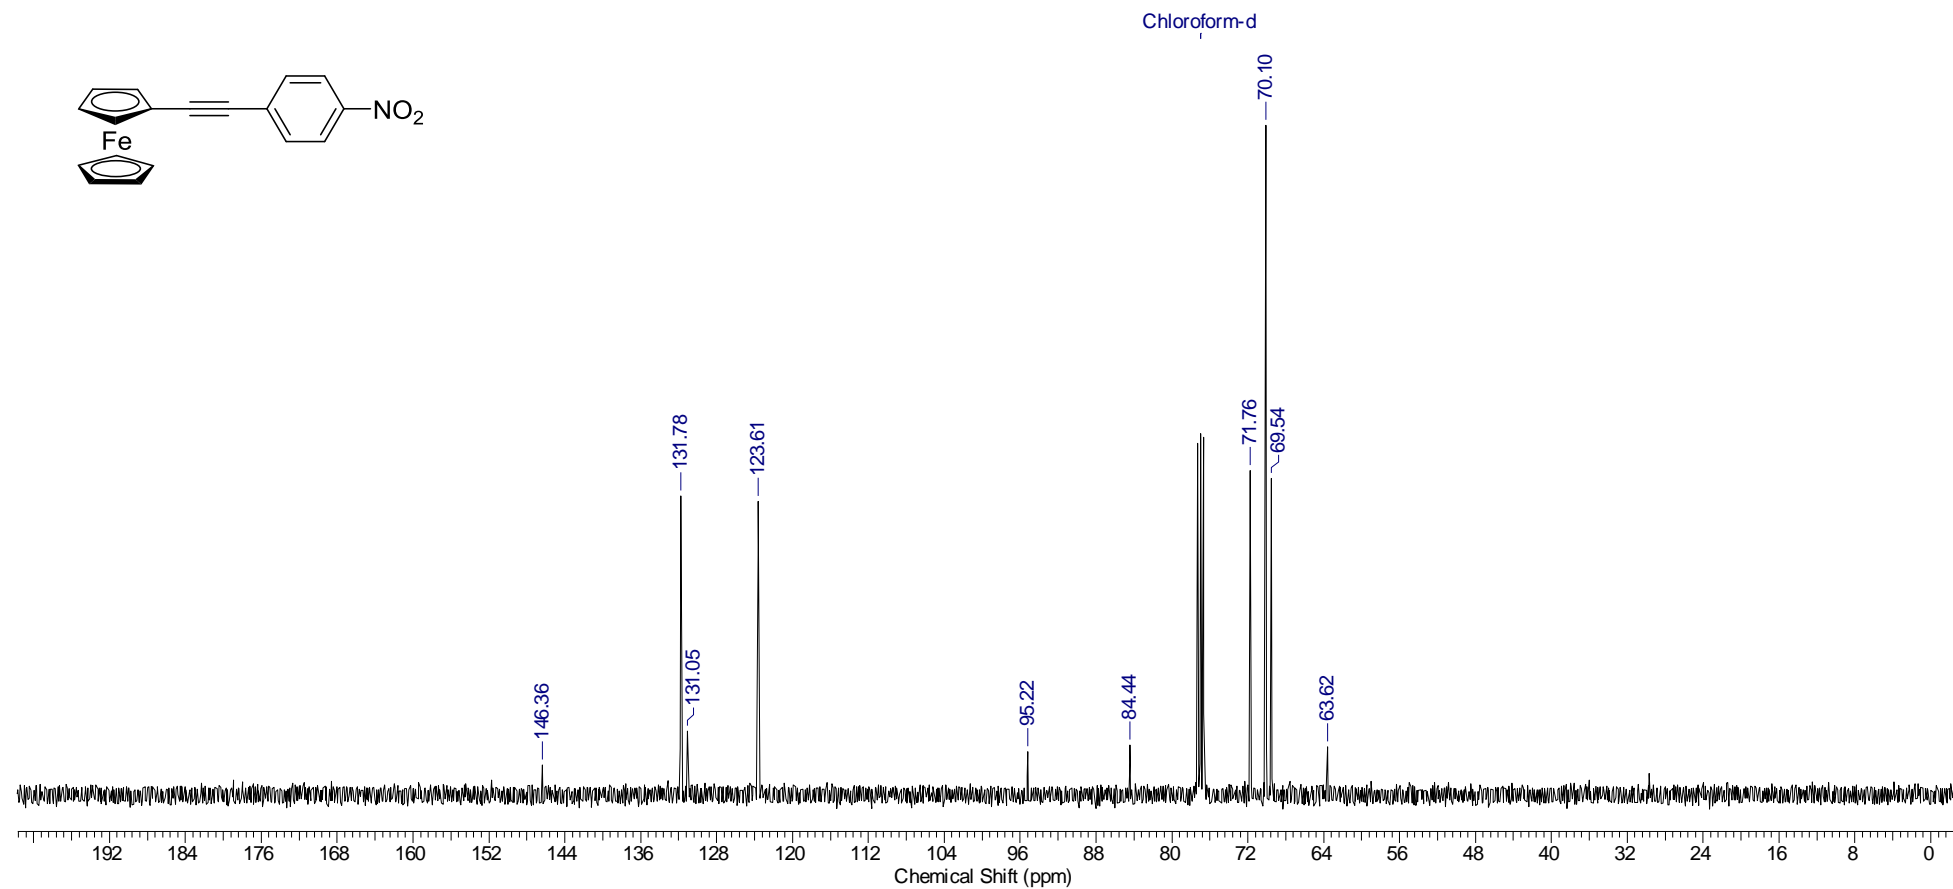

4-[(4-Nitrophenyl)ethynyl]benzonitrile (3y)

<sup>1</sup>H NMR (400 MHz, CDCl<sub>3</sub>)

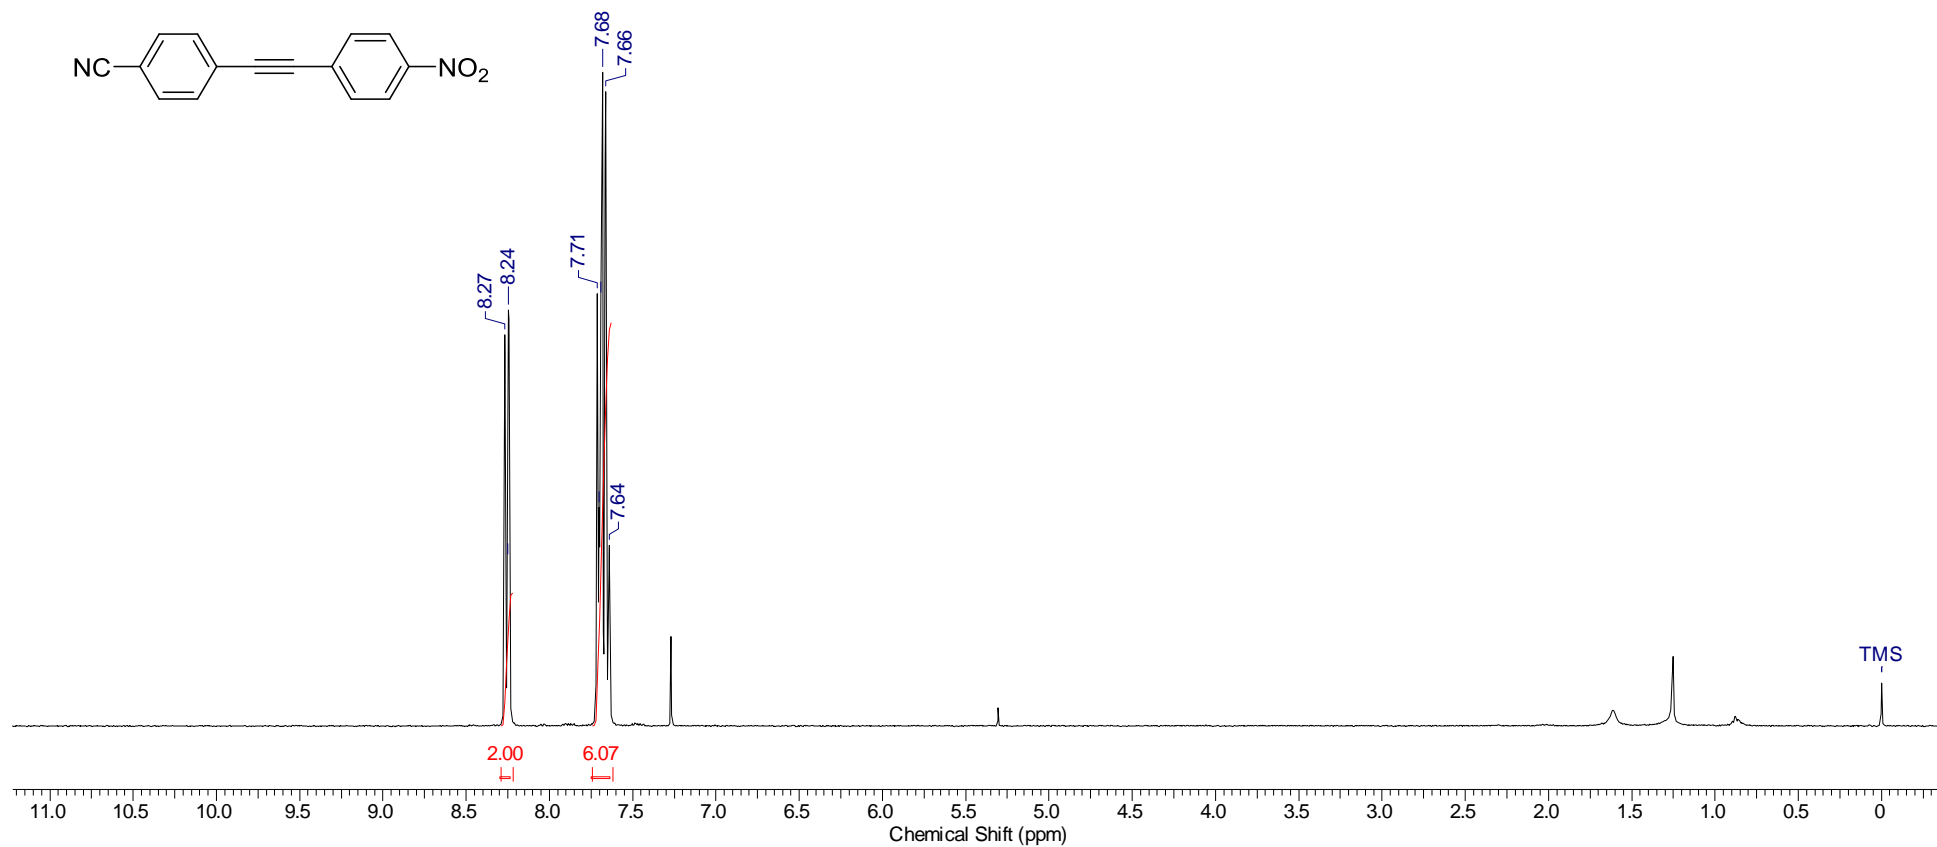

**1,1'-Ethyne-1,2-diylbis(4-nitrobenzene) (3z)**

<sup>1</sup>H NMR (400 MHz, CDCl<sub>3</sub>)

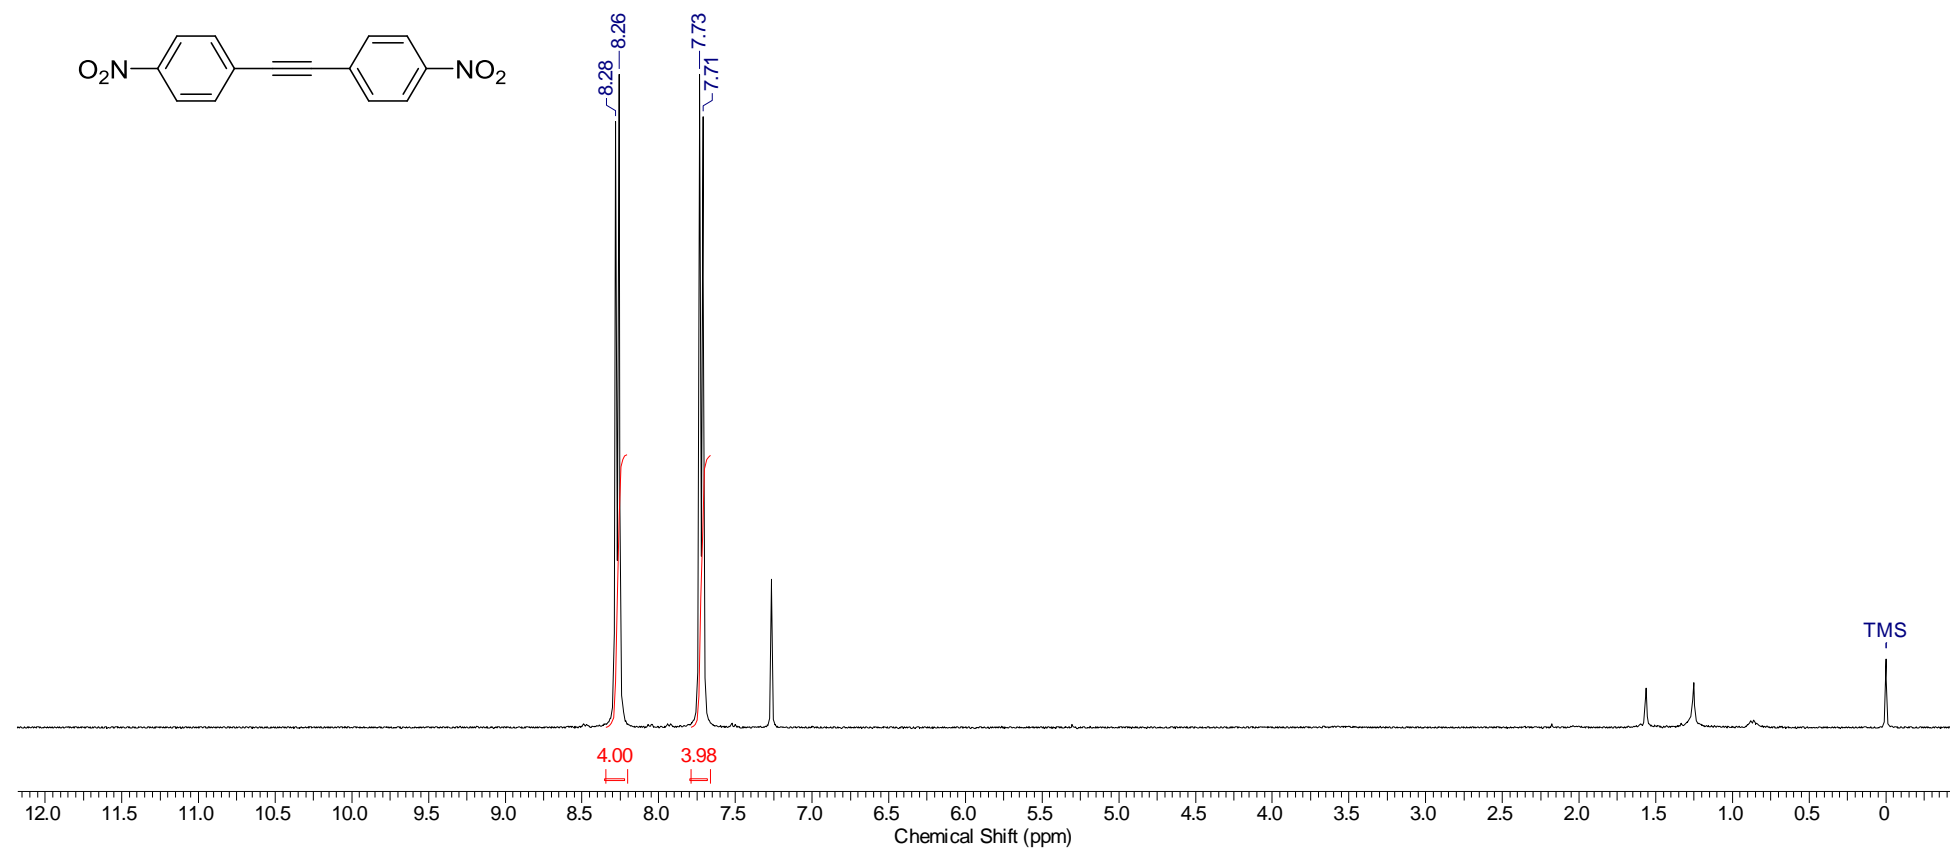

**1-Methoxy-4-[4-phenylbut-3-en-1-yn-1-yl]benzene (*E:Z* = 10:1) (5a)**

<sup>1</sup>H NMR (400 MHz, CDCl<sub>3</sub>)

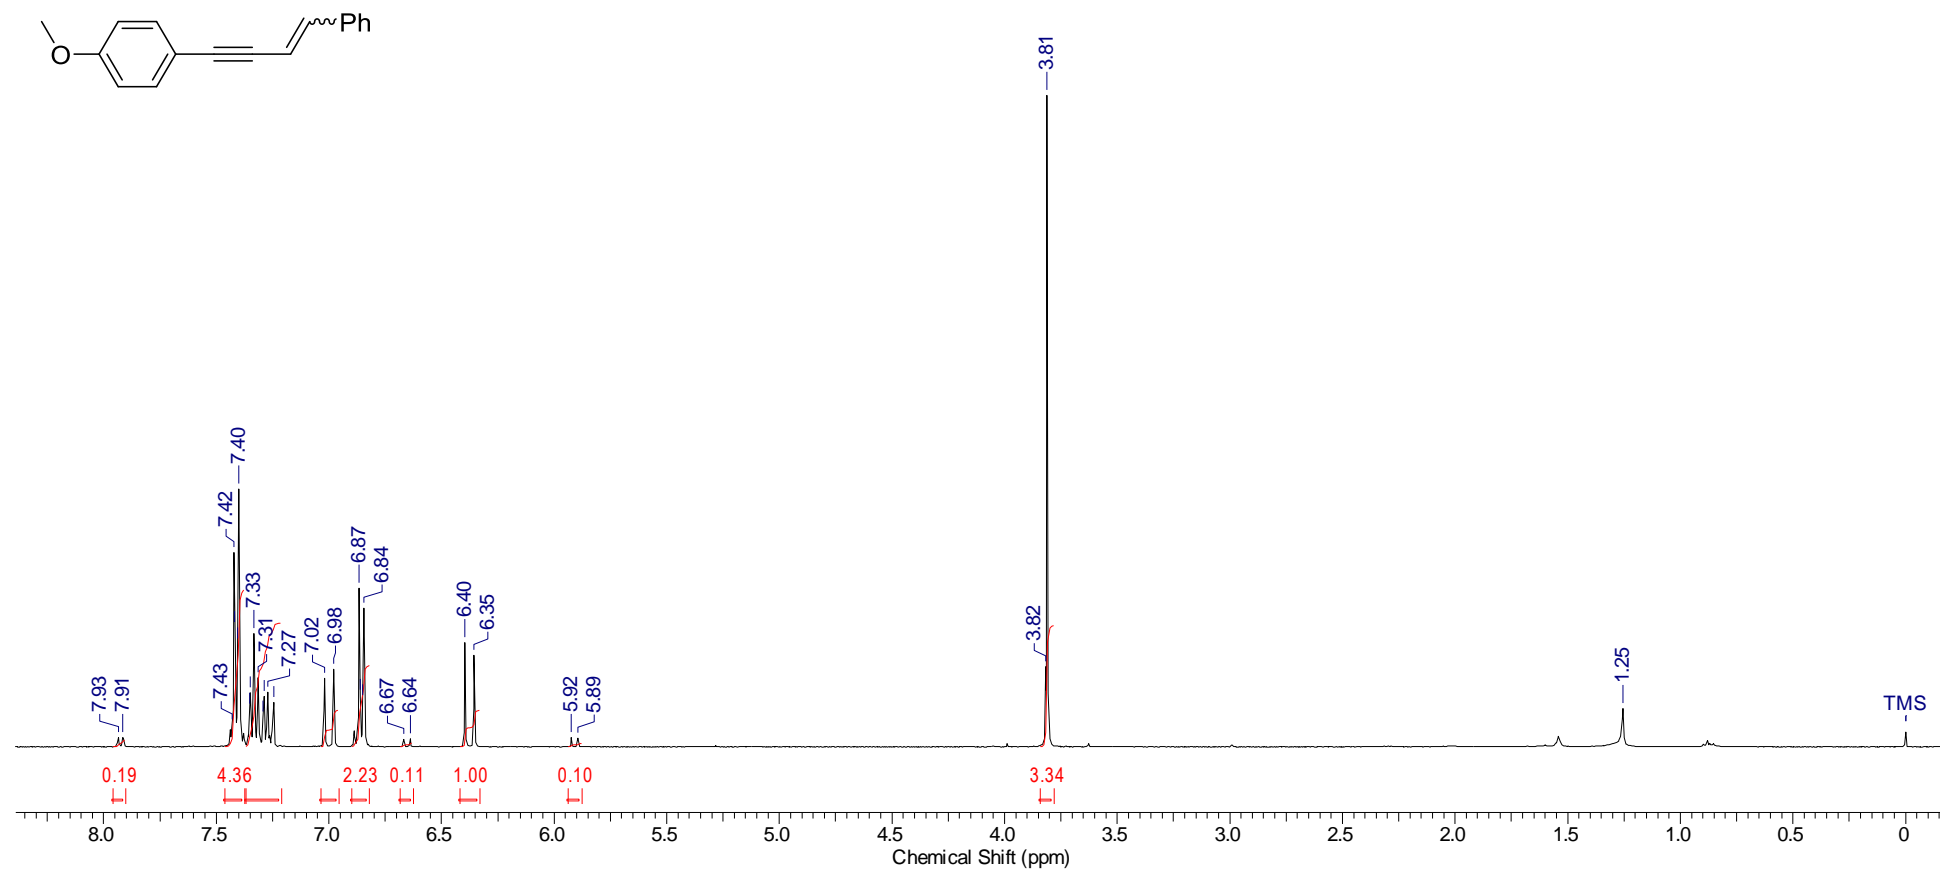

**1,1'-(*IE*)-But-1-en-3-yne-1,4-diylbis(4-methoxybenzene) (*E*)-5b**

<sup>1</sup>H NMR (400 MHz, CDCl<sub>3</sub>)

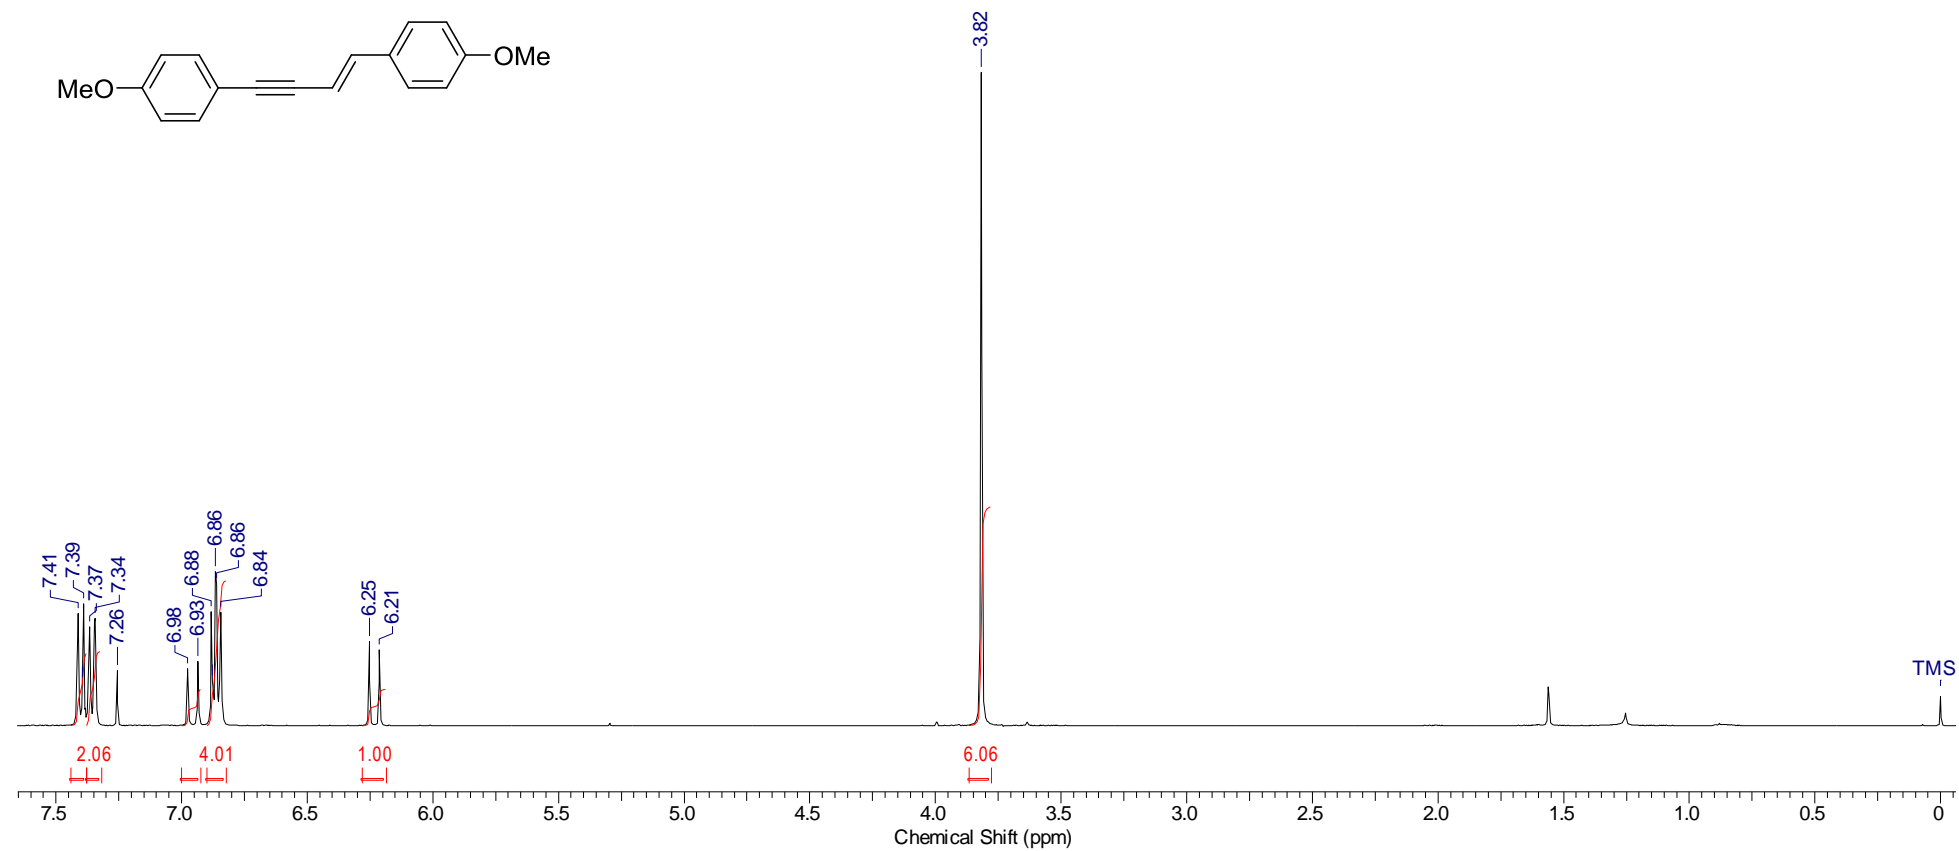

**1,1'-But-1-en-3-yne-1,4-diylbis(4-methoxybenzene) *E/Z* = 2:5 (5b)**

<sup>1</sup>H NMR (400 MHz, CDCl<sub>3</sub>)

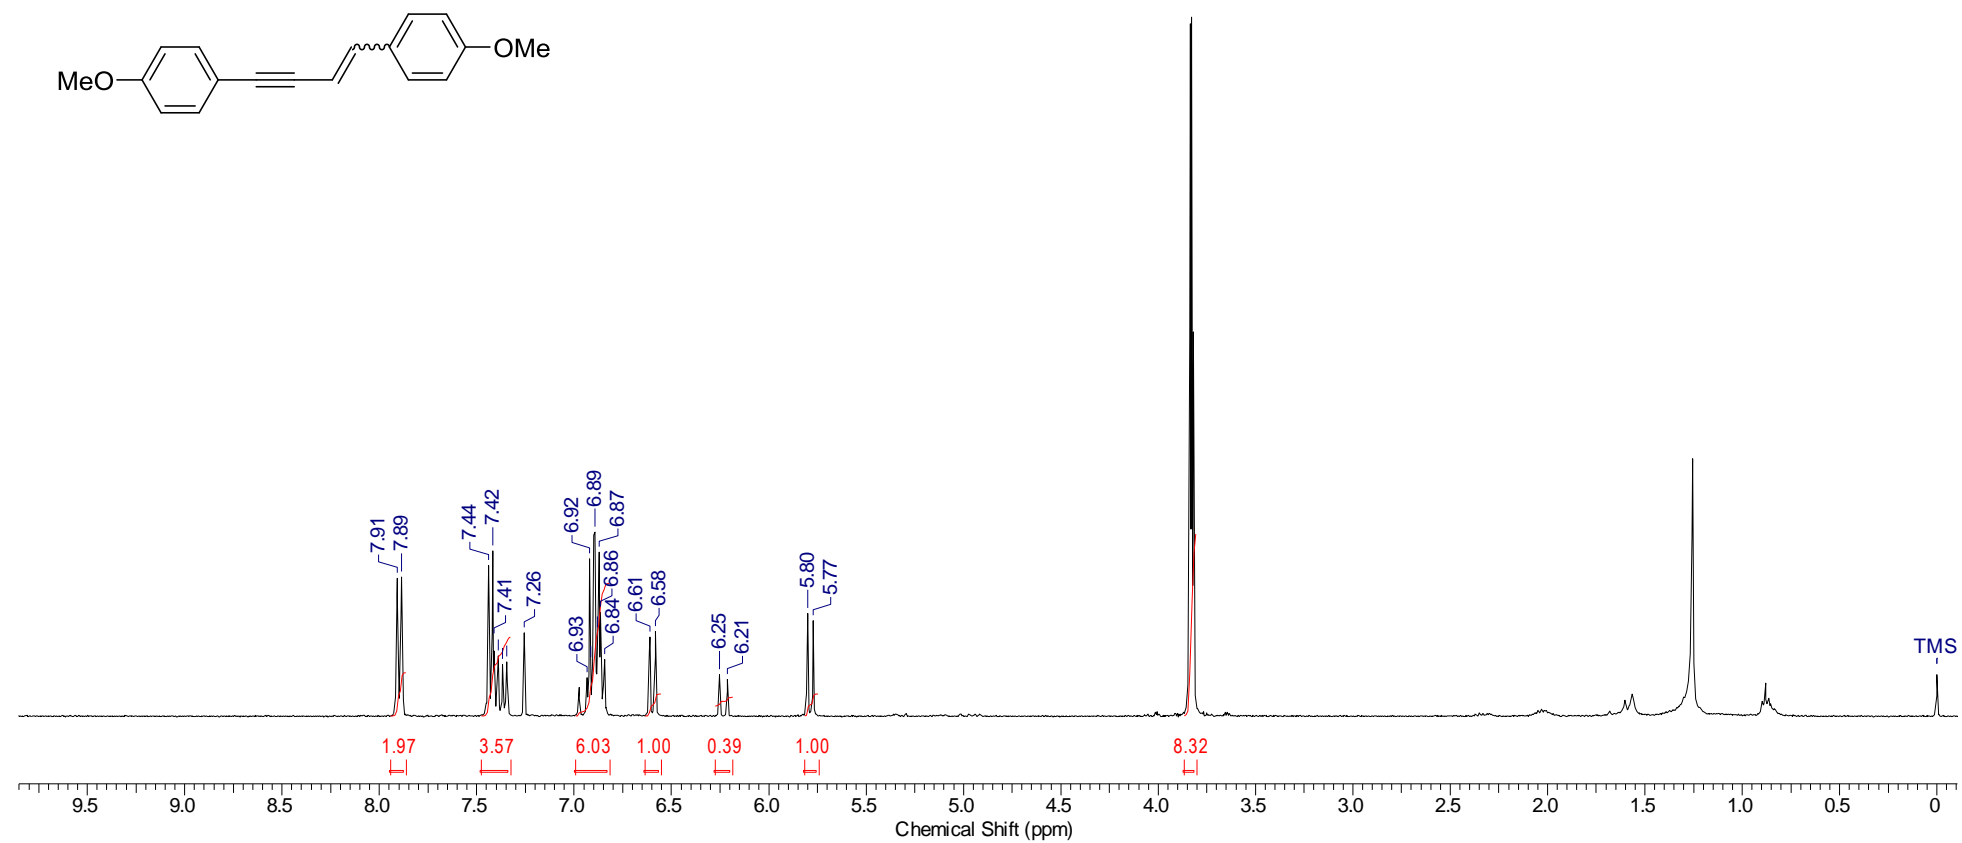



**1-(Cyclohex-1-en-1-ylethynyl)-4-methoxybenzene (5c)**

<sup>1</sup>H NMR (400 MHz, CDCl<sub>3</sub>)

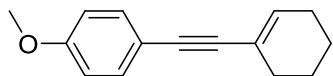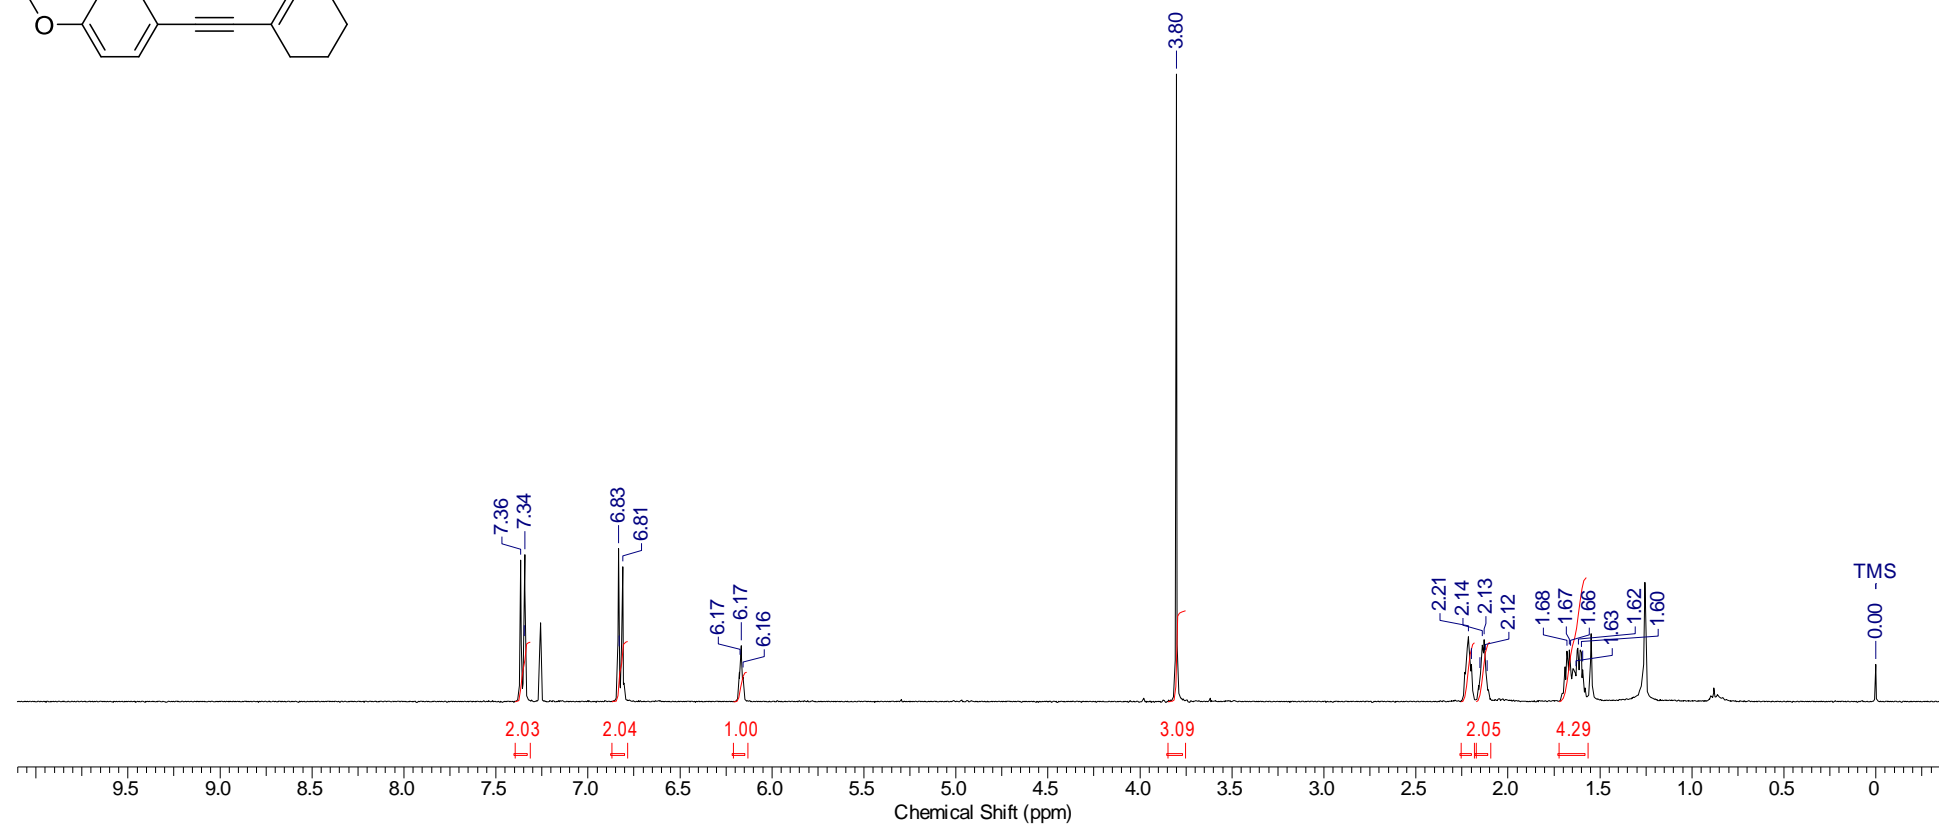

### 3-[4-(4-Methoxyphenyl)buta-1,3-diyne-1-yl]quinoline (5d)

$^1\text{H}$  NMR (400 MHz,  $\text{CDCl}_3$ )

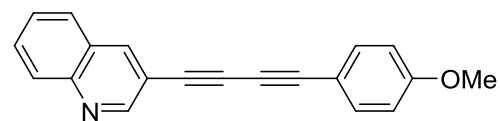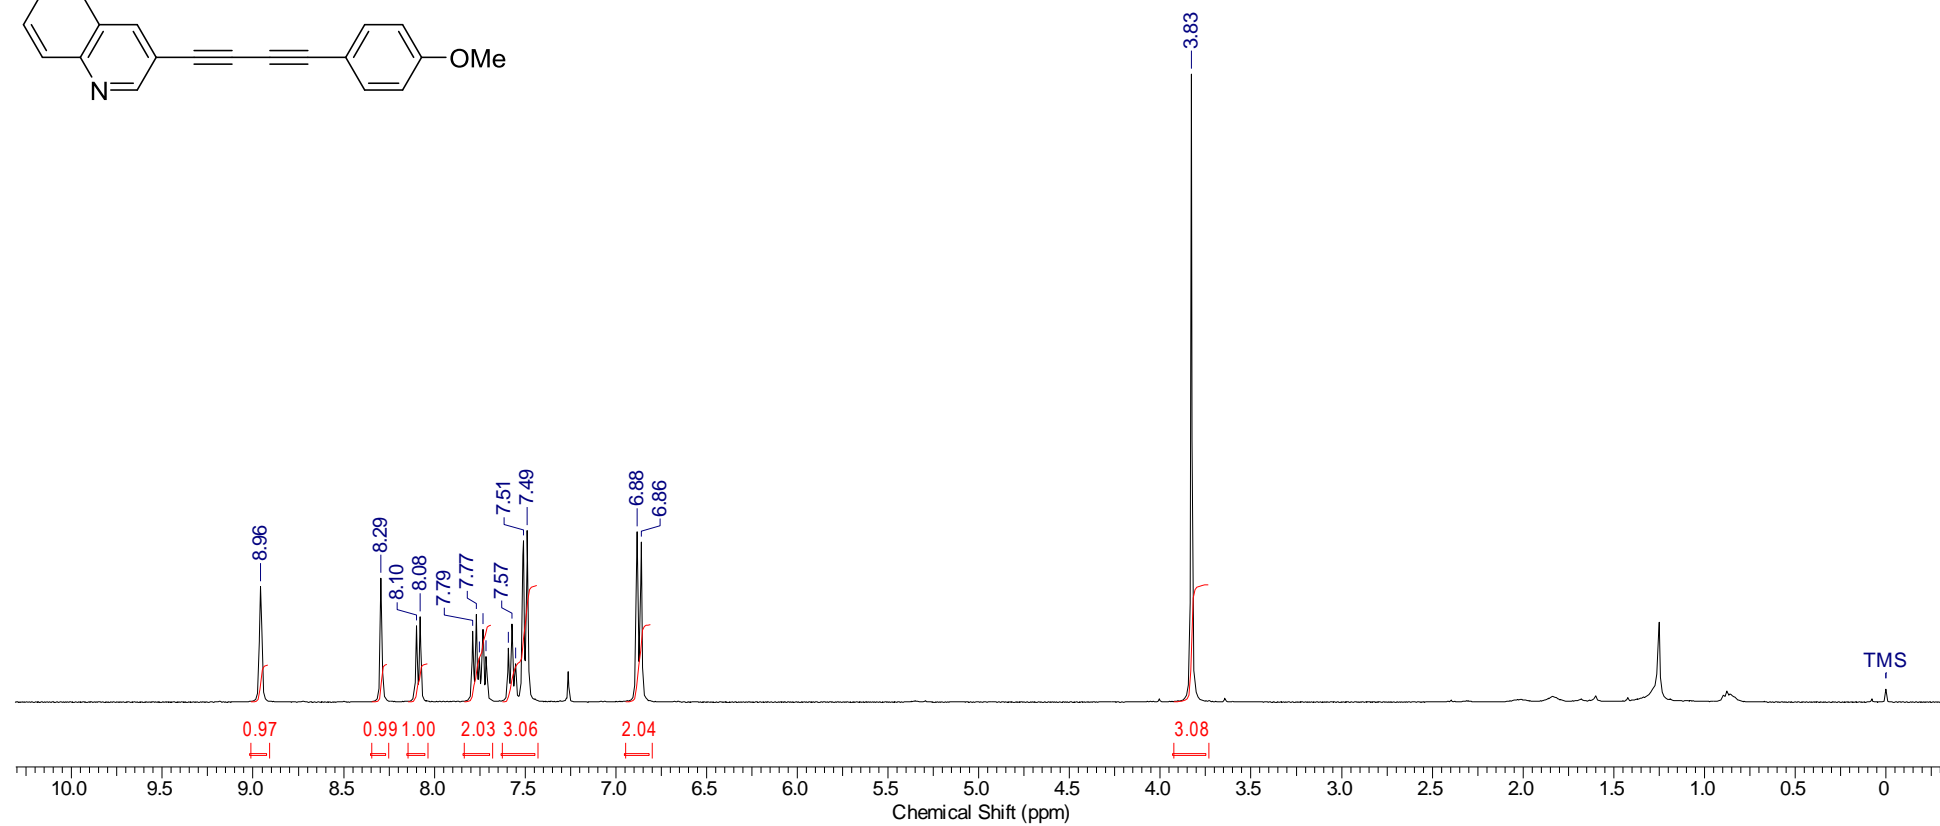

### 3-[4-(4-Methoxyphenyl)buta-1,3-diyne-1-yl]quinoline (5d)

$^{13}\text{C}$  NMR (100 MHz,  $\text{CDCl}_3$ )

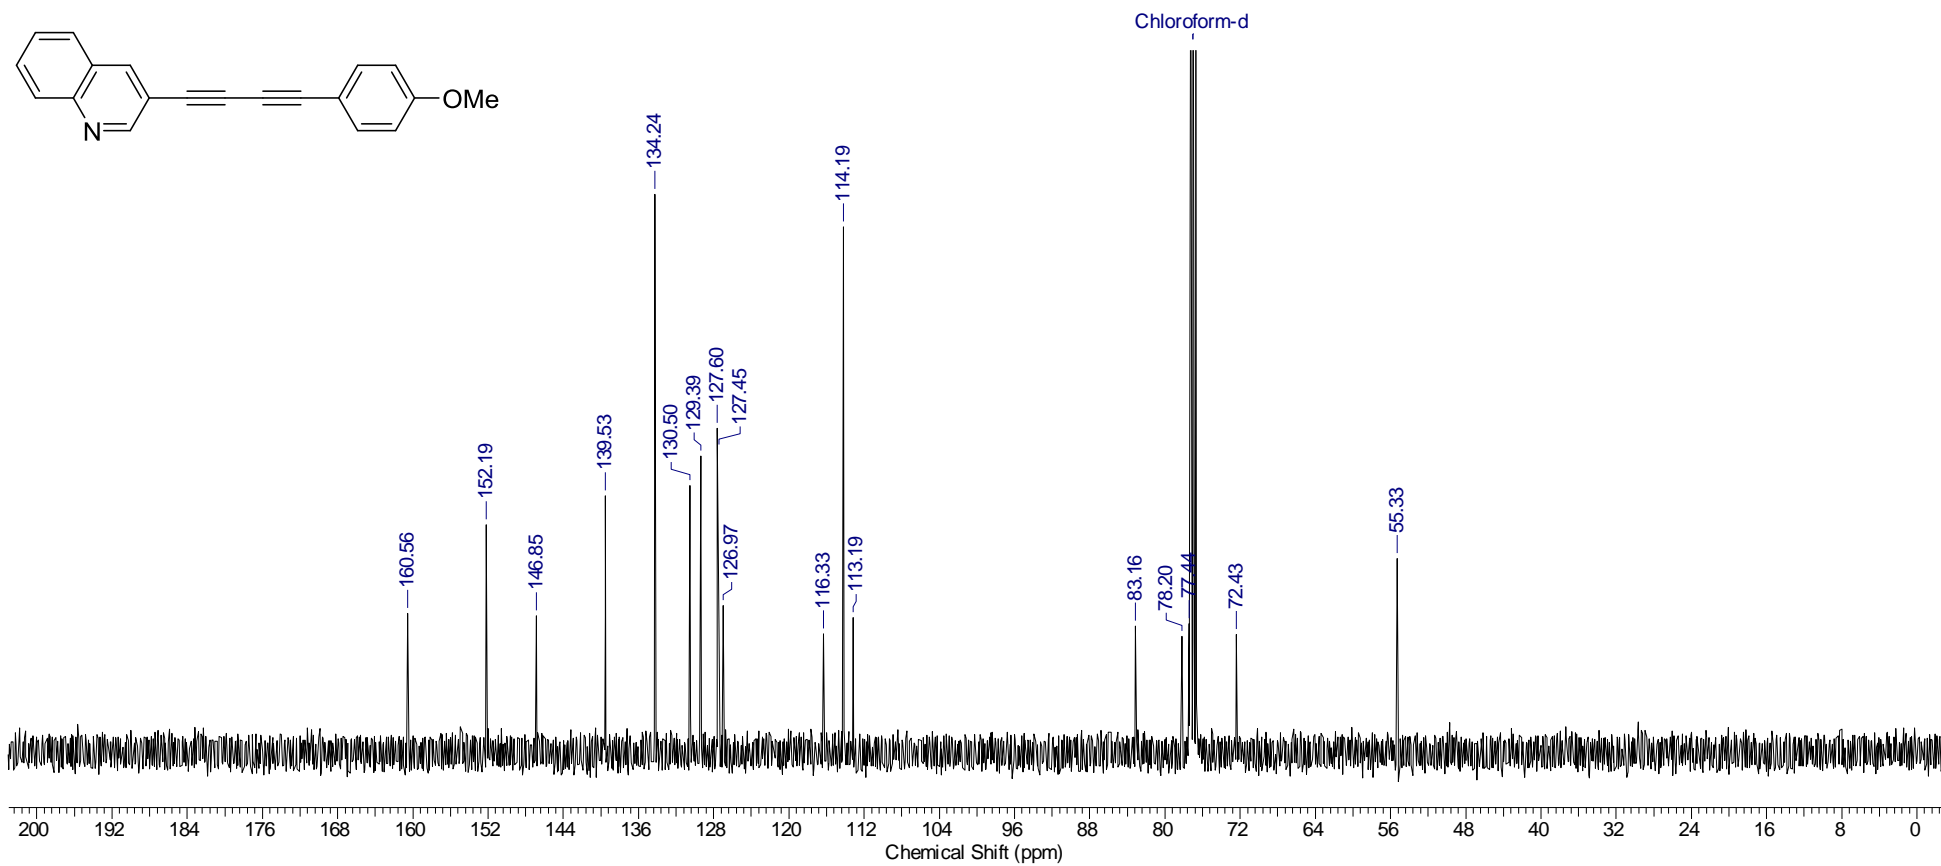

17-[(4-Methoxyphenyl)ethynyl]androsta-4,16-dien-3-one (5e)

<sup>1</sup>H NMR (400 MHz, CDCl<sub>3</sub>)

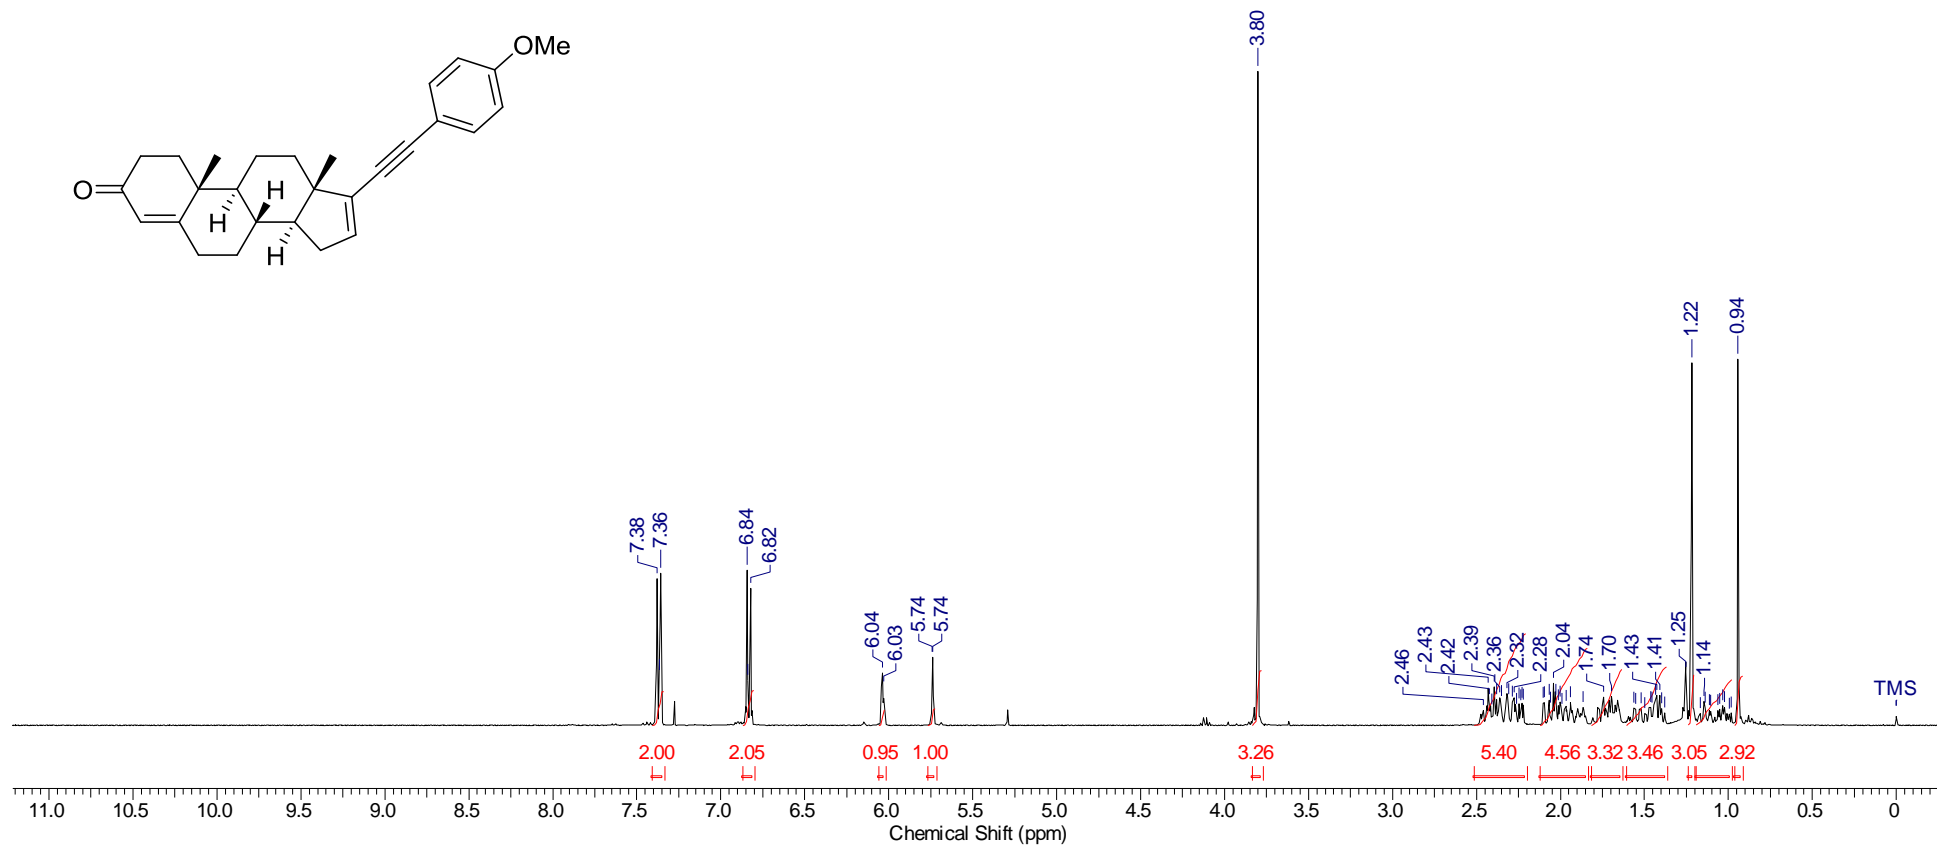

3-[(4-Methoxyphenyl)ethynyl]androsta-3,5-dien-17 $\beta$ -ol (5f)

$^1\text{H}$  NMR (400 MHz,  $\text{CDCl}_3$ - $\text{CD}_3\text{OD}$ )

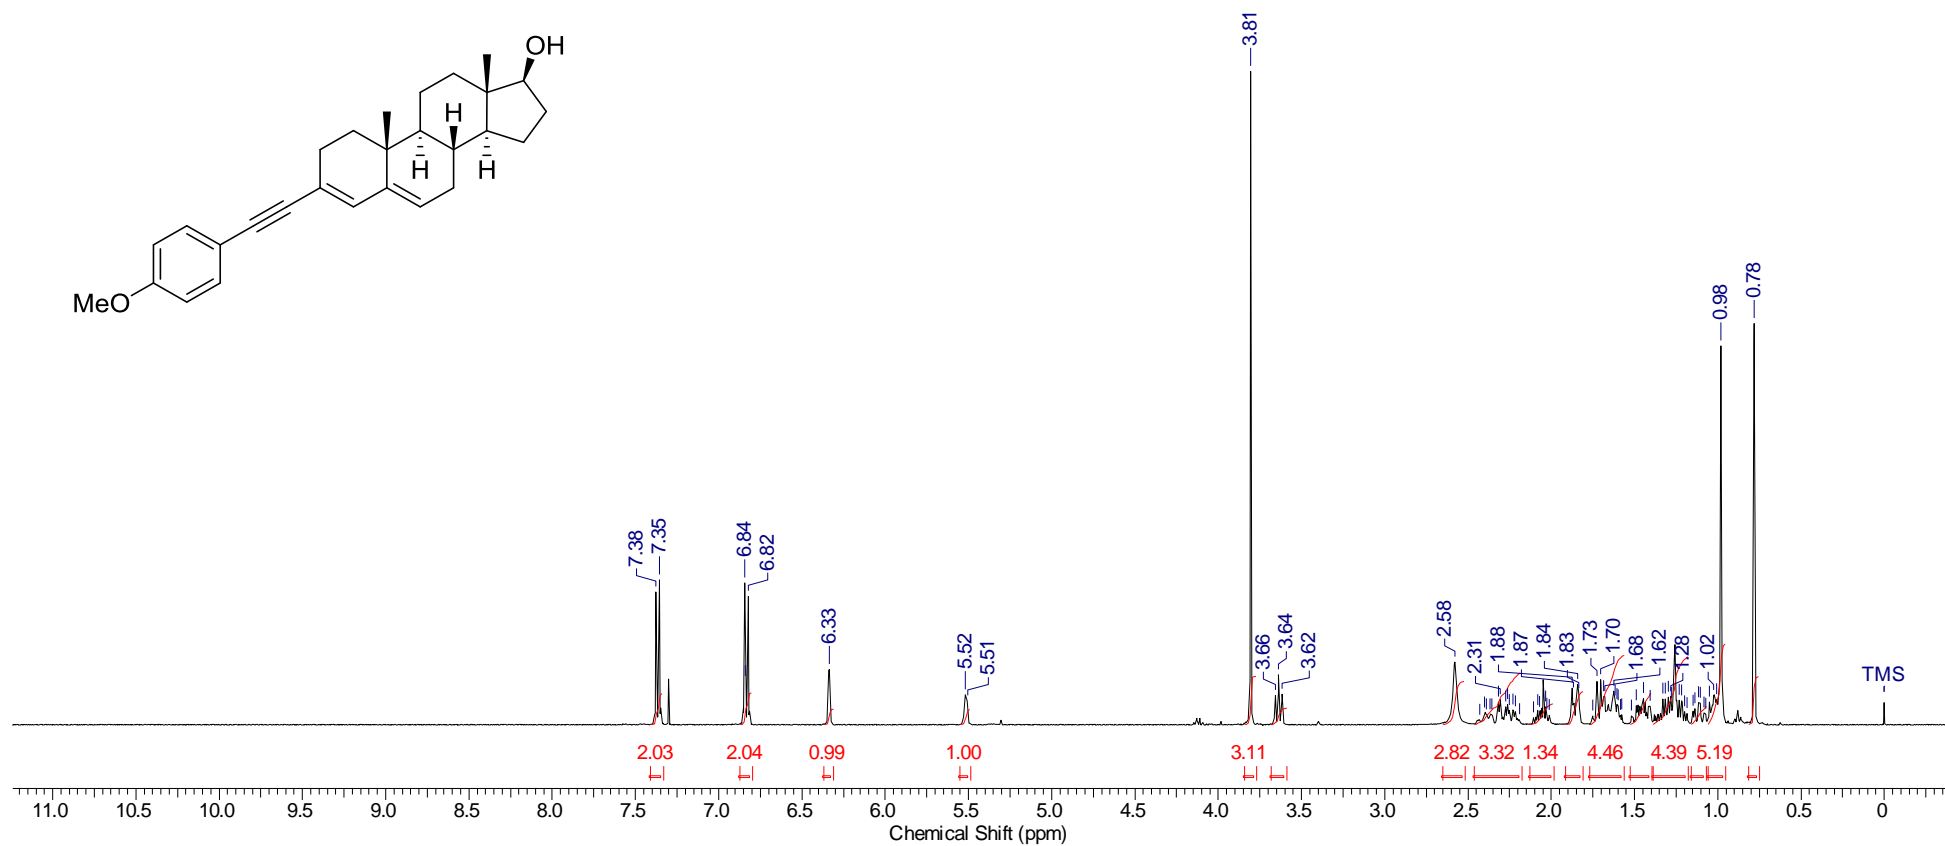

3-[(4-Methoxyphenyl)ethynyl]androsta-3,5-dien-17 $\beta$ -ol (5f)

$^{13}\text{C}$  NMR (100 MHz,  $\text{CDCl}_3\text{-CD}_3\text{OD}$ )

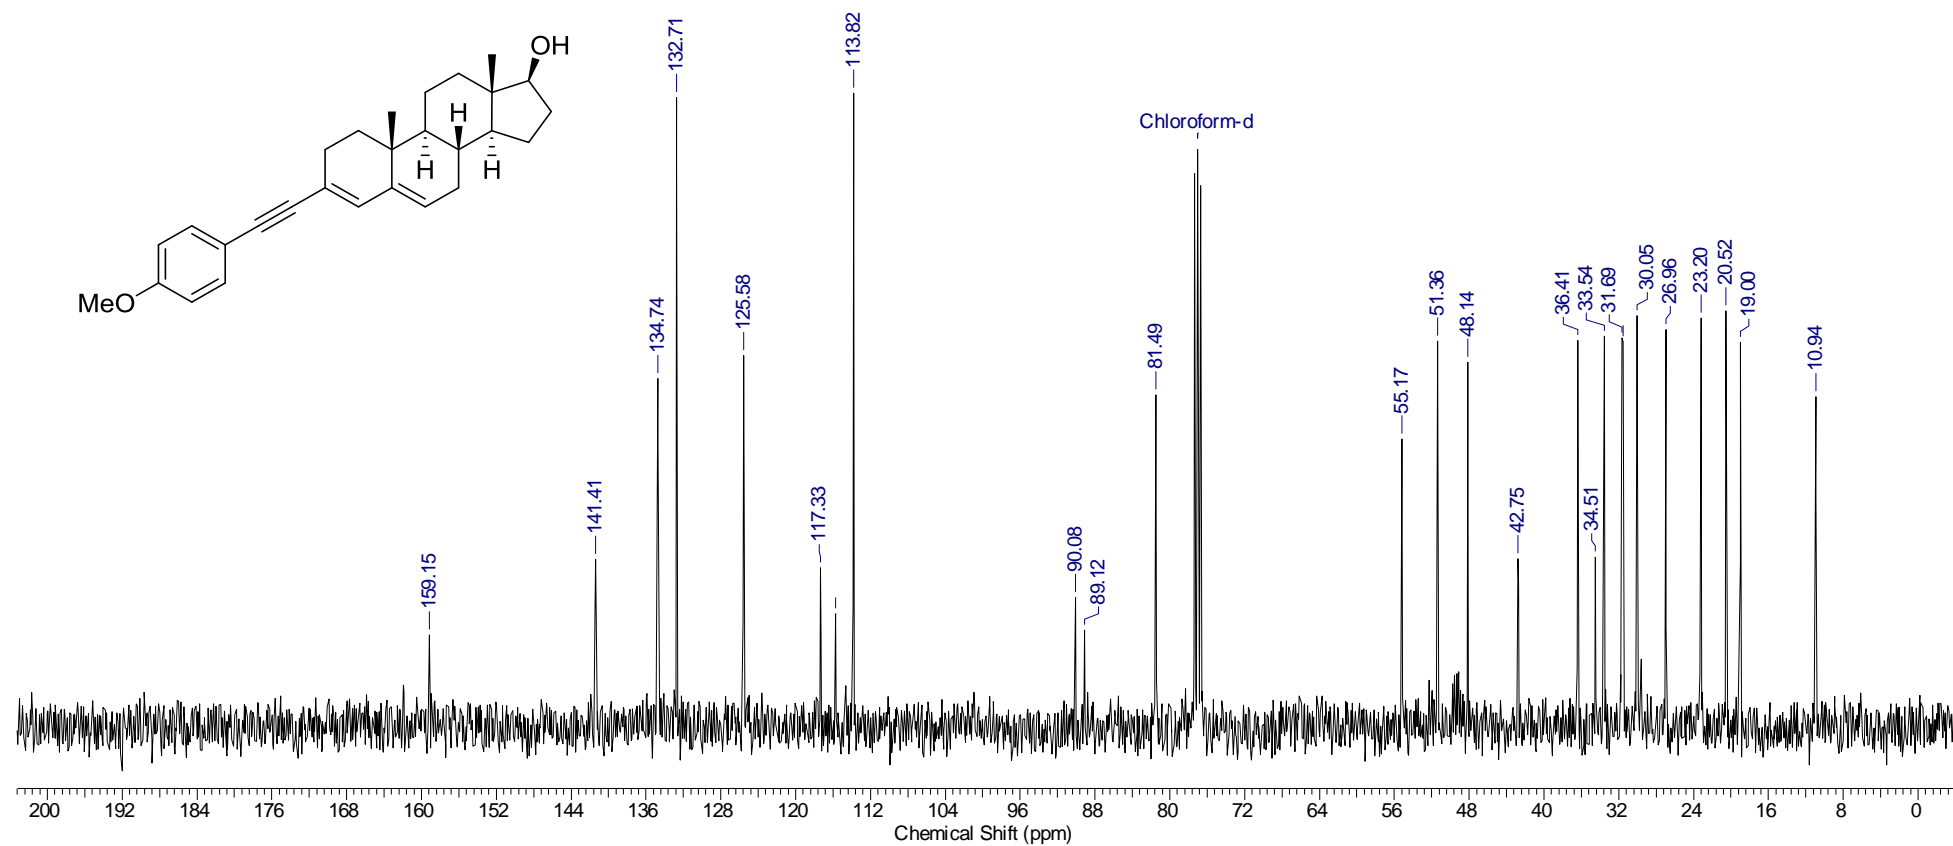

## References

- <sup>1</sup> Y. N. Kotovshchikov, G. V. Latyshev, N. V. Lukashev and I. P. Beletskaya, *Eur. J. Org. Chem.*, 2013, 7823–7832.
- <sup>2</sup> V. P. Dyadchenko, M. A. Dyadchenko, V. N. Okulov and D. A. Lemenovskii, *J. Organomet. Chem.*, 2011, **696**, 468–472.
- <sup>3</sup> S. Ruengsangtongkul, N. Chaisan, C. Thongsornkleeb, J. Tummatorn and S. Ruchirawat, *Org. Lett.*, 2019, **21**, 2514–2517.
- <sup>4</sup> L. Liang, H.-Y. Niu, R.-L. Li, Y.-F. Wang, J.-K. Yan, C.-G. Li and H.-M. Guo, *Org. Lett.*, 2020, **22**, 6842–6846.
- <sup>5</sup> Y.-H. Chen, C. P. Tüllmann, M. Ellwart and P. Knochel, *Angew. Chem. Int. Ed.*, 2017, **56**, 9236–9239.
- <sup>6</sup> M. Csékei, Z. Novák and A. Kotschy, *Tetrahedron*, 2008, **64**, 975–982.
- <sup>7</sup> D. Jung, S. Y. Park and S. Kim, *Bull. Korean Chem. Soc.*, 2022, **43**, 110–116.
- <sup>8</sup> B.-B. Wang, Y.-M. Ye, J.-J. Chen, X.-X. Zhou, J.-M. Lu and L.-X. Shao, *Bull. Chem. Soc. Jpn.*, 2011, **84**, 526–530.
- <sup>9</sup> Y. Xu, J. Zhao, X. Tang, W. Wu and H. Jiang, *Adv. Synth. Catal.*, 2014, **356**, 2029–2039.
- <sup>10</sup> H. Peng, Y.-Q. Chen, S.-L. Mao, Y.-X. Pi, Y. Chen, Z.-Y. Lian, T. Meng, S.-H. Liu and G.-A. Yu, *Org. Biomol. Chem.*, 2014, **12**, 6944–6952.
- <sup>11</sup> R. Bernini, S. Cacchi, G. Fabrizi, G. Forte, F. Petrucci, A. Prastaro, S. Niembro, A. Shafir and A. Vallribera, *Org. Biomol. Chem.*, 2009, **7**, 2270–2273.
- <sup>12</sup> X.-T. Zhu, Q. Zhao, F. Liu, A.-F. Wang, P.-J. Cai, W.-J. Hao, S.-J. Tu and B. Jiang, *Chem. Commun.*, 2017, **53**, 6828–6831.
- <sup>13</sup> Y. Takemoto, H. Yoshida and K. Takaki, *Chem. Eur. J.*, 2012, **18**, 14841–14844.
- <sup>14</sup> H. Hu, F. Yang and Y. Wu, *J. Org. Chem.*, 2013, **78**, 10506–10511.
- <sup>15</sup> A. Elangovan, S.-W. Yang, J.-H. Lin, K.-M. Kao and T.-I. Ho, *Org. Biomol. Chem.*, 2004, **2**, 1597–1602.
- <sup>16</sup> S. Prateeptongkum, K. M. Driller, R. Jackstell, A. Spannenberg and M. Beller, *Chem. Eur. J.*, 2010, **16**, 9606–9615.
- <sup>17</sup> F. Bellina, M. Biagetti, S. Guariento, M. Lessi, M. Fausti, P. Ronchi and E. Rosadoni, *RSC Adv.*, 2021, **11**, 25504–25509.
- <sup>18</sup> A. Sapegin and M. Krasavin, *J. Org. Chem.*, 2019, **84**, 8788–8795.
- <sup>19</sup> S. S. Bag, R. Kundu and M. Das, *J. Org. Chem.*, 2011, **76**, 2332–2337.
- <sup>20</sup> S. Qiu, C. Zhang, R. Qiu, G. Yin and J. Huang, *Adv. Synth. Catal.*, 2018, **360**, 313–321.

- <sup>21</sup> S. Ahammed, D. Kundu and B. C. Ranu, *J. Org. Chem.*, 2014, **79**, 7391–7398.
- <sup>22</sup> S. M. Weber, J. Queder and G. Hilt, *Chem. Eur. J.*, 2020, **26**, 12129–12133.
- <sup>23</sup> C. Savarin, J. Srogl and L. S. Liebeskind, *Org. Lett.*, 2001, **3**, 91–93.
- <sup>24</sup> Y. N. Kotovshchikov, G. V. Latyshev, N. V. Lukashev and I. P. Beletskaya, *Org. Biomol. Chem.*, 2015, **13**, 5542–5555.
